# Supplementary material for: Role of patient preferences in clinical practice guidelines: a multiple methods study using guidelines from oncology as a case
Source: PubMed Central journal article supplement — BMJ Open. 2019 Dec 5;9(12):e032483. doi: 10.1136/bmjopen-2019-032483 (PMC6924854; doi:10.1136/bmjopen-2019-032483), 2019-12-05
Supplement: bmjopen-2019-032483.draft_revisions.pdf [file bmjopen-2019-032483.draft_revisions.pdf]

# BMJ Open

BMJ Open is committed to open peer review. As part of this commitment we make the peer review history of every article we publish publicly available.

When an article is published we post the peer reviewers' comments and the authors' responses online. We also post the versions of the paper that were used during peer review. These are the versions that the peer review comments apply to.

The versions of the paper that follow are the versions that were submitted during the peer review process. They are not the versions of record or the final published versions. They should not be cited or distributed as the published version of this manuscript.

BMJ Open is an open access journal and the full, final, typeset and author-corrected version of record of the manuscript is available on our site with no access controls, subscription charges or pay-per-view fees (<http://bmjopen.bmj.com>).

If you have any questions on BMJ Open's open peer review process please email [info.bmjopen@bmj.com](mailto:info.bmjopen@bmj.com)

# BMJ Open

## The role of patient preferences in clinical practice guidelines: a mixed method study using guidelines from oncology as a case

|                               |                                                                                                                                                                                                                                                                                                                                                                                                                                                                                                                                                                                                                                                                                                                                                                                                                                                                            |
|-------------------------------|----------------------------------------------------------------------------------------------------------------------------------------------------------------------------------------------------------------------------------------------------------------------------------------------------------------------------------------------------------------------------------------------------------------------------------------------------------------------------------------------------------------------------------------------------------------------------------------------------------------------------------------------------------------------------------------------------------------------------------------------------------------------------------------------------------------------------------------------------------------------------|
| Journal:                      | <i>BMJ Open</i>                                                                                                                                                                                                                                                                                                                                                                                                                                                                                                                                                                                                                                                                                                                                                                                                                                                            |
| Manuscript ID                 | bmjopen-2019-032483                                                                                                                                                                                                                                                                                                                                                                                                                                                                                                                                                                                                                                                                                                                                                                                                                                                        |
| Article Type:                 | Research                                                                                                                                                                                                                                                                                                                                                                                                                                                                                                                                                                                                                                                                                                                                                                                                                                                                   |
| Date Submitted by the Author: | 21-Jun-2019                                                                                                                                                                                                                                                                                                                                                                                                                                                                                                                                                                                                                                                                                                                                                                                                                                                                |
| Complete List of Authors:     | Gärtner , Fania; Leiden University Medical Center<br>Portielje, Johanneke; Leiden University Medical Center, Clinical Oncology<br>Langendam, Miranda; Academic Medical Center, Clinical Epidemiology, Biostatistics and Bioinformatics<br>Hairwassers, Desiree; Breast Cancer Association the Netherlands<br>Agoritsas, Thomas; University Hospitals of Geneva, Division of General Internal Medicine & Division of Clinical Epidemiology; McMaster University Faculty of Health Sciences, Department of Health Research Methods, Evidence, and Impact<br>Gijssen, Brigitte; Netherlands Comprehensive Cancer Organisation<br>Liefers, Gerrit-Jan; Leids Universitair Medisch Centrum, Surgery; Leids Universitair Medisch Centrum,<br>Pieterse, A.H. ; Leids Universitair Medisch Centrum, Medical Decision Making<br>Stiggelbout, Anne; Leiden University Medical Center |
| Keywords:                     | Protocols & guidelines < HEALTH SERVICES ADMINISTRATION & MANAGEMENT, shared decision making, evidence-based medicine, GRADE, patient preferences, choice awareness                                                                                                                                                                                                                                                                                                                                                                                                                                                                                                                                                                                                                                                                                                        |
|                               |                                                                                                                                                                                                                                                                                                                                                                                                                                                                                                                                                                                                                                                                                                                                                                                                                                                                            |

SCHOLARONE™  
Manuscripts

# The role of patient preferences in clinical practice guidelines: a mixed method study using guidelines from oncology as a case

FR Gärtner (1) (<https://orcid.org/0000-0002-0351-0204>), JEA Portielje (2) (<https://orcid.org/0000-0002-5169-6306>), M Langendam (3) (<https://orcid.org/0000-0001-9038-3209>), D Hairwassers (4), T Agoritsas (5,6) (<https://orcid.org/0000-0002-6182-9969>), BCM Gijzen (7) (<https://orcid.org/0000-0003-4578-0293>), GJ Liefers (8) (<https://orcid.org/0000-0001-7326-8313>), AH Pieterse (1) (<https://orcid.org/0000-0001-6395-0052>), AM Stiggelbout (1) (<https://orcid.org/0000-0002-6293-4509>)

1. Medical Decision Making, Department of Biomedical Data Sciences, Leiden University Medical Center, Leiden, The Netherlands,
2. Department of Clinical Oncology, Leiden University Medical Center, Leiden, The Netherlands
3. Department of Clinical Epidemiology, Biostatistics and Bioinformatics, Amsterdam UMC, Amsterdam, The Netherlands
4. Breast Cancer Association The Netherlands (Borstkankervereniging Nederland), The Netherlands
5. Division General Internal Medicine, University Hospitals of Geneva, Geneva, Switzerland
6. Department of Health Research Methods, Evidence, and Impact, McMaster University, Hamilton, L8S 4K1, Canada
7. The Netherlands Comprehensive Cancer Organisation (IKNL), Maastricht/Utrecht, The Netherlands
8. Department of Surgery, Leiden University Medical Center, Leiden, The Netherlands

**Word count:** 4665

**Keywords:** EBM, Clinical Practice Guidelines, Shared Decision Making, patient preferences, patient-centred care, choice awareness

**Corresponding author:**

AM Stiggelbout, A.M.Stiggelbout@lumc.nl

1  
2  
3 1 **ABSTRACT (300 words)**

4 2 *Objectives:* Many treatment decisions are preference-sensitive, and call for shared decision-making,  
5 3 notably when benefits are limited or uncertain, and harms impact quality of life. We explored to  
6 4 what extent clinical practice guidelines (CPGs) acknowledge preference-sensitive decisions in how  
7 5 they motivate and phrase their recommendations.

8 6 *Design:* Mixed-methods study, using CPG content analysis, verified in semi-structured interviews  
9 7 with CPG panel members.

10 8 *Setting:* Dutch oncology CPGs issued in 2010 or later, concerning primary treatment with curative  
11 9 intent.

12 10 *Participants:* 14 CPG panel members.

13 11 *Main outcomes:* For treatment recommendations from six CPG modules, two researchers extracted:  
14 12 strength of recommendation in terms of GRADE and its consistency with the CPG text; completeness  
15 13 of presentation of benefits and harms; incorporation of patient preferences; statements on the the  
16 14 CPG panel's benefits-harm tradeoff underlying recommendation; advice on patient involvement in  
17 15 decision-making.

18 16 *Results:* We identified 32 recommendations of which 18 were acknowledged preference-sensitive  
19 17 decisions. Three of 14 strong recommendations should have been weak based on the module text.  
20 18 The report of benefits and harms, and their probabilities, was sufficiently complete and clear to  
21 19 inform the strength of the recommendation in one of the six modules only. Absolute, numerical  
22 20 probabilities were seldom presented. None of the modules presented information on patient  
23 21 preferences. CPG panel's preferences were not made explicit, but appeared to have impacted 15 of  
24 22 32 recommendations. Advice to involve patients and their preferences in decision-making was given  
25 23 for 20 recommendations (14 weak). Interviewees confirmed these findings. Explanations for lack of  
26 24 information were e.g. that clinicians know the information and that CPGs need to be short.  
27 25 Explanations for trade-offs made were cultural-historical preferences, compliance with daily care,  
28 26 the presumed role of CPGs, and lack of time.

29 27 *Conclusions:* The motivation and phrasing of CPG recommendations do not stimulate choice  
30 28 awareness and a neutral presentation of options, thus hindering shared decision making.  
31 29  
32 30  
33 31  
34 32  
35 33  
36 34  
37 35  
38  
39  
40  
41  
42  
43  
44  
45  
46  
47  
48  
49  
50  
51  
52  
53  
54  
55  
56  
57  
58  
59  
60

1  
2  
3 1 SUMMARY BOX  
4

5 2 Strengths and limitations of this study  
6

- 7  
8 3 • Strength of the study is that the content analysis of the guidelines uses GRADE, in which  
9 4 preference sensitive decisions have a parallel in weak recommendations  
10 5 • Strength of this study is the validation of the content analysis of the guidelines in in-depth  
11 6 interviews with the guideline developers.  
12 7 • Limitation of the study is that only oncology guidelines from one country were studied.  
13 8

14  
15  
16 9 FUNDING  
17

18  
19 10 This work was supported by the Dutch Cancer Society grant number UL 2015-7615. The funding  
20 11 agreement ensured the authors' independence in designing the study, interpreting the data, writing,  
21 12 and publishing the report.  
22

23 13 COMPETING INTERESTS  
24

25  
26 14 TA and ML are active members of the GRADE working group. BG is employed at The Netherlands  
27 15 Comprehensive Cancer Organisation (IKNL), the organization responsible for development of the  
28 16 CPGs that were analyzed. e data, writing, and publishing the report.  
29

30 17 DATA SHARING  
31

32 18 Anonymized transcripts of the interviews may be shared upon request to the corresponding author.  
33  
34  
35  
36  
37  
38  
39  
40  
41  
42  
43  
44  
45  
46  
47  
48  
49  
50  
51  
52  
53  
54  
55  
56  
57  
58  
59  
60

## 1. INTRODUCTION

Many decisions in healthcare are preference-sensitive, in particular when treatments are burdensome, benefits are limited or uncertain, and harms may impact quality of life.<sup>(1)</sup> Examples are decisions about adjuvant treatment in oncology (2-4) or about hip or knee arthroplasty for osteoarthritis.<sup>(5-7)</sup> Research shows that patients as well as clinicians often vary considerably in their evaluation of the balance of benefits and harms. Further, clinicians are not always able to predict their individual patients' preferences.<sup>(8, 9)</sup> Shared decision making (SDM) is therefore advocated particularly in preference-sensitive decisions, but is not yet common practice.<sup>(10, 11)</sup> Clinicians are not prone to fostering choice awareness in their patients,<sup>(12, 13)</sup> often present treatment options in unbalanced ways, e.g., by overestimating benefits and minimizing harms,<sup>(14)</sup> or steer in other ways, consciously or unconsciously.<sup>(15)</sup> Further, numerical probabilities needed to make a trade-off are seldom discussed,<sup>(16)</sup> and patient preferences infrequently elicited.<sup>(17, 18)</sup> This raises the question if clinicians perceive these decisions as preference-sensitive? Clinical practice guidelines (CPGs) could play a role in this perception, given the impact they have on what treatment options clinicians present to their patients. While CPGs may use wording that suggests that a decision is preference-sensitive, such as "we suggest" or "clinicians might", rather than "we recommend" or "clinicians should", clinicians may still not fully appreciate the importance of offering more than one option to their patients.

It is unknown if recommendations in current CPGs identify preference-sensitive decisions and demand a role for patient preferences in decision making. Two older studies showed that the relevance of preferences of individual patients was not acknowledged in many CPGs.<sup>(19, 20)</sup> CPG developers often assume "generally accepted" values in developing recommendations, but do not acknowledge this in the phrasing of the recommendation.<sup>(21)</sup> A request for a more systematic incorporation of patient preferences in CPGs has been expressed repeatedly in high impact journals since the publications of these studies.<sup>(22-25)</sup> The Grading of Recommendations Assessment, Development, and Evaluation (GRADE) working group—whose approach is nowadays considered the standard in CPG development—has published a framework that acknowledges the integration of patients' values and preferences in the development of CPG recommendations.<sup>(26-31)</sup> In the GRADE approach, preference-sensitive decisions are reflected in so-called "weak", or "conditional" recommendations. These arise when benefits and harms are closely balanced, evidence is lacking or of uncertain quality, when patients' preferences are expected to vary substantially, but also when no evidence on patient preferences is available, even with moderate or strong evidence of high quality on the benefits of an option.<sup>(28)</sup> In such situations, GRADE still leads to weak recommendations, assuming that most informed patients would choose the recommended treatment, but a substantial number would not.<sup>(28, 29, 31)</sup> (see Box 1 for a summary of the role that GRADE proposes for patient values and preferences in CPG development)

Therefore, a key ingredient for the identification of preference-sensitive decisions is the acknowledgment of values and preferences in the rationale for CPG recommendations. The aim of our study was therefore to explore to what extent CPGs acknowledge preference-sensitive decisions in the way they support and phrase their recommendations. We further wished to assess if the CPGs facilitate the communication of the preference-sensitive nature of these decisions to patients.

>>> Insert Box 1 about here <<<

## 2. METHODS

Using a mixed-methods approach, we first performed a content analysis of Dutch oncologic CPGs, which we next verified and refined in semi-structured interviews with members of CPG development panels. We assessed if the CPG acknowledges preference-sensitive decisions, and whether the user is able to understand the strength of a recommendation, based on the information presented. We evaluated five themes: 1) the strength of recommendations, and if this was supported by information in the CPG, 2) if the balance of benefits and harms was made explicit, and informed by the probabilities of these, 3) if evidence on patient preferences (or variation therein) had been searched for and presented, 4) if there was a statement on the preferences that underlie the CPG panel's weighing of the benefits and harms to derive a recommendation, and 5) if the CPG recommends if and how patient preferences should be incorporated in decision making for the individual patient.

We used Dutch oncologic CPGs as a case, because oncology is strongly guideline-driven, decisions are often preference-sensitive, the guideline development process is organized nationally, and the CPGs are open access. The Netherlands Comprehensive Cancer Organisation (IKNL) develops guidelines "under responsibility of the most relevant professional or scientific society, usually following evidence-based methodology" ([www.oncoline.nl](http://www.oncoline.nl)).

### 2.1 Content analysis of CPGs

#### 2.1.1 Selected CPG modules

We selected three tumour-specific CPGs, and of each we selected two modules to include in our analysis. (i.e., the sections of the CPGs that address specific treatments or patient groups). We selected modules that we expected to contain at least one preference-sensitive decision, requiring a weak recommendation. This expectation was based on views from the oncology experts on our research team, or on the availability of literature on SDM and decision aids for the treatment in that module. Each of the modules includes more than one recommendation.

Further criteria for selection of the CPGs and the modules were: published on [www.oncoline.nl](http://www.oncoline.nl), issued in 2010 or later, and concerning primary treatment with curative intent. Table 1 presents the CPGs and modules we selected. For the breast cancer CPG, our contact person at the IKNL provided us confidentially with the most recent revision of the two selected modules, which were not yet published at the time of our analysis.

#### 2.1.2 Data extraction and analysis

We developed a coding scheme that consisted of five sections covering the themes described above.

*Ad 1. Strength of recommendations:* First, we scored the strength of the recommendation for each treatment option from the Recommendation section, based on the phrasing used (*strongly in favour/ weakly in favour/ neutral / weakly against/ strongly against* a specific option). The categories strong and weak are in line with GRADE. We added the 'neutral' category if a weak recommendation for more than one option was given.

1  
2  
3 1 Next, we assessed whether this strength of recommendation was supported by information  
4 2 elsewhere in the guideline, including information about the certainty of the evidence, the balance  
5 3 between benefits and harms and their probabilities, the variability or uncertainty in how patients  
6 4 value the benefits and harms. If other criteria were provided, we coded these as well. We extracted  
7 5 all information that indicated a discrepancy with the strength of recommendation, and scored  
8 6 whether or not textual discrepancies were identified (*yes/no*). We based this on the CPG text, and  
9 7 did not resort to the supporting literature.  
10 8

11 9 Ad 2. Balance of benefits and harms (trade-offs): we defined a *trade-off* as a statement presenting  
12 10 the balance of benefits and harms in the treatment decision, ideally based on the probability of  
13 11 benefits and harms, the quality of the evidence, and on how much patients value the outcomes. We  
14 12 extracted statements about the trade-offs made in the CPG or about the trade-offs to be made in  
15 13 the clinical encounter with the individual patient (*trade-offs made explicit/trade-offs not made*  
16 14 *explicit*). We also judged whether the presentation of outcomes was sufficiently complete and clear  
17 15 to inform the trade-off (*sufficient/insufficient*).  
18 16

19 17 Ad 3. Patient preferences: We assessed if patient preferences had been incorporated (*yes/no*), and if  
20 18 so, how (*literature search/data collection by CPG panel/other*). Also, we extracted whether explicit  
21 19 assumptions were made regarding patient preferences (*yes/no*).  
22 20

23 21 Ad 4. CPG panel's values and preferences: We extracted information about the preferences that  
24 22 supported the CPG panel's weighing of benefits and harms, and summarized per treatment  
25 23 recommendation if these preferences were explicitly mentioned (*yes/no*). This theme does not  
26 24 directly originate from the GRADE recommendations. We added it as we encountered statements  
27 25 suggesting that CPG panel's values and preferences had influenced the development of  
28 26 recommendations.  
29 27

30 28 Ad 5. Advice on how to involve the patient: We extracted statements that described how to involve  
31 29 an individual patient or his/her preferences in the decision making process, and summarized per  
32 30 recommendation if such statement was given (*yes, actively involving the patient or patient*  
33 31 *preferences in the decision making/yes, informing the patient/no advice about patient involvement*).  
34 32

35 33 Two coders (FG and AS) independently applied a first draft of the coding scheme to a CPG module  
36 34 that would not be included in the final selection. They subsequently discussed the coding process  
37 35 and any inconsistencies, and updated the coding scheme. They had not been involved in the  
38 36 development of any CPG in oncology nor GRADE, and had no existing working relationship with the  
39 37 members of the respective CPG panels. The coders independently applied the coding scheme to one  
40 38 of the selected modules, and resolved any discrepancies by consensus. Based on this discussion no  
41 39 further changes were made to the scheme. One researcher (FG) then coded the remaining modules,  
42 40 and the second checked the extraction and scoring. They discussed any inconsistency between them  
43 41 until agreement was reached. Data extracted was analysed descriptively.  
44 42  
45 43  
46  
47  
48  
49  
50  
51  
52  
53  
54  
55  
56  
57  
58  
59  
60



## 2.2 Semi-structured interviews with CPG developers

### 2.2.1 Recruitment

We or our IKNL contact person invited the panel members involved in the development of the selected modules for participation. Membership and size of the different CPG panels varied, not all were multidisciplinary, and not all included a patient representative. We aimed to interview at least one member of each specialty involved in the development of a module, the patient representative, and the IKNL supervisor of the CPG. As patient representatives did not participate in this study based on a paid position, the respective patient organizations received an incentive of 100 Euros. The study protocol did not require review from a medical ethics committee as no patients or lay people were recruited.

### 2.2.2 Data collection

In semi-structured interviews, we first checked whether the interviewee agreed with our interpretation of the strength of recommendations, our extraction of the discrepancies found in the CPG text, of the trade-offs, and the completeness and clarity of the presentation of the benefits and harms, of the role of patient preferences, and of the preferences of the CPG panels that supported the recommendations. For the benefits, harms, and trade-offs we asked them how the developers selected which ones to present, and whether the presentation of benefits and harms aimed to facilitate communication in the clinical encounter. Finally, we discussed the function of statements concerning the involvement of patients and their preferences in decision making for the individual patient.

We adapted the questions to the specific content of the module to be discussed. For each subsequent interview we added or adapted questions based on earlier interviews. Interviews lasted 30 to 60 minutes, were audiotaped, and transcribed verbatim.

### 2.2.3 Coding and analysis

We adhered to the Framework Approach to code and analyse the interviews.(32, 33) The coding scheme was based on the five themes of the CPG analysis described above. First, two researchers (FG and AS) independently familiarized themselves with the data, and coded three interviews deductively, to supplement our coding scheme with any additional emerging themes. Dissimilarities in coding were discussed and codes were adapted based on consensus. Second, one researcher applied deductive coding to all other interviews and refined, and reduced the codes in a process of re-reading and constant comparison of codes. Third, categories of codes were clustered to generate (sub)themes. Steps two and three were performed by one researcher and checked by the second. Inconsistencies in interpretation of the data and formulation of codes and themes were discussed until consensus was reached. Coding was performed using Atlas.ti software.(34)

## 2.3 Patient involvement

The CPG committee involved patient representatives for two modules, and we interviewed these patients. One patient (DH) took part in the writing of the manuscript. The article will be shared with the Netherlands Federation of Cancer Patient Societies NFK.

## 3. RESULTS

We present the results of the content analysis and the interviews together, structured around the five themes mentioned above. We interviewed 14 CPG panel members: 10 clinicians, two patient

representatives, and two IKNL supervisors (Table 1). For one module (adjuvant endocrine therapy in breast cancer), none of the clinician panel members was willing to participate, therefore only the IKNL supervisor and the patient panel member were interviewed. Patients were not part of the CPG panel for the NSCLC modules. To illustrate our analyses we add examples of the extractions of the CPG modules in Box 2-5.

### 3.1 Strength of CPG recommendations

In the six modules we identified 32 recommendations, of which 14 were phrased as strong and 18 as weak or neutral. The proportion of weak or neutral recommendations was just over half for all modules, except for that on adjuvant chemotherapy for colorectal carcinoma, which had fewer weak recommendations (33%). For five of the recommendations, both strong (three) and weak (one) or neutral (one), we found discrepancies between the strength of recommendation and extracted sentences from the module text. Box 2 shows examples of such discrepancies. In two of the strong recommendations, the discrepancy concerned evidence that was limited or of (very) low quality.

>>> Insert Box 2 about here <<<

The CPG panel members confirmed our interpretation of the strength of recommendations. They explained that the three strong recommendations in the case of limited evidence were based on a valuation of the outcomes by the CPG panel (see further under 3.4). One explanation for the discrepancies between the strength of recommendation and the extracted were the differences in the handling of low quality evidence between methodologists and clinicians. One clinician described methodologists as being more careful in drawing conclusions, while clinicians incorporate current standards of practice in the formulation of recommendations.

*Panel member: I think that it is inherent to making recommendations, where clinicians and methodologists clash. I am currently preparing the revision of the guideline, and what one sees is that we simply clash immediately with the methodologists in the preparation of the revision. Those are very dogmatic in their methodologic thinking. And the problem is, that that does not work, particularly not for the medical literature, so to say. And that is why the GRADE methodology explicitly discusses that in their approach, that one can upgrade the recommendation if one agrees as professional group that something should or should not be done.*  
(Interview 10 ,about T1 carcinoma in polyp)

### 3.2 Information supporting the balance of benefits and harms

Three of the modules (T1 carcinoma in polyp and adjuvant chemotherapy in colorectal cancer, stereotactic radiotherapy in NSCLC) included explicit trade-off statements (see Box 3). Probabilities of outcomes were mentioned in one of these, but for the benefits only. One trade-off statement substantiating a strong recommendation included the presentation of a value judgment, but it was unclear whose values it presented “it is agreed upon that it is safe ...,” and “the risk of radiation pneumonitis seems acceptable”.

For one of the six modules, adjuvant chemotherapy for colorectal cancer, we rated the report of benefits and harms and their probabilities as sufficiently complete and clear to inform the strength of recommendation. In three modules information was lacking about benefits, in four about harms, and harms were often only presented generically (e.g., “complications”, “psychological impact”).

1  
2  
3 1 Relative rather than absolute risk reduction was often presented, verbal labels rather than numbers  
4 2 were used to convey risk, e.g., *“The chance of eventually preserving the breast is higher if radiation*  
5 3 *of the breast already takes place after the first excision”*.

6 4  
7 4  
8 5 >>> Insert Box 3 about here <<<

9 6  
10 7 Some interviewees found that transparency about the trade-offs in the CPG text could be improved,  
11 8 while others found an explicit mention, including details about benefits and harms and their  
12 9 probabilities, unnecessary. Reasons for the latter were time constraints, the aim to keep the CPG  
13 10 short, the assumption that CPG-users know the balance of benefits and harms, or that the weighting  
14 11 of benefits and harms was acceptable to everyone. One interviewee, e.g., stated that not  
15 12 recommending endocrine treatment in DCIS was “common knowledge” and that *“we also could*  
16 13 *have chosen to just leave out the whole paragraph about this adjuvant therapy, to just not mention it*  
17 14 *at all.”* (Interview 15)

18 15  
19 16 The interviewees indicated that in none of the modules patients had been involved in the selection  
20 17 of the outcomes described. Some acknowledged that outcomes might be missing, but a substantial  
21 18 number did not regard a complete presentation of outcomes and their probabilities as necessary,  
22 19 using the following arguments: guidelines should be short, harms are assumed to be common  
23 20 knowledge for clinicians or might be presented in other modules, evidence for long-term harms is  
24 21 lacking, and probabilities from the literature are not applicable to the Dutch setting or would only be  
25 22 representative at the hospital level, not at that of the individual clinician (i.e., for mortality due to  
26 23 surgery). Several interviewees were especially reticent to present probabilities in terms of absolute  
27 24 risk reduction, as those percentages would soon be dated, differed between patient groups, or  
28 25 would be too time-consuming to calculate. One stated to have argued to include Numbers Needed  
29 26 to Treat in the CPG, to no avail.

30 27  
31 28 **Interviewer:** *and for what reason is the other side of the coin not mentioned in the CPG?*  
32 29 *You indicated, already, that actually...*

33 30 **Panel-member:** *the CPG is mostly written to, what we provide as recommendation*  
34 31 *towards the patient, for the outcome of treatment. I don't know if the CPG is written at*  
35 32 *least, I have never interpreted it as such, but I don't know if one should put in the CPG,*  
36 33 *let's say, what's it called, all risks of treatment. That differs per agent, have different*  
37 34 *risks. And then the CPG becomes much more extensive. But that is also the baseline*  
38 35 *knowledge that every oncologist should have.*

39 36 (Interview 7, about adjuvant chemotherapy for colon carcinoma)

### 40 37 41 38 **3.3 Patient preferences**

42 39 None of the modules stated that evidence about patient preferences had been searched for or  
43 40 elicited. No information was presented about generic patient preferences, or about variation in  
44 41 patient preferences, either from the literature or assumed by the panel.

45 42  
46 43 Some interviewees acknowledged that patient preferences may vary and may differ from clinician  
47 44 preferences, and they stressed that the awareness of such variation sometimes motivated a weak  
48 45 recommendation. Reasons not to include information about patient preferences were: time and  
49 46 capacity constraints, the assumption that no evidence exists, or lack of awareness that this

1 information is to be included. Others were reluctant to include information about preference  
2 variation, because it could threaten the relationship between specialties (if this information would  
3 lead to patients choosing against the generally accepted treatment modality). Numerous  
4 assumptions about patient preferences were voiced, such as that patients prefer lumpectomy to  
5 mastectomy, length of life to quality of life, and active treatment to refraining from treatment.  
6 Interviewees also stressed that if patients have a strong preference, they will express it anyway.

### 3.4 CPG panels' values and preferences

9 None of the modules explicitly labelled statements as presenting the CPG panel's values and  
10 preferences that underlie their weighing of the benefits and harms. We found implicit reference to  
11 CPG panels' preferences, having influenced the development of the recommendation in 15/32  
12 recommendations (see Box 4). These preferences concerned 9/14 strong recommendations and  
13 6/18 weak recommendations (see Table 2).

15 >>> Insert Box 4 about here <<<

17 As described under 3.1, the interviewees sometimes explained discrepancies between the strength  
18 of recommendation and the extracted information by the CPG panel's valuation of the outcomes.  
19 Explanations for the panel members' preferences beyond the evidence were: compliance with daily  
20 practice; the organisation of care; culture (a preference for radiotherapy seemed more culturally  
21 and historically determined than evidence-based); and concerns about keeping a good relationship  
22 between specialties when their treatments compete.

23 Some interviewees found that CPG panels' preferences underlying the weighing of benefits and  
24 harms should be made explicit. One interviewee stated that having an external party critically  
25 reviewing the CPGs before publication would foster this. The panel members often expressed their  
26 own preference for active treatment versus refraining from (further) treatment or active  
27 surveillance, even at the expense of over-treating a substantial part of the patient population.

29 **Panel member:** *That is watertight, radiotherapy does have an effect. Not for everyone,  
30 far from it, but for some. And we cannot sufficiently select for whom it does, so we say,  
31 give radiation to all.*

32 (Interview 4, about radiotherapy for DCIS patients)

34 Their motivation was mostly a strong belief in survival gain for a subgroup that cannot be identified  
35 as of yet. In these instances, panel preferences for active treatment had influenced the balancing of  
36 benefits and harms, such that a recommendation for active treatment would not be a weak one.

37 This was argued e.g. for treatment aimed at reducing local recurrence rates without concomitant  
38 survival gain. Concerning this example, an interviewee argued in one instance that it was preferable  
39 simply to not include survival as an outcome, as no survival gain was possible given the already high  
40 survival (Interview 2, about radiotherapy for DCIS).

42 **Panel member:** *... but I find it a bit of a bromide to say that DCIS, or rather that  
43 radiotherapy for DCIS yields no survival benefit and therefore we shouldn't do it. Because  
44 one cannot improve upon 99 % survival benefit. The important thing is, in which sub-  
45 groups those recurrences occur that might not be such nice recurrences, that call for a lot  
46 more treatment and the like....*

1 (Interview 2, about radiotherapy for DCIS patients)

2  
3  
4  
5  
6  
7  
8  
9  
10  
11  
12  
13  
14  
15  
16  
17  
18  
19  
20  
21  
22  
23  
24  
25  
26  
27  
28  
29  
30  
31  
32  
33  
34  
35  
36  
37  
38  
39  
40  
41  
42  
43  
44  
45  
46  
47  
48  
49  
50  
51  
52  
53  
54  
55  
56  
57  
58  
59  
60

2  
3  
4  
5  
6  
7  
8  
9  
10  
11  
12  
13  
14  
15  
16  
17  
18  
19  
20  
21  
22  
23  
24  
25  
26  
27  
28  
29  
30  
31  
32  
33  
34  
35  
36  
37  
38  
39  
40  
41  
42  
43  
44  
45  
46  
47  
48  
49  
50  
51  
52  
53  
54  
55  
56  
57  
58  
59  
60

At the same time, others voiced opinions against over-treatment and pointed out that the paradigm in favour of over-treatment to avoid under-treatment is shifting, particularly in patients diagnosed by population screening (DCIS, T1 carcinoma in polyp).

### 3.5 Advice about patient involvement in decision-making

Five modules included in total 20 statements about the patient's role in decision-making (see Box 5). Relatively more statements (14) were seen for the weak than for the strong (6) recommendations. All statements recommended to include the patient's preferences in making the decision except for two, relating to weak recommendations, that recommended to inform the patient about the trade-off. One of the three CPGs included a separate chapter about decision-making, in which it was recommended to elicit the preferences of the patient in an SDM process.

Interviewees disagreed on the necessity of recommendations about patient involvement in decision-making. Several stressed that these statements were included only because the patient representative asked for it. Others mentioned that the inclusion was based on the opinion of individual panel members.

>>> Insert Box 5 about here <<<

## 4. DISCUSSION

Healthcare is increasingly guideline-driven, which promotes quality of care and reduces unwarranted practice variation. But guidelines may be a barrier to SDM if they do not acknowledge the preference-sensitive nature of many treatment decisions.<sup>(1, 30)</sup> The aim of this study was to explore to what extent CPGs acknowledge preference-sensitive decisions in their recommendations. Our analysis showed that the guidelines involved incomplete and unclear presentation of benefits, harms, and the probabilities thereof. This makes it difficult for the users not only to judge the appropriateness of the strength of the recommendation, but also to inform patients about the trade-offs as part of an SDM process. Whether or not clinicians have complete knowledge about all benefits and harms and their probabilities is questionable, and from an earlier study we know that at least many clinicians do not share this information with their patients during the decision making process.<sup>(14, 15)</sup> Complete and clear presentation in CPGs of the benefits and harms help to fill knowledge gaps in CPG users, and acknowledge the importance of the information for the trade-offs to be made with the individual patient in preference-sensitive decisions.

Furthermore, information on patient preferences or the variation therein, was not included in any of the six modules analysed. If GRADE were to be followed, this lack of evidence on patient preferences should have led to more weak recommendations than seen. Additionally, we found indications that panel members' assumptions about patient preferences as well as their own preferences, determined the recommendations. This corroborates findings of De Kort et al. <sup>(21)</sup> on the role of value judgements in guideline formulation in palliative oncology. They found that preferences, such as those for intervening and prolonging life, were not mentioned in the guidelines but had played an important role in determining final recommendations. In line with a study by

1  
2  
3 1 Alexander et al. (35), it appeared that panel members find it difficult to refrain from providing a clear  
4 2 recommendation in a case of limited or conflicting evidence. CPG panel preferences for active  
5 3 treatment had influenced the way the panel had balanced benefits and harms, such that a  
6 4 recommendation for active treatment would be strong and overtreatment likely. The strong belief in  
7 5 survival gain for a subgroup that cannot be identified as of yet fosters the so-called therapeutic  
8 6 illusion, in which both physicians and patients overestimate the benefits of treatment, since patients  
9 7 are seemingly cured by treatment while they might have had the same outcome without  
10 8 treatment.(36) Rather than routinely resort to active treatment in these instances, the discussion  
11 9 should be opened on how to deal with such uncertainties. Little research is available yet on how best  
12 10 to communicate uncertainty,(37) but this does not relieve us from the obligation to discuss matters  
13 11 honestly with patients. Such openness would contribute to reducing unnecessary treatment,  
14 12 addressing unacceptable variation, and delivering more appropriate, personalised care.(38)  
15 13 Guidelines can facilitate this discussion by acknowledging preference-sensitive decisions, and  
16 14 encouraging users to become more aware of choice and presenting multiple options to patients.  
17 15

16 16 A limitation of the format of GRADE, is that it asks for a dichotomous categorization (weak vs.  
17 17 strong) and a recommendation either *for* or *against*. This categorization makes it difficult to  
18 18 explicitly state that multiple options are medically reasonable. Furthermore, information on patient  
19 19 preferences should be more often sought in guideline development. Oncologist experts are invited  
20 20 in guideline panels because of their content expertise, but this involves a risk when more evidence is  
21 21 available for benefits than for harms, and when there is no evidence on patient preferences. Then  
22 22 chances increase that that panel members resort to their own preferences, often favouring active  
23 23 treatment and neglecting harms.(39) The guideline development process, while aiming at achieving  
24 24 EBM, may threaten it by its reliance on expert judgment at the expense of involving patient  
25 25 preferences. GRADE publications accede that panels' judgements of patient preferences often relies  
26 26 on their interactions with patients, but how well such judgements correspond to typical values and  
27 27 preferences is uncertain.  
28 28

29 29 We do not know to what extent our analysis will hold for CPGs from other countries than the  
30 30 Netherlands. Dutch healthcare is likely less paternalistic than that in many other countries, and the  
31 31 Netherlands are leading in the implementation of SDM(40). We therefore expect more discrepancies  
32 32 between evidence and recommendations to arise elsewhere. De Kort et al.,(21) analysed a sample of  
33 33 evidence-based oncology guidelines from other countries, and found that recommendations were  
34 34 rarely explained and value judgements were not made explicit either. Further, we do not know if,  
35 35 but have no reason to expect that our findings will be different for other specialties. We urge  
36 36 researchers in other countries and other fields to evaluate their guidelines with preference-  
37 37 sensitivity in mind as well.  
38 38

39 39 An analysis like the one performed runs the risk of subjectivity, as the data extraction and coding  
40 40 requires interpretation. We therefore checked our results with the developers of the guidelines we  
41 41 studied. This provided a validation of our analysis. The aim of this endeavour was to highlight an  
42 42 issue that is a major barrier to patient-centred care and SDM in particular.(41) With the strong  
43 43 current call for patient involvement, worldwide, it is important to establish to what extent guidelines  
44 44 potentially hinder such involvement, and our study may be seen as a first step in that direction.  
45 45

1  
2  
3 1 In sum, our analysis points out a lack of transparency in the CPG development process. Being more  
4 2 transparent about benefits and harms and their probabilities, as well as about the preferences of the  
5 3 guideline panel members, and their assumptions about patient preferences, will help avoid what  
6 4 McCartney feared in his 2016 Analysis in the BMJ: “there is the danger of guideline  
7 5 recommendations being applied to people who do not place the same values on those  
8 6 recommendations as their clinician (...)”.(23)  
9  
10  
11  
12  
13  
14

#### 15 10 **ACKNOWLEDGEMENTS**

16 11 We thank all interviewees for their participation in this study.  
17 12

#### 18 13 **AUTHORS CONTRIBUTION**

19  
20  
21 14 FRG, AP, and AMS designed the study. FRG and AMS conducted the data extraction. FRG, AMS,  
22 15 wrote the first draft of the manuscript. All authors were involved in interpreting the results. All  
23 16 authors have read the manuscript and made improvement of the content and wording and have  
24 17 agreed to the final version. The corresponding author attests that all listed authors meet authorship  
25 18 criteria and that no others meeting the criteria have been omitted.  
26  
27  
28  
29  
30

#### 31 21 **EXCLUSIVE LICENCE STATEMENT**

32 22 The Corresponding Author has the right to grant on behalf of all authors and does grant on behalf of  
33 23 all authors, a worldwide licence to the Publishers and its licensees in perpetuity, in all forms, formats  
34 24 and media (whether known now or created in the future), to i) publish, reproduce, distribute, display  
35 25 and store the Contribution, ii) translate the Contribution into other languages, create adaptations,  
36 26 reprints, include within collections and create summaries, extracts and/or, abstracts of the  
37 27 Contribution and convert or allow conversion into any format including without limitation audio, iii)  
38 28 create any other derivative work(s) based in whole or part on the on the Contribution, iv) to exploit  
39 29 all subsidiary rights to exploit all subsidiary rights that currently exist or as may exist in the future in  
40 30 the Contribution, v) the inclusion of electronic links from the Contribution to third party material  
41 31 where-ever it may be located; and, vi) licence any third party to do any or all of the above.  
42  
43  
44  
45  
46  
47  
48  
49  
50  
51  
52  
53  
54  
55  
56  
57  
58  
59  
60

1  
2  
3  
4  
5  
6  
**Box 1: The GRADE approach and GRADE's proposed role of patient values and preferences in CPG recommendation development:**

7 GRADE offers an approach to rate the certainty in the evidence and strength of recommendations, in  
8 which *strong* and *weak* (also known as *conditional*) recommendations are distinguished.

9  
10 Consideration of patient preferences is a crucial step in deciding on the strength of the  
11 recommendation. According to the GRADE approach, first, the best estimates of effect for the  
12 interventions and the certainty in this evidence (quality of the evidence) is assessed, using up-to-  
13 date systematic reviews. Further, the CPG panel should consider a number of criteria that influence  
14 the strength of recommendations, such as variability or uncertainty in how patients value the main  
15 outcomes (both benefits and harms), the balance between benefits and harms, and considerations  
16 of resource use, health equity, feasibility and acceptability (from both stakeholder and patient  
17 perspective) of an intervention.(26-30) Based on an overall assessment across these criteria, CPG  
18 panels reach a conclusion about the direction of their recommendation (for or against the  
19 intervention) and the strength of their recommendation: strong or weak.(26) A high level of  
20 certainty across the criteria (such as high quality evidence, clear balance between benefits and  
21 harms, no uncertainty in patient preferences) allows for strong recommendations. A high level of  
22 uncertainty, i.e., preference-sensitive decisions, leads to weak recommendations: there is more than  
23 one single best option available, there is important uncertainty or variability in patient preferences,  
24 or the benefits and harms are closely balanced.  
25  
26  
27  
28  
29

30 To guarantee the acknowledgement of patient preferences in the development of  
31 recommendations, the GRADE strategy asks to clearly present i) how substantial benefits and harms  
32 are, what their balance is, and what the overall certainty of the evidence on these outcomes is, and  
33 ii) if there is uncertainty about or variability in how much patients value the important  
34 outcomes.(26, 27, 47) In other papers GRADE recommends guideline developers to make  
35 transparent and explicit statements iii) about the (variability in) patient values and preferences, as  
36 well as CPG panel assumptions of these values and preferences on which decisions on the strength  
37 of recommendations are based, in order to be able to judge the applicability of recommendations  
38 for decision making with the individual patient.(28, 29)  
39  
40  
41  
42  
43  
44  
45  
46  
47  
48  
49  
50  
51  
52  
53  
54  
55  
56  
57  
58  
59  
60



1  
2  
3 **Box 2. Examples of textual discrepancies between strength of recommendation and statements in**  
4 **other parts of the CPG module**  
5  
6  
7  
8  
9

10 **1. Strongly phrased recommendation for adjuvant radiotherapy after lumpectomy in DCIS**  
11 **patients, combined with a statement about the relevance of patient involvement in the decision:**

12 Recommendation

13 *"After complete excision of DCIS, radiotherapy of the whole chest wall (with or without boost) is*  
14 *recommended."* (Section: Recommendations, module 1)

15 Statement about patient involvement

16 *"Individual risk assessment and good deliberation with the informed patient determine whether*  
17 *radiotherapy is applied, with or without boost."* (Section: Recommendations, module 1)

18  
19  
20 **2. Strongly-phrased recommendation for adjuvant chemotherapy for patients with an MSI colon**  
21 **carcinoma, combined with a statement about very low-quality evidence.**

22 Recommendation

23 *"It is recommended that patients with an MSI carcinoma are offered only fluoropyrimidine-*  
24 *oxaliplatin-based chemotherapy."* (Section: Recommendations, module 4)

25 Statement about the evidence

26 *"The limited evidence concerning the value of oxaliplatin-based chemotherapy in this group shows*  
27 *no difference compared to patients with MSS tumours, so for patients with stage III MSI tumours,*  
28 *oxaliplatin-based chemotherapy remains recommended for now."* (Section: Literature review,  
29 module 4)  
30  
31  
32

33  
34  
35  
36  
37  
38  
39  
40  
41  
42  
43  
44  
45  
46  
47  
48  
49  
50  
51  
52  
53  
54  
55  
56  
57  
58  
59  
60

4  
5  
6

CON view only

1  
2  
3  
4  
5  
6  
7  
8  
9  
10  
11  
12  
13  
14  
15  
16  
17  
18  
19  
20  
21  
22  
23  
24  
25  
26  
27  
28  
29  
30  
31  
32  
33  
34  
35  
36  
37  
38  
39  
40  
41  
42  
43  
44  
45  
46  
47  
48  
49  
50  
51  
52  
53  
54  
55  
56  
57  
58  
59  
60

1 **Box 3: Extracted trade-off statements**

**Trade-off statement for a strong recommendation:**

- *It is generally agreed upon that a dose of 45–60 Gy in 3 fractions is safe and can achieve good (> 80%) local tumour control. The risk of radiation pneumonitis appears to be acceptable. However, long-term data on the late toxicity of SBRT is lacking, especially for T2 tumours. Evidence pertaining to quality of life is likewise sparse. (Conclusions, module 3a)*

**Trade-off statements for weak recommendations:**

- *Additional surgical resection after endoscopic removal of a malignant polyp should always be a balanced decision because of the relative high number needed to treat, for which the patient should always be fully informed about the potential oncologic benefit on the one hand and the risk of complications on the other (Recommendations, module 2a, used for weak recommendations)*
- *In various case-series, the incidence of local lymph node metastases in T1 colorectal carcinoma varies from 8 to 14 %.<sup>654 1082 1259</sup> There is also a large chance that surgical (segmental) resection of the colon has no therapeutic benefits, while being associated with morbidity and even mortality. Hence, it is important to make a well-considered choice for the treatment of malignant polyps.” (Section: Literature review, module 2a)*
- *For high risk malignant colon polyps the oncologic benefit of additional resection should be balanced against the risk of morbidity and possibly even mortality. In this trade-off the age, tumor location, comorbidity of the patient, and the preference of the patient should be taken into account. All patients should be discussed in the multidisciplinary team. (Section: Considerations, module 2a, used for weak recommendations)*
- *A retrospective subgroup analysis of the MOSAIC studying patients with Stage II colon carcinoma has shown that adding oxaliplatin to a fluoropyrimidine does not convey significant gain in dFS and OS. It seems useful to educate patients with high risk Stage II colon carcinoma about the possible advantages of adjuvant chemotherapy and the concomitant side effects. (Section: literature review, module 2b, used for weak recommendation) ]*
- *Treatment of centrally-located tumours is still under debate, given its high toxicity (Conclusions, module 3a, used for weak recommendation)*

1  
2  
3 **1 Box 4: Examples of CPG panels' values or preferences reflected in the CPG modules**

| CPG statement on which the interpretation of the panel's preference is based.                                                                                                                                                                                                                | Description of the identified CPG panel's preference                                                                                                                                                                                                                                                                                                                                                                                                                                                                                                                                                                                                  | Concerning what type of recommendation |
|----------------------------------------------------------------------------------------------------------------------------------------------------------------------------------------------------------------------------------------------------------------------------------------------|-------------------------------------------------------------------------------------------------------------------------------------------------------------------------------------------------------------------------------------------------------------------------------------------------------------------------------------------------------------------------------------------------------------------------------------------------------------------------------------------------------------------------------------------------------------------------------------------------------------------------------------------------------|----------------------------------------|
| <i>If breast-conserving surgery is not feasible or desirable, there is an indication for mastectomy. (Section: Literature review, module 1)</i>                                                                                                                                              | The panel appears to prefer breast-sparing surgery to mastectomy; mastectomy is considered only when breast-sparing surgery is not feasible or desirable.                                                                                                                                                                                                                                                                                                                                                                                                                                                                                             | <i>2 weak</i>                          |
| <i>DCIS is often discovered based on calcifications on the mammogram that, when biopsied, turn out to be associated with this DCIS. DCIS does not metastasize, and patients with DCIS hence have an excellent prognosis with adequate local treatment. (Section: Introduction, module 1)</i> | The panel prefers local treatment and therefore has a more positive attitude about radiotherapy and a less positive attitude about endocrine therapy for DCIS from the outset. (Supplemental note: no survival benefit has been demonstrated for either radiotherapy or endocrine therapy. It is, however, suspected that a subgroup of the radiotherapy group does indeed have improved survival. Radiotherapy also has an effect on the risk reduction of an invasive recurrence, which appears to be more limited with endocrine therapy. This could be a reason for the more positive attitude toward radiotherapy compared to endocrine therapy) | <i>1 strong</i>                        |
| <i>The risk of radiation pneumonitis seems to be acceptable (Section: Conclusions, module 5)</i>                                                                                                                                                                                             | The panel finds the risk of radiation pneumonitis acceptable. In the literature, this risk is only represented in chance words: the risk is "very low" and "generally low". The reader is shown neither the absolute risk or patient preferences relevant to this trade-off.                                                                                                                                                                                                                                                                                                                                                                          | <i>1 strong and 1 weak</i>             |
| <i>Radiotherapy hence appears to be effective, considering that without adjuvant radiotherapy the risk of recurrence is expected to be higher and the chance of cure to be lower. (Section: Literature review, module 6)</i>                                                                 | In case of positive surgical margins, there is a strong recommendation in favour of adjuvant radiotherapy, arising from the assumption that the benefits outweigh the disadvantages. The phrase "appears to be effective" is used, but the guideline does not state the absolute survival gain and does not address side effects, short term or long term. Furthermore, we do not know if patients differ in how they weigh these considerations.                                                                                                                                                                                                     | <i>1 strong</i>                        |

38 2  
39 3  
40 4  
41 5  
42  
43  
44  
45  
46  
47  
48  
49  
50  
51  
52  
53  
54  
55  
56  
57  
58  
59  
60

1  
2  
3 **1 Box 5: Examples of phrasings about the patient role**  
4  
5

6 **Statements that propose to inform the patient:**

- 7 1. *Additional surgical resection after endoscopic removal of a malignant polyp should always*  
8 *be a considered decision, given the relatively high 'number needed to treat', in which the*  
9 *patient must be fully informed about the possible oncological benefit on the one hand and*  
10 *the risk of complications on the other. (Section: Recommendations, module 3)*  
11 2. *It appears worthwhile to inform patients with a high-risk stage II colorectal carcinoma*  
12 *about the possible advantages of adjuvant chemotherapy and the associated side-effects.*  
13 *(Section: Literature review, module 4)*  
14

15  
16 **Statements that propose to include the patient's preferences in making the decision:**

- 17 1. *Side-effects and effectiveness of both endocrine therapy and radiotherapy should be*  
18 *weighed together with the patient. (Section: Recommendations, module 1)*  
19 2. *For high-risk malignant colon polyps, the oncological benefit of additional colon resection*  
20 *should always be weighed against the risk of morbidity and even mortality. Age, tumour*  
21 *location, comorbidity, and the patient's preference should be included in this trade-off.*  
22 *(Section: Considerations, module 3)*  
23  
24  
25

26  
27  
28  
29  
30  
31  
32  
33  
34  
35  
36  
37  
38  
39  
40  
41  
42  
43  
44  
45  
46  
47  
48  
49  
50  
51  
52  
53  
54  
55  
56  
57  
58  
59  
60

2

1  
2  
3  
4  
5  
6  
7  
8  
9  
10  
11  
12  
13  
14  
15  
16  
17  
18  
19  
20  
21  
22  
23  
24  
25  
26  
27  
28  
29  
30  
31  
32  
33  
34  
35  
36  
37  
38  
39  
40  
41  
42  
43  
44  
45  
46

**Table 1:** Overview of CPGs and modules analysed, number of interviews, and role and speciality of interviewees.

| Localisation                                 | Module                      | Publication date                                     | Approach                                         | Number of options discussed in recommendations | Strength of recommendations |             |            |            |            | Role and speciality of interviewees <sup>§</sup>                                 |
|----------------------------------------------|-----------------------------|------------------------------------------------------|--------------------------------------------------|------------------------------------------------|-----------------------------|-------------|------------|------------|------------|----------------------------------------------------------------------------------|
|                                              |                             |                                                      |                                                  |                                                | In favour                   |             | Neutral    | Against    |            |                                                                                  |
|                                              |                             |                                                      |                                                  |                                                | Strong                      | Weak        |            | Weak       | strong     |                                                                                  |
| <b>Breast cancer</b>                         | DCIS                        | Unpublished concept (27 <sup>th</sup> February 2017) | GRADE                                            | 5                                              | 1                           | 0           | 3          | 0          | 1          | Surgeon (N=2)<br>Radiotherapist (N=2)                                            |
|                                              | Endocrine therapy           | Unpublished concept (27 <sup>th</sup> March 2017)    | GRADE                                            | 11                                             | 4                           | 7           | 0          | 0          | 0          | None<br><br>IKNL Supervisor (N=1)* Patient representative (N=1)                  |
| <b>Colorectal cancer</b>                     | T1 carcinoma in polyp       | 16 <sup>th</sup> April 2014 (version 3)              | Evidence-based                                   | 3                                              | 1                           | 2           | 0          | 0          | 0          | Surgeon (N=1)<br>Gastroenterologist (N=1)                                        |
|                                              | Adjuvant chemotherapy       | 16 <sup>th</sup> April 2014 (version 3)              | Evidence-based                                   | 6                                              | 4                           | 2           | 0          | 0          | 0          | Oncologist (N=1)<br><br>IKNL Supervisor (N=1)* Patient representative (N=1)      |
| <b>Resectable non-small cell lung cancer</b> | Stereotactic radiotherapy   | 16 <sup>th</sup> April 2014 (version 3)              | Evidence-based (2011) and Consensus-based (2013) | 3                                              | 1                           | 1           | 0          | 1          | 0          | Radiotherapist (N=3)**                                                           |
|                                              | (Neo) adjuvant radiotherapy | 16 <sup>th</sup> April 2014 (version 3)              | Evidence-based (2011) and Consensus-based (2013) | 4                                              | 1                           | 2           | 0          | 0          | 1          | Radiotherapist (N=1)**<br><br>IKNL Supervisor (N=1)                              |
| <b>N=3</b>                                   | <b>N=6</b>                  |                                                      |                                                  | <b>N=32</b>                                    | <b>N=12</b>                 | <b>N=14</b> | <b>N=3</b> | <b>N=1</b> | <b>N=2</b> | IKNL Supervisors N=2; Patient representatives N=2; Radiotherapists N=5; Surgeons |

---

N=3; Oncologists N=1;  
Gastroenterologist N=1

---

IKNL, Netherlands Comprehensive Cancer Organisation

\*interviewed once, both about the breast cancer and the colorectal carcinoma guidelines

\*\* one radiotherapist was interviewed once about two modules of the NSCLC CPG.

For peer review only

Table 2. Quantitative overview of the results of the CPG analysis

|                                                      |                                             | Strength of recommendation |                 |           |
|------------------------------------------------------|---------------------------------------------|----------------------------|-----------------|-----------|
|                                                      |                                             | Strong                     | Weak or neutral | Total     |
|                                                      |                                             | N (%)                      | N (%)           | N (%)     |
|                                                      |                                             | <b>14 (44)</b>             | <b>18 (56)</b>  | <b>32</b> |
| <b>Trade-offs mentioned</b>                          | <b>Yes</b>                                  | 7 (50)                     | 11 (61)         | 18 (56)   |
|                                                      | <b>No</b>                                   | 7 (50)                     | 7 (39)          | 14 (44)   |
| <b>Patient preferences assessed</b>                  | <b>Yes</b>                                  | 0                          | 0               | 0         |
| <b>CPG panel's preferences mentioned</b>             | <b>Yes, explicitly</b>                      | 0                          | 0               | 0         |
|                                                      | <b>Yes, implicitly</b>                      | 10 (71)                    | 7 (39)          | 17 (53)   |
|                                                      | <b>No</b>                                   | 4 (29)                     | 11 (61)         | 15 (47)   |
| <b>Statements about patient involvement included</b> | <b>Yes, to actively involve the patient</b> | 6 (43)                     | 12 (67)         | 18 (56)   |
|                                                      | <b>Yes, to inform the patient</b>           | 0                          | 2 (11)          | 2 (6)     |
|                                                      | <b>No</b>                                   | 8 (57)                     | 4 (22)          | 12 (38)   |

**REFERENCES**

1. O'Connor AM, Legare F, Stacey D. Risk communication in practice: the contribution of decision aids. *BMJ*. 2003;327(7417):736-40.
2. Burstein HJ, Lacchetti C, Griggs JJ. Adjuvant Endocrine Therapy for Women With Hormone Receptor–Positive Breast Cancer: American Society of Clinical Oncology Clinical Practice Guideline Update on Ovarian Suppression Summary. *Journal of Oncology Practice*. 2016;12(4):390-3.
3. Early Breast Cancer Trialists' Collaborative G, Peto R, Davies C, Godwin J, Gray R, Pan HC, et al. Comparisons between different polychemotherapy regimens for early breast cancer: meta-analyses of long-term outcome among 100,000 women in 123 randomised trials. *Lancet*. 2012;379(9814):432-44.
4. Whelan T, Sawka C, Levine M, Gafni A, Reyno L, Willan A, et al. Helping patients make informed choices: a randomized trial of a decision aid for adjuvant chemotherapy in lymph node-negative breast cancer. *J Natl Cancer Inst*. 2003;95(8):581-7.
5. Shue J, Karia RJ, Cardone D, Samuels J, Shah M, Slover JD. A Randomized Controlled Trial of Two Distinct Shared Decision-Making Aids for Hip and Knee Osteoarthritis in an Ethnically Diverse Patient Population. *Value Health*. 2016;19(4):487-93.
6. Stacey D, Hawker G, Dervin G, Tugwell P, Boland L, Pomey M-P, et al. Decision aid for patients considering total knee arthroplasty with preference report for surgeons: a pilot randomized controlled trial. *BMC Musculoskeletal Disorders*. 2014;15(1):54.
7. Stacey D, Taljaard M, Dervin G, Tugwell P, O'Connor AM, Pomey MP, et al. Impact of patient decision aids on appropriate and timely access to hip or knee arthroplasty for osteoarthritis: a randomized controlled trial. *Osteoarthritis Cartilage*. 2016;24(1):99-107.
8. Hamelinck VC, Bastiaannet E, Pieterse AH, Jannink I, van de Velde CJ, Liefers GJ, et al. Patients' preferences for surgical and adjuvant systemic treatment in early breast cancer: a systematic review. *Cancer Treat Rev*. 2014;40(8):1005-18.
9. Pieterse AH, Stiggelbout AM, Baas-Thijssen MC, van de Velde CJ, Marijnen CA. Benefit from preoperative radiotherapy in rectal cancer treatment: disease-free patients' and oncologists' preferences. *Br J Cancer*. 2007;97(6):717-24.
10. Couet N, Desroches S, Robitaille H, Vaillancourt H, Leblanc A, Turcotte S, et al. Assessments of the extent to which health-care providers involve patients in decision making: a systematic review of studies using the OPTION instrument. *Health Expect*. 2015;18(4):542-61.
11. Snijders HS, Kunneman M, Bonsing BA, de Vries AC, Tollenaar RA, Pieterse AH, et al. Preoperative risk information and patient involvement in surgical treatment for rectal and sigmoid cancer. *Colorectal Dis*. 2014;16(2):O43-9.
12. Kunneman M, Branda ME, Hargraves I, Pieterse AH, Montori VM. Fostering Choice Awareness for Shared Decision Making: A Secondary Analysis of Video-Recorded Clinical Encounters. *Mayo Clin Proc Innov Qual Outcomes*. 2018;2(1):60-8.
13. Kunneman M, Engelhardt EG, Ten Hove FL, Marijnen CA, Portielje JE, Smets EM, et al. Deciding about (neo-)adjuvant rectal and breast cancer treatment: Missed opportunities for shared decision making. *Acta Oncol*. 2016;55(2):134-9.
14. Kunneman M, Marijnen CA, Rozema T, Ceha HM, Grootenboers DA, Neelis KJ, et al. Decision consultations on preoperative radiotherapy for rectal cancer: large variation in benefits and harms that are addressed. *Br J Cancer*. 2015;112(1):39-43.
15. Engelhardt EG, Pieterse AH, van der Hout A, de Haes HJ, Kroep JR, Quarles van Ufford-Mannesse P, et al. Use of implicit persuasion in decision making about adjuvant cancer treatment: A potential barrier to shared decision making. *Eur J Cancer*. 2016;66:55-66.
16. Kunneman M, Stiggelbout AM, Marijnen CA, Pieterse AH. Probabilities of benefit and harms of preoperative radiotherapy for rectal cancer: What do radiation oncologists tell and what do patients understand? *Patient Educ Couns*. 2015;98(9):1092-8.



17. Kunneman M, Marijnen CA, Baas-Thijssen MC, van der Linden YM, Rozema T, Muller K, et al. Considering patient values and treatment preferences enhances patient involvement in rectal cancer treatment decision making. *Radiother Oncol.* 2015;117(2):338-42.
18. Pieterse AH, Kunneman M, Engelhardt EG, Brouwer NJ, Kroep JR, Marijnen CAM, et al. Oncologist, patient, and companion questions during pretreatment consultations about adjuvant cancer treatment: a shared decision-making perspective. *Psychooncology.* 2017;26(7):943-50.
19. Chong CA, Chen IJ, Naglie G, Krahn MD. How well do guidelines incorporate evidence on patient preferences? *J Gen Intern Med.* 2009;24(8):977-82.
20. McCormack JP, Loewen P. Adding "value" to clinical practice guidelines. *Can Fam Physician.* 2007;53(8):1326-7.
21. de Kort SJ, Burgers JS, Willems DL. Value judgements that matter to patients remain implicit in oncology guidelines: an observational study. *Neth J Med.* 2009;67(2):62-8.
22. Krahn M, Naglie G. The next step in guideline development: incorporating patient preferences. *JAMA.* 2008;300(4):436-8.
23. McCartney M, Treadwell J, Maskrey N, Lehman R. Making evidence based medicine work for individual patients. *BMJ.* 2016;353:i2452.
24. Montori VM, Brito JP, Murad MH. The optimal practice of evidence-based medicine: incorporating patient preferences in practice guidelines. *JAMA.* 2013;310(23):2503-4.
25. Shaneyfelt TM, Centor RM. Reassessment of clinical practice guidelines: go gently into that good night. *JAMA.* 2009;301(8):868-9.
26. Alonso-Coello P, Oxman AD, Moberg J, Brignardello-Petersen R, Akl EA, Davoli M, et al. GRADE Evidence to Decision (EtD) frameworks: a systematic and transparent approach to making well informed healthcare choices. 2: Clinical practice guidelines. *BMJ.* 2016;353:i2089.
27. Alonso-Coello P, Schunemann HJ, Moberg J, Brignardello-Petersen R, Akl EA, Davoli M, et al. GRADE Evidence to Decision (EtD) frameworks: a systematic and transparent approach to making well informed healthcare choices. 1: Introduction. *BMJ.* 2016;353:i2016.
28. Andrews J, Guyatt G, Oxman AD, Alderson P, Dahm P, Falck-Ytter Y, et al. GRADE guidelines: 14. Going from evidence to recommendations: the significance and presentation of recommendations. *J Clin Epidemiol.* 2013;66(7):719-25.
29. Andrews JC, Schunemann HJ, Oxman AD, Pottie K, Meerpohl JJ, Coello PA, et al. GRADE guidelines: 15. Going from evidence to recommendation-determinants of a recommendation's direction and strength. *J Clin Epidemiol.* 2013;66(7):726-35.
30. Stiggelbout AM, Van der Weijden T, De Wit MP, Frosch D, Legare F, Montori VM, et al. Shared decision making: really putting patients at the centre of healthcare. *BMJ.* 2012;344:e256.
31. Zhang Y, Coello PA, Brozek J, Wiercioch W, Etzeandia-Ikobaltzeta I, Akl EA, et al. Using patient values and preferences to inform the importance of health outcomes in practice guideline development following the GRADE approach. *Health Qual Life Outcomes.* 2017;15(1):52.
32. Gale NK, Heath G, Cameron E, Rashid S, Redwood S. Using the framework method for the analysis of qualitative data in multi-disciplinary health research. *BMC Med Res Methodol.* 2013;13:117.
33. Pope C, Ziebland S, Mays N. Qualitative research in health care. Analysing qualitative data. *BMJ.* 2000;320(7227):114-6.
34. Friese S. Atlas.ti 7 User manual. Berlin: Atlas.ti Scientific Software Development; 2012.
35. Alexander PE, Li SA, Gionfriddo MR, Stoltzfus RJ, Neumann I, Brito JP, et al. Senior GRADE methodologists encounter challenges as part of WHO guideline development panels: an inductive content analysis. *J Clin Epidemiol.* 2016;70:123-8.
36. Casarett D. The Science of Choosing Wisely--Overcoming the Therapeutic Illusion. *N Engl J Med.* 2016;374(13):1203-5.
37. Engelhardt EG, Pieterse AH, Han PK, van Duijn-Bakker N, Cluitmans F, Maartense E, et al. Disclosing the Uncertainty Associated with Prognostic Estimates in Breast Cancer. *Med Decis Making.* 2017;37(3):179-92.

- 1  
2  
3 38. Christie B. Catherine Calderwood: champion of "realistic medicine". *BMJ*. 2016;355:i5455.
- 4 39. Ioannidis JPA. Hijacked evidence-based medicine: stay the course and throw the pirates  
5 overboard. *J Clin Epidemiol*. 2017;84:11-3.
- 6 40. Coulter A. The global reach of shared decision making 2017 [Available from:  
7 [https://blogs.bmj.com/bmj/2017/07/13/angela-coulter-the-global-reach-of-shared-decision-](https://blogs.bmj.com/bmj/2017/07/13/angela-coulter-the-global-reach-of-shared-decision-making/)  
8 [making/](https://blogs.bmj.com/bmj/2017/07/13/angela-coulter-the-global-reach-of-shared-decision-making/).
- 9 41. van der Weijden T, Pieterse AH, Koelewijn-van Loon MS, Knaapen L, Legare F, Boivin A, et al.  
10 How can clinical practice guidelines be adapted to facilitate shared decision making? A qualitative  
11 key-informant study. *BMJ Qual Saf*. 2013;22(10):855-63.
- 12 42. Agoritsas T, Merglen A, Heen AF, Kristiansen A, Neumann I, Brito JP, et al. UpToDate  
13 adherence to GRADE criteria for strong recommendations: an analytical survey. *BMJ Open*.  
14 2017;7(11):e018593.
- 15 43. Agoritsas T, Neumann I, Mendoza C, Guyatt GH. Guideline conflict of interest management  
16 and methodology heavily impacts on the strength of recommendations: comparison between two  
17 iterations of the American College of Chest Physicians Antithrombotic Guidelines. *J Clin Epidemiol*.  
18 2017;81:141-3.
- 19 44. Moreira T, May C, Mason J, Eccles M. A new method of analysis enabled a better  
20 understanding of clinical practice guideline development processes. *J Clin Epidemiol*.  
21 2006;59(11):1199-206.
- 22 45. Shaneyfelt TM, Mayo-Smith MF, Rothwangl J. Are guidelines following guidelines? The  
23 methodological quality of clinical practice guidelines in the peer-reviewed medical literature. *JAMA*.  
24 1999;281(20):1900-5.
- 25 46. Wollersheim H. Beyond the evidence of guidelines. *Neth J Med*. 2009;67(2):39-40.
- 26 47. Schunemann HJ, Wiercioch W, Brozek J, Etzeandia-Ikobaltzeta I, Mustafa RA, Manja V, et al.  
27 GRADE Evidence to Decision (EtD) frameworks for adoption, adaptation, and de novo development  
28 of trustworthy recommendations: GRADE-ADOLOPMENT. *J Clin Epidemiol*. 2017;81:101-10.
- 29  
30  
31  
32  
33  
34  
35  
36  
37  
38  
39  
40  
41  
42  
43  
44  
45  
46  
47  
48  
49  
50  
51  
52  
53  
54  
55  
56  
57  
58  
59  
60

## Standards for Reporting Qualitative Research (SRQR)\*

<http://www.equator-network.org/reporting-guidelines/srqr/>

Page/line no(s).

### Title and abstract

|                                                                                                                                                                                                                                                              |        |
|--------------------------------------------------------------------------------------------------------------------------------------------------------------------------------------------------------------------------------------------------------------|--------|
| <p><b>Title</b> - Concise description of the nature and topic of the study Identifying the study as qualitative or indicating the approach (e.g., ethnography, grounded theory) or data collection methods (e.g., interview, focus group) is recommended</p> | Page 1 |
| <p><b>Abstract</b> - Summary of key elements of the study using the abstract format of the intended publication; typically includes background, purpose, methods, results, and conclusions</p>                                                               | Page 2 |

### Introduction

|                                                                                                                                                                     |                     |
|---------------------------------------------------------------------------------------------------------------------------------------------------------------------|---------------------|
| <p><b>Problem formulation</b> - Description and significance of the problem/phenomenon studied; review of relevant theory and empirical work; problem statement</p> | Page 4              |
| <p><b>Purpose or research question</b> - Purpose of the study and specific objectives or questions</p>                                                              | Page 4, lines 39-43 |

### Methods

|                                                                                                                                                                                                                                                                                                                                                                                                             |                                                              |
|-------------------------------------------------------------------------------------------------------------------------------------------------------------------------------------------------------------------------------------------------------------------------------------------------------------------------------------------------------------------------------------------------------------|--------------------------------------------------------------|
| <p><b>Qualitative approach and research paradigm</b> - Qualitative approach (e.g., ethnography, grounded theory, case study, phenomenology, narrative research) and guiding theory if appropriate; identifying the research paradigm (e.g., postpositivist, constructivist/ interpretivist) is also recommended; rationale**</p>                                                                            | Page 4, lines 26-37<br>Page 5, lines 4-14<br>Page 7, line 27 |
| <p><b>Researcher characteristics and reflexivity</b> - Researchers' characteristics that may influence the research, including personal attributes, qualifications/experience, relationship with participants, assumptions, and/or presuppositions; potential or actual interaction between researchers' characteristics and the research questions, approach, methods, results, and/or transferability</p> | Page 6, lines 35-37                                          |
| <p><b>Context</b> - Setting/site and salient contextual factors; rationale**</p>                                                                                                                                                                                                                                                                                                                            | Page 5, lines 16-20                                          |
| <p><b>Sampling strategy</b> - How and why research participants, documents, or events were selected; criteria for deciding when no further sampling was necessary (e.g., sampling saturation); rationale**</p>                                                                                                                                                                                              | Page 5, lines 24-34<br>Page 7, lines 5-7                     |
| <p><b>Ethical issues pertaining to human subjects</b> - Documentation of approval by an appropriate ethics review board and participant consent, or explanation for lack thereof; other confidentiality and data security issues</p>                                                                                                                                                                        | Page 7, lines 8-10                                           |
| <p><b>Data collection methods</b> - Types of data collected; details of data collection procedures including (as appropriate) start and stop dates of data collection and analysis, iterative process, triangulation of sources/methods, and modification of procedures in response to evolving study findings; rationale**</p>                                                                             | Page 5, line 39 -<br>page 6, line 31<br>Page 7, lines 13-24  |

|                                                                                                    |                                                                                                                                                                                                                                                       |                                                                 |
|----------------------------------------------------------------------------------------------------|-------------------------------------------------------------------------------------------------------------------------------------------------------------------------------------------------------------------------------------------------------|-----------------------------------------------------------------|
| 1<br>2<br>3<br>4<br>5<br>6<br>7<br>8<br>9<br>10<br>11<br>12<br>13<br>14<br>15<br>16<br>17          | <b>Data collection instruments and technologies</b> - Description of instruments (e.g., interview guides, questionnaires) and devices (e.g., audio recorders) used for data collection; if/how the instrument(s) changed over the course of the study | Page 5, lines 37;<br>Page 6. Lines 33-41<br>Page 7, lines 22-24 |
| 18<br>19<br>20<br>21<br>22                                                                         | <b>Units of study</b> - Number and relevant characteristics of participants, documents, or events included in the study; level of participation (could be reported in results)                                                                        | Page 5, lines 24-25<br>Page 7, line 45-<br>page 8, line 4       |
| 23<br>24<br>25<br>26<br>27<br>28<br>29<br>30<br>31<br>32                                           | <b>Data processing</b> - Methods for processing data prior to and during analysis, including transcription, data entry, data management and security, verification of data integrity, data coding, and anonymization/de-identification of excerpts    | Page 7, line 27-36                                              |
| 33<br>34<br>35<br>36<br>37<br>38<br>39<br>40<br>41<br>42<br>43                                     | <b>Data analysis</b> - Process by which inferences, themes, etc., were identified and developed, including the researchers involved in data analysis; usually references a specific paradigm or approach; rationale**                                 | Page 6, line 41<br>Page 7, line 33-44                           |
| 44<br>45<br>46<br>47<br>48<br>49<br>50<br>51<br>52<br>53<br>54<br>55<br>56<br>57<br>58<br>59<br>60 | <b>Techniques to enhance trustworthiness</b> - Techniques to enhance trustworthiness and credibility of data analysis (e.g., member checking, audit trail, triangulation); rationale**                                                                | Page 7, lines 13-17                                             |

### Results/findings

|                                                                |                                                                                                                                                                                                   |                                         |
|----------------------------------------------------------------|---------------------------------------------------------------------------------------------------------------------------------------------------------------------------------------------------|-----------------------------------------|
| 24<br>25<br>26<br>27<br>28<br>29<br>30<br>31<br>32             | <b>Synthesis and interpretation</b> - Main findings (e.g., interpretations, inferences, and themes); might include development of a theory or model, or integration with prior research or theory | Pages 7, line 44-<br>page 11, line 18   |
| 33<br>34<br>35<br>36<br>37<br>38<br>39<br>40<br>41<br>42<br>43 | <b>Links to empirical data</b> - Evidence (e.g., quotes, field notes, text excerpts, photographs) to substantiate analytic findings                                                               | Idem (including<br>Boxes and<br>Tables) |

### Discussion

|                                                                                                    |                                                                                                                                                                                                                                                                                                                                                                                                             |                                       |
|----------------------------------------------------------------------------------------------------|-------------------------------------------------------------------------------------------------------------------------------------------------------------------------------------------------------------------------------------------------------------------------------------------------------------------------------------------------------------------------------------------------------------|---------------------------------------|
| 34<br>35<br>36<br>37<br>38<br>39<br>40<br>41<br>42<br>43                                           | <b>Integration with prior work, implications, transferability, and contribution(s) to the field</b> - Short summary of main findings; explanation of how findings and conclusions connect to, support, elaborate on, or challenge conclusions of earlier scholarship; discussion of scope of application/generalizability; identification of unique contribution(s) to scholarship in a discipline or field | Page 11, line 22<br>– page 13, line 6 |
| 44<br>45<br>46<br>47<br>48<br>49<br>50<br>51<br>52<br>53<br>54<br>55<br>56<br>57<br>58<br>59<br>60 | <b>Limitations</b> - Trustworthiness and limitations of findings                                                                                                                                                                                                                                                                                                                                            | Page 12, lines<br>29-44               |

### Other

|                                                                                              |                                                                                                                                               |                     |
|----------------------------------------------------------------------------------------------|-----------------------------------------------------------------------------------------------------------------------------------------------|---------------------|
| 45<br>46<br>47<br>48<br>49<br>50<br>51<br>52<br>53<br>54<br>55<br>56<br>57<br>58<br>59<br>60 | <b>Conflicts of interest</b> - Potential sources of influence or perceived influence on study conduct and conclusions; how these were managed | Page 3, lines 12-14 |
|                                                                                              | <b>Funding</b> - Sources of funding and other support; role of funders in data collection, interpretation, and reporting                      | Page 3, lines 8-11  |

\*The authors created the SRQR by searching the literature to identify guidelines, reporting standards, and critical appraisal criteria for qualitative research; reviewing the reference lists of retrieved sources; and contacting experts to gain feedback. The SRQR aims to improve the transparency of all aspects of qualitative research by providing clear standards for reporting qualitative research.

1  
2  
3 \*\*The rationale should briefly discuss the justification for choosing that theory, approach,  
4 method, or technique rather than other options available, the assumptions and limitations  
5 implicit in those choices, and how those choices influence study conclusions and  
6 transferability. As appropriate, the rationale for several items might be discussed together.  
7

8 **Reference:**

9 [O'Brien BC, Harris IB, Beckman TJ, Reed DA, Cook DA. Standards for reporting qualitative  
10 research: a synthesis of recommendations. \*Academic Medicine\*, Vol. 89, No. 9 / Sept 2014  
11 DOI: 10.1097/ACM.0000000000000388](#)  
12  
13  
14  
15  
16  
17  
18  
19  
20  
21  
22  
23  
24  
25  
26  
27  
28  
29  
30  
31  
32  
33  
34  
35  
36  
37  
38  
39  
40  
41  
42  
43  
44  
45  
46  
47  
48  
49  
50  
51  
52  
53  
54  
55  
56  
57  
58  
59  
60

For peer review only

# BMJ Open

## The role of patient preferences in clinical practice guidelines: a multiple methods study using guidelines from oncology as a case

|                                 |                                                                                                                                                                                                                                                                                                                                                                                                                                                                                                                                                                                                                                                                                                                                                                                                                                                                           |
|---------------------------------|---------------------------------------------------------------------------------------------------------------------------------------------------------------------------------------------------------------------------------------------------------------------------------------------------------------------------------------------------------------------------------------------------------------------------------------------------------------------------------------------------------------------------------------------------------------------------------------------------------------------------------------------------------------------------------------------------------------------------------------------------------------------------------------------------------------------------------------------------------------------------|
| Journal:                        | <i>BMJ Open</i>                                                                                                                                                                                                                                                                                                                                                                                                                                                                                                                                                                                                                                                                                                                                                                                                                                                           |
| Manuscript ID                   | bmjopen-2019-032483.R1                                                                                                                                                                                                                                                                                                                                                                                                                                                                                                                                                                                                                                                                                                                                                                                                                                                    |
| Article Type:                   | Original research                                                                                                                                                                                                                                                                                                                                                                                                                                                                                                                                                                                                                                                                                                                                                                                                                                                         |
| Date Submitted by the Author:   | 13-Sep-2019                                                                                                                                                                                                                                                                                                                                                                                                                                                                                                                                                                                                                                                                                                                                                                                                                                                               |
| Complete List of Authors:       | Gärtner , Fania; Leiden University Medical Center<br>Portielje, Johanneke; Leiden University Medical Center, Clinical Oncology<br>Langendam, Miranda; Academic Medical Center, Clinical Epidemiology, Biostatistics and Bioinformatics<br>Hairwassers, Desiree; Breast Cancer Association the Netherlands<br>Agoritsas, Thomas; University Hospitals of Geneva, Division of General Internal Medicine & Division of Clinical Epidemiology; McMaster University Faculty of Health Sciences, Department of Health Research Methods, Evidence, and Impact<br>Gijzen, Brigitte; Netherlands Comprehensive Cancer Organisation<br>Liefers, Gerrit-Jan; Leids Universitair Medisch Centrum, Surgery; Leids Universitair Medisch Centrum,<br>Pieterse, A.H. ; Leids Universitair Medisch Centrum, Medical Decision Making<br>Stiggelbout, Anne; Leiden University Medical Center |
| <b>Primary Subject Heading</b>: | Health services research                                                                                                                                                                                                                                                                                                                                                                                                                                                                                                                                                                                                                                                                                                                                                                                                                                                  |
| Secondary Subject Heading:      | Communication, Ethics, Evidence based practice, Oncology, Qualitative research                                                                                                                                                                                                                                                                                                                                                                                                                                                                                                                                                                                                                                                                                                                                                                                            |
| Keywords:                       | Protocols & guidelines < HEALTH SERVICES ADMINISTRATION & MANAGEMENT, shared decision making, evidence-based medicine, GRADE, patient preferences, choice awareness                                                                                                                                                                                                                                                                                                                                                                                                                                                                                                                                                                                                                                                                                                       |
|                                 |                                                                                                                                                                                                                                                                                                                                                                                                                                                                                                                                                                                                                                                                                                                                                                                                                                                                           |

SCHOLARONE™  
Manuscripts

## The role of patient preferences in clinical practice guidelines: a multiple methods study using guidelines from oncology as a case

FR Gärtner (1) (<https://orcid.org/0000-0002-0351-0204>), JEA Portielje (2) (<https://orcid.org/0000-0002-5169-6306>), M Langendam (3) (<https://orcid.org/0000-0001-9038-3209>), D Hairwassers (4), T Agoritsas (5,6) (<https://orcid.org/0000-0002-6182-9969>), BCM Gijzen (7) (<https://orcid.org/0000-0003-4578-0293>), GJ Liefers (8) (<https://orcid.org/0000-0001-7326-8313>), AH Pieterse (1) (<https://orcid.org/0000-0001-6395-0052>), AM Stiggelbout (1) (<https://orcid.org/0000-0002-6293-4509>)

1. Medical Decision Making, Department of Biomedical Data Sciences, Leiden University Medical Center, Leiden, The Netherlands
2. Department of Clinical Oncology, Leiden University Medical Center, Leiden, The Netherlands
3. Department of Clinical Epidemiology, Biostatistics and Bioinformatics, Amsterdam UMC, Amsterdam, The Netherlands
4. Breast Cancer Association The Netherlands (Borstkankervereniging Nederland), The Netherlands
5. Division General Internal Medicine, University Hospitals of Geneva, Geneva, Switzerland
6. Department of Health Research Methods, Evidence, and Impact, McMaster University, Hamilton, L8S 4K1, Canada
7. The Netherlands Comprehensive Cancer Organisation (IKNL), Maastricht/Utrecht, The Netherlands
8. Department of Surgery, Leiden University Medical Center, Leiden, The Netherlands

**Word count:** 4797

**Keywords:** EBM, Clinical Practice Guidelines, Shared Decision Making, patient preferences, patient-centred care, choice awareness

**Corresponding author:**

AM Stiggelbout, A.M.Stiggelbout@lumc.nl

1  
2  
3 **1 ABSTRACT (299 words)**

4 *Objectives:* Many treatment decisions are preference-sensitive, and call for shared decision-making,  
5 notably when benefits are limited or uncertain, and harms impact quality of life. We explored if  
6 clinical practice guidelines (CPGs) acknowledge preference-sensitive decisions in how they motivate  
7 and phrase their recommendations.  
8

9  
10 *Design:* We performed a qualitative analysis of the content of CPGs , and verified the results in semi-  
11 structured interviews with CPG panel members.

12 *Setting:* Dutch oncology CPGs issued in 2010 or later, concerning primary treatment with curative  
13 intent.  
14

15 *Participants:* 14 CPG panel members.

16 *Main outcomes:* For treatment recommendations from six CPG modules, two researchers extracted:  
17 strength of recommendation in terms of GRADE and its consistency with the CPG text; completeness  
18 of presentation of benefits and harms; incorporation of patient preferences; statements on the  
19 panel's benefits-harm tradeoff underlying recommendation; advice on patient involvement in  
20 decision-making.  
21

22 *Results:* We identified 32 recommendations, 18 were acknowledged preference-sensitive decisions.  
23 Three of 14 strong recommendations should have been weak based on the module text. The  
24 reporting of benefits and harms, and their probabilities, was sufficiently complete and clear to  
25 inform the strength of the recommendation in one of the six modules only. Numerical probabilities  
26 were seldom presented. None of the modules presented information on patient preferences. CPG  
27 panel's preferences were not made explicit, but appeared to have impacted 15 of 32  
28 recommendations. Advice to involve patients and their preferences in decision-making was given for  
29 20 recommendations (14 weak). Interviewees confirmed these findings. Explanations for lack of  
30 information were e.g. that clinicians know the information and that CPGs must be short.  
31 Explanations for trade-offs made were cultural-historical preferences, compliance with daily care,  
32 presumed role of CPGs, and lack of time.  
33

34 *Conclusions:* The motivation and phrasing of CPG recommendations do not stimulate choice  
35 awareness and a neutral presentation of options, thus hindering shared decision making.  
36  
37  
38  
39  
40  
41  
42  
43  
44  
45  
46  
47  
48  
49  
50  
51  
52  
53  
54  
55  
56  
57  
58  
59  
60



1  
2  
3 1 SUMMARY BOX  
4

5 2 Strengths and limitations of this study  
6

- 7
- 8 3 • Strength of the study is that we used GRADE for the qualitative analysis of the guidelines, as  
9 4 weak recommendations in GRADE reflect preference-sensitive decisions.
  - 10 5 • Strength of the study is the validation of the qualitative analysis of the guidelines in in-depth  
11 6 interviews with the guideline developers.
  - 12 7 • Limitation of the study is that we studied oncology guidelines from one country only .  
13 8

14  
15  
16 9 FUNDING  
17

18  
19 10 This work was supported by the Dutch Cancer Society grant number UL 2015-7615. The funding  
20 11 agreement ensured the authors' independence in designing the study, interpreting the data, writing,  
21 12 and publishing the report.

22  
23 13 COMPETING INTERESTS  
24

25  
26 14 TA and ML are active members of the GRADE working group. BG is employed at The Netherlands  
27 15 Comprehensive Cancer Organisation (IKNL), the organization responsible for development of the  
28 16 CPGs that were analyzed. e data, writing, and publishing the report.

29  
30 17 DATA SHARING  
31

32  
33 18 Anonymized transcripts of the interviews and extraction forms (in Dutch) may be shared upon  
34 19 reasonable request to the corresponding author.  
35

36 20  
37  
38  
39  
40  
41  
42  
43  
44  
45  
46  
47  
48  
49  
50  
51  
52  
53  
54  
55  
56  
57  
58  
59  
60

## 1. INTRODUCTION

Many decisions in healthcare are preference-sensitive, in particular when treatments are burdensome, benefits are limited or uncertain, and harms may impact quality of life.<sup>(1)</sup> Examples are decisions about adjuvant treatment in oncology (2-4) or about hip or knee arthroplasty for osteoarthritis.<sup>(5-7)</sup> Research shows that patients as well as clinicians often vary considerably in their evaluation of the balance of benefits and harms. Further, clinicians are not always able to predict their individual patients' preferences for treatments or outcomes of treatment.<sup>(8, 9)</sup> Shared decision making (SDM) is therefore advocated particularly in preference-sensitive decisions, but is not yet common practice.<sup>(10, 11)</sup> Clinicians are not prone to fostering choice awareness in their patients,<sup>(12, 13)</sup> often present treatment options in unbalanced ways, e.g., by overestimating benefits and minimizing harms,<sup>(14)</sup> or steer in other ways, consciously or unconsciously.<sup>(15)</sup> Further, numerical probabilities needed to make a trade-off are seldom discussed,<sup>(16)</sup> and patient preferences infrequently elicited.<sup>(17, 18)</sup> This raises the question if clinicians perceive these decisions as preference-sensitive? Clinical practice guidelines (CPGs) could play a role in this perception, given the impact they have on what treatment options clinicians present to their patients. While CPGs may use wording that suggests that a decision is preference-sensitive, such as "we suggest" or "clinicians might", rather than "we recommend" or "clinicians should", clinicians may still not fully appreciate the importance of offering more than one option to their patients.

It is unknown if recommendations in current CPGs identify preference-sensitive decisions and demand a role for patient preferences in decision making. Two older studies showed that the relevance of preferences of individual patients was not acknowledged in many CPGs.<sup>(19, 20)</sup> CPG developers often assume "generally accepted" values in developing recommendations, but do not acknowledge this in the phrasing of the recommendation.<sup>(21)</sup> A request for a more systematic incorporation of patient preferences in CPGs has been expressed repeatedly in high impact journals since the publications of these studies.<sup>(22-25)</sup> The Grading of Recommendations Assessment, Development, and Evaluation (GRADE) working group—whose approach is nowadays considered the standard in CPG development—has published a framework that acknowledges the integration of patients' values and preferences in the development of CPG recommendations.<sup>(26-31)</sup> In the GRADE approach, preference-sensitive decisions are reflected in so-called "weak", or "conditional" recommendations. These arise when benefits and harms are closely balanced, evidence is lacking or of uncertain quality, when patients' preferences are expected to vary substantially, but also when no evidence on patient preferences is available, even with moderate or strong evidence of high quality on the benefits of an option.<sup>(28)</sup> In such situations, GRADE still leads to weak recommendations, assuming that most informed patients would choose the recommended treatment, but a substantial number would not.<sup>(28, 29, 31)</sup> (see Box 1 for a summary of the role that GRADE proposes for patient values and preferences in CPG development)

Therefore, a key ingredient for the identification of preference-sensitive decisions is the acknowledgment of values and preferences in the rationale for CPG recommendations. The aim of our study was therefore to explore to what extent CPGs acknowledge preference-sensitive decisions in the way they support and phrase their recommendations. We further wished to assess if the CPGs facilitate the communication of the preference-sensitive nature of these decisions to patients.

>>> Insert Box 1 about here <<<

## 2. METHODS

We performed a qualitative analysis of Dutch oncologic CPGs, which we next verified and refined in semi-structured interviews with members of CPG development panels.

### 2.1 Qualitative analysis of CPGs

#### 2.1.1 Selected CPG modules

We used Dutch oncologic CPGs as a case, because oncology is strongly guideline-driven, decisions are often preference-sensitive, the guideline development process is organized nationally, and the CPGs are open access. The Netherlands Comprehensive Cancer Organisation (IKNL) develops guidelines “under responsibility of the most relevant professional or scientific society, usually following evidence-based methodology” ([www.oncoline.nl](http://www.oncoline.nl)). We selected three tumour-specific CPGs, and of each we selected all content of two modules to include in our analysis (i.e., the sections of the CPGs that address specific treatments or patient groups). We selected a convenience sample of modules for prevalent cancers that we expected to contain at least one preference-sensitive decision, calling for a weak recommendation. This expectation was based on earlier research from our group (e.g., (11, 13, 15)), views from the oncology experts on our research team, and/or on the availability of literature on SDM and decision aids for the treatment in that module. Each of the modules included more than one recommendation.

Further criteria for selection of the CPGs and the modules were: published on [www.oncoline.nl](http://www.oncoline.nl), issued in 2010 or later, and concerning primary treatment with curative intent. Table 1 presents the CPGs and modules we selected. For the breast cancer CPG, our contact person at the IKNL provided us confidentially with the most recent revision of the two selected modules, which were not yet published at the time of our analysis. In none of the modules explicit reference was made to GRADE.

#### 2.1.2 Data extraction and analysis

We assessed if the CPG acknowledges preference-sensitive decisions, and whether the user is to understand the strength of a recommendation, based on the information presented. To this aim we developed a coding scheme that consisted of the five following themes, based on the GRADE framework ((28)).

*1. Strength of recommendations:* First, we scored the strength of the recommendation (*strongly in favour/ weakly in favour/ neutral / weakly against/ strongly against* a specific option) for each treatment option described in the Recommendation section of the CPG. Scoring was solely based on the phrasing used in that section.. The categories strong and weak that we used are in line with GRADE. We added the ‘neutral’ category if a weak recommendation for more than one option was given.

Next, we assessed whether this strength of recommendation was supported by information elsewhere in the guideline, including information about the certainty of the evidence, the balance between benefits and harms and their probabilities, the variability or uncertainty in how patients value the benefits and harms, or the absence of evidence on patient preferences, even with

1 moderate or strong evidence of high quality on the benefits of an option. If other criteria were  
2 provided, we coded these as well. We extracted all information that indicated a discrepancy with the  
3 strength of recommendation, and scored whether or not textual discrepancies were identified  
4 (*yes/no*). We based this on the CPG text, and did not resort to the supporting literature.

5  
6 2. Balance of benefits and harms (trade-offs): We defined a *trade-off* as a statement presenting the  
7 balance of benefits and harms in the treatment decision, ideally based on the probability of benefits  
8 and harms, the quality of the evidence, and on how much patients value the outcomes. We  
9 extracted statements about the trade-offs made in the CPG or about the trade-offs to be made in  
10 the clinical encounter with the individual patient (*trade-offs made explicit/trade-offs not made*  
11 *explicit*). We also judged whether the presentation of outcomes was sufficiently complete and clear  
12 to inform the trade-off (*sufficient/insufficient*).

13  
14 3. Patient preferences: We assessed if patient preferences had been incorporated (*yes/no*), and if so,  
15 how (*literature search/data collection by CPG panel/other*). Also, we extracted whether explicit  
16 assumptions were made regarding patient preferences (*yes/no*).

17  
18 4. CPG panel's values and preferences: We extracted information about the preferences that  
19 supported the CPG panel's weighing of benefits and harms, and summarized per treatment  
20 recommendation if these preferences were explicitly mentioned (*yes/no*). This theme does not  
21 directly originate from the GRADE recommendations. We added it as we encountered statements  
22 suggesting that CPG panel's values and preferences had influenced the development of  
23 recommendations. Finally, we assessed if the CPGs facilitated discussion of patient preferences for  
24 weak recommendations, as for the latter "clinicians and other health care providers need to devote  
25 more time to the process of shared decision making by which they ensure that the informed choice  
26 reflects individual values".((28))

27  
28 5. Advice on how to involve the patient: We extracted statements that described how to involve an  
29 individual patient or his/her preferences in the decision making process, and summarized per  
30 recommendation if such statement was given (*yes, actively involving the patient or patient*  
31 *preferences in the decision making/yes, informing the patient/no advice about patient involvement*).

32  
33 Two coders (FG and AS) independently applied a first draft of the coding scheme to a CPG module  
34 that would not be included in the final selection. They subsequently discussed the coding process  
35 and any inconsistencies, and updated the coding scheme. They had not been involved in the  
36 development of any CPG in oncology nor GRADE, and had no existing working relationship with the  
37 members of the respective CPG panels. The coders independently applied the coding scheme to one  
38 of the selected modules, and resolved any discrepancies by consensus. Based on this discussion no  
39 further changes were made to the scheme. One researcher (FG) then coded the remaining modules,  
40 and the second checked the extraction and scoring. They discussed any inconsistency between them  
41 until agreement was reached. Data extracted was analysed descriptively.

## 42 43 44 **2.2 Semi-structured interviews with CPG developers**

### 45 2.2.1 Sampling

1 We or our IKNL contact person invited all panel members involved in the development of the  
2 selected modules for participation. Membership and size of the different CPG panels varied, not all  
3 were multidisciplinary, and not all included a patient representative. We aimed to interview at least  
4 one member of each specialty involved in the development of a module, the patient representative,  
5 and the IKNL supervisor of the CPG. As patient representatives did not participate in this study  
6 based on a paid position, the respective patient organizations received an incentive of 100 Euros.  
7 The study protocol did not require review from a medical ethics committee as no patients or lay  
8 people were recruited.

#### 9 10 2.2.2 Data collection

11 In semi-structured interviews, we first checked whether the interviewee agreed with our  
12 interpretation of the strength of recommendations, our extraction of the discrepancies found in the  
13 CPG text, of the trade-offs, and the completeness and clarity of the presentation of the benefits and  
14 harms, of the role of patient preferences, and of the preferences of the CPG panels that supported  
15 the recommendations. For the benefits, harms, and trade-offs we asked them how the developers  
16 selected which ones to present, and whether the presentation of benefits and harms aimed to  
17 facilitate communication in the clinical encounter. Finally, we discussed the function of statements  
18 concerning the involvement of patients and their preferences in decision making for the individual  
19 patient.

20 We adapted the questions to the specific content of the module to be discussed. For each  
21 subsequent interview we added or adapted questions based on earlier interviews. Interviews lasted  
22 30 to 60 minutes, were audiotaped, and transcribed verbatim. One interviewer (FG) trained in  
23 qualitative research methods and highly experienced in interviewing carried out all interviews.

#### 24 25 2.2.3 Coding and analysis

26 We adhered to the Framework Approach to code and analyse the interviews.(32, 33) The coding  
27 scheme was based on the five themes of the CPG analysis described above. First, two researchers  
28 (FG and AS) independently familiarized themselves with the data, and coded three interviews  
29 deductively, to supplement our coding scheme with any additional emerging themes. Dissimilarities  
30 in coding were discussed and codes were adapted based on consensus. Second, one researcher  
31 applied deductive coding to all other interviews and refined, and reduced the codes in a process of  
32 re-reading and constant comparison of codes. Third, categories of codes were clustered to generate  
33 (sub)themes. Steps two and three were performed by one researcher and checked by the second.  
34 Inconsistencies in interpretation of the data and formulation of codes and themes were discussed  
35 until consensus was reached. Coding was performed using Atlas.ti software.(34)

### 36 37 **2.3 Patient involvement**

38 The CPG committee involved patient representatives for two modules, and we interviewed these  
39 patients. One patient (DH) took part in the writing of the manuscript. The article will be shared with  
40 the Netherlands Federation of Cancer Patient Societies NFK.

## 41 42 **3. RESULTS**

43 We present the results of the qualitative analysis and the interviews together, structured around the  
44 five themes mentioned above. We interviewed 14 CPG panel members: 10 clinicians, two patient  
45 representatives, and two IKNL supervisors (Table 1). For one module (adjuvant endocrine therapy in

breast cancer), only one of the clinician panel members indicated to have time to participate. After an interruption due to a clinical urgency she did not want to resume the interview because she found the questions too critical. Therefore only the IKNL supervisor and the patient panel member were interviewed. Patients were not part of the CPG panel for the NSCLC modules. To illustrate our analyses we add examples of the extractions of the CPG modules in Box 2-5.

### 3.1 Strength of CPG recommendations

In the six modules we identified 32 recommendations, of which 14 were phrased as strong and 18 as weak or neutral. The proportion of weak or neutral recommendations was just over half for all modules, except for that on adjuvant chemotherapy for colorectal carcinoma, which had fewer weak recommendations (33%). For five of the recommendations, both strong (three) and weak (one) or neutral (one), we found discrepancies between the strength of recommendation and extracted sentences from the module text. Box 2 shows examples of such discrepancies. In two of the strong recommendations, the discrepancy concerned evidence that was limited or of (very) low quality.

>>> Insert Box 2 about here <<<

The CPG panel members confirmed our interpretation of the strength of recommendations. They explained that the three strong recommendations in the case of limited evidence were based on a valuation of the outcomes by the CPG panel (see further under 3.4). One explanation for the discrepancies between the strength of recommendation and the extracted were the differences in the handling of low quality evidence between methodologists and clinicians. One clinician described methodologists as being more careful in drawing conclusions, while clinicians incorporate current standards of practice in the formulation of recommendations.

*Panel member: I think that it is inherent to making recommendations, where clinicians and methodologists clash. I am currently preparing the revision of the guideline, and what one sees is that we simply clash immediately with the methodologists in the preparation of the revision. Those are very dogmatic in their methodologic thinking. And the problem is, that that does not work, particularly not for the medical literature, so to say. And that is why the GRADE methodology explicitly discusses that in their approach, that one can upgrade the recommendation if one agrees as professional group that something should or should not be done.*  
(Interview 10 ,about T1 carcinoma in polyp)

### 3.2 Information supporting the balance of benefits and harms

Three of the modules (T1 carcinoma in polyp and adjuvant chemotherapy in colorectal cancer, stereotactic radiotherapy in NSCLC) included explicit trade-off statements (see Box 3). Probabilities of outcomes were mentioned in one of these, but for the benefits only. One trade-off statement substantiating a strong recommendation included the presentation of a value judgment, but it was unclear whose values it presented “it is agreed upon that it is safe ...,” and “the risk of radiation pneumonitis seems acceptable”.

For one of the six modules, adjuvant chemotherapy for colorectal cancer, we rated the report of benefits and harms and their probabilities as sufficiently complete and clear to inform the strength of recommendation. In three modules information was lacking about benefits, in four about harms, and harms were often only presented generically (e.g., “complications”, “psychological impact”).

1  
2  
3 1 Relative rather than absolute risk reduction was often presented, verbal labels rather than numbers  
4 2 were used to convey risk, e.g., *“The chance of eventually preserving the breast is higher if radiation*  
5 3 *of the breast already takes place after the first excision”*.

6 4  
7 4  
8 5 >>> Insert Box 3 about here <<<

9 6  
10 7 Some interviewees found that transparency about the trade-offs in the CPG text could be improved,  
11 8 while others found an explicit mention, including details about benefits and harms and their  
12 9 probabilities, unnecessary. Reasons for the latter were time constraints, the aim to keep the CPG  
13 10 short, the assumption that CPG-users know the balance of benefits and harms, or that the weighting  
14 11 of benefits and harms was acceptable to everyone. One interviewee, e.g., stated that not  
15 12 recommending endocrine treatment in DCIS was “common knowledge” and that *“we also could*  
16 13 *have chosen to just leave out the whole paragraph about this adjuvant therapy, to just not mention it*  
17 14 *at all.”* (Interview 15)

18 15  
19 16 The interviewees indicated that in none of the modules patients had been involved in the selection  
20 17 of the outcomes described. Some acknowledged that outcomes might be missing, but a substantial  
21 18 number did not regard a complete presentation of outcomes and their probabilities as necessary,  
22 19 using the following arguments: guidelines should be short, harms are assumed to be common  
23 20 knowledge for clinicians or might be presented in other modules, evidence for long-term harms is  
24 21 lacking, and probabilities from the literature are not applicable to the Dutch setting or would only be  
25 22 representative at the hospital level, not at that of the individual clinician (i.e., for mortality due to  
26 23 surgery). Several interviewees were especially reticent to present probabilities in terms of absolute  
27 24 risk reduction, as those percentages would soon be dated, differed between patient groups, or  
28 25 would be too time-consuming to calculate. One stated to have argued to include Numbers Needed  
29 26 to Treat in the CPG, to no avail.

30 27  
31 28 **Interviewer:** *and for what reason is the other side of the coin not mentioned in the CPG?*  
32 29 *You indicated, already, that actually...*

33 30 **Panel-member:** *the CPG is mostly written to, what we provide as recommendation*  
34 31 *towards the patient, for the outcome of treatment. I don't know if the CPG is written at*  
35 32 *least, I have never interpreted it as such, but I don't know if one should put in the CPG,*  
36 33 *let's say, what's it called, all risks of treatment. That differs per agent, have different*  
37 34 *risks. And then the CPG becomes much more extensive. But that is also the baseline*  
38 35 *knowledge that every oncologist should have.*

39 36 (Interview 7, about adjuvant chemotherapy for colon carcinoma)

### 40 37 41 38 **3.3 Patient preferences**

42 39 None of the modules stated that evidence about patient preferences had been searched for or  
43 40 elicited. No information was presented about generic patient preferences, or about variation in  
44 41 patient preferences, either from the literature or assumed by the panel.

45 42  
46 43 Some interviewees acknowledged that patient preferences may vary and may differ from clinician  
47 44 preferences, and they stressed that the awareness of such variation sometimes motivated a weak  
48 45 recommendation. Reasons not to include information about patient preferences were: time and  
49 46 capacity constraints, the assumption that no evidence exists, or lack of awareness that this

1 information is to be included. Others were reluctant to include information about preference  
 2 variation, because it could threaten the relationship between specialties (if this information would  
 3 lead to patients choosing against the generally accepted treatment modality). Numerous  
 4 assumptions about patient preferences were voiced, such as that patients prefer lumpectomy to  
 5 mastectomy, length of life to quality of life, and active treatment to refraining from treatment.  
 6 Interviewees also stressed that if patients have a strong preference, they will express it anyway.

### 8 **3.4 CPG panels' values and preferences**

9 None of the modules explicitly labelled statements as presenting the CPG panel's values and  
 10 preferences that underlie their weighing of the benefits and harms. We found implicit reference to  
 11 CPG panels' preferences, having influenced the development of the recommendation in 15/32  
 12 recommendations (see Box 4). These preferences concerned 9/14 strong recommendations and  
 13 6/18 weak recommendations (see Table 2).

14 >>> Insert Box 4 about here <<<

15 As described under 3.1, the interviewees sometimes explained discrepancies between the strength  
 16 of recommendation and the extracted information by the CPG panel's valuation of the outcomes.  
 17 Explanations for the panel members' preferences beyond the evidence were: compliance with daily  
 18 practice; the organisation of care; culture (a preference for radiotherapy seemed more culturally  
 19 and historically determined than evidence-based); and concerns about keeping a good relationship  
 20 between specialties when their treatments compete.

21 Some interviewees found that CPG panels' preferences underlying the weighing of benefits and  
 22 harms should be made explicit. One interviewee stated that having an external party critically  
 23 reviewing the CPGs before publication would foster this. The panel members often expressed their  
 24 own preference for active treatment versus refraining from (further) treatment or active  
 25 surveillance, even at the expense of over-treating a substantial part of the patient population.

26 ***Panel member:** That is watertight, radiotherapy does have an effect. Not for everyone,  
 27 far from it, but for some. And we cannot sufficiently select for whom it does, so we say,  
 28 give radiation to all.*

29 (Interview 4, about radiotherapy for DCIS patients)

30 Their motivation was mostly a strong belief in survival gain for a subgroup that cannot be identified  
 31 as of yet. In these instances, panel preferences for active treatment had influenced the balancing of  
 32 benefits and harms, such that a recommendation for active treatment would not be a weak one.

33 This was argued e.g. for treatment aimed at reducing local recurrence rates without concomitant  
 34 survival gain. Concerning this example, an interviewee argued in one instance that it was preferable  
 35 simply to not include survival as an outcome, as no survival gain was possible given the already high  
 36 survival (Interview 2, about radiotherapy for DCIS).

37 ***Panel member:** ... but I find it a bit of a bromide to say that DCIS, or rather that  
 38 radiotherapy for DCIS yields no survival benefit and therefore we shouldn't do it. Because  
 39 one cannot improve upon 99 % survival benefit. The important thing is, in which sub-  
 40 groups those recurrences occur that might not be such nice recurrences, that call for a lot  
 41 more treatment and the like....*





1 preferences, such as those for intervening and prolonging life, were not mentioned in the guidelines  
2 but had played an important role in determining final recommendations. In line with a study by  
3 Alexander et al. (35), it appeared that panel members find it difficult to refrain from providing a clear  
4 recommendation in a case of limited or conflicting evidence. CPG panel preferences for active  
5 treatment had influenced the way the panel had balanced benefits and harms, such that a  
6 recommendation for active treatment would be strong and overtreatment likely. The strong belief in  
7 survival gain for a subgroup that cannot be identified as of yet fosters the so-called therapeutic  
8 illusion, in which both physicians and patients overestimate the benefits of treatment, since patients  
9 are seemingly cured by treatment while they might have had the same outcome without  
10 treatment.(36) Rather than routinely resort to active treatment in these instances, the discussion  
11 should be opened on how to deal with such uncertainties. Little research is available yet on how best  
12 to communicate uncertainty,(37) but this does not relieve us from the obligation to discuss matters  
13 honestly with patients. Such openness would contribute to reducing unnecessary treatment,  
14 addressing unacceptable variation, and delivering more appropriate, personalised care.(38)  
15 Guidelines can facilitate this discussion by acknowledging preference-sensitive decisions, and  
16 encouraging users to become more aware of choice and presenting multiple options to patients.

17  
18 A limitation of the format of GRADE, is that it asks for a dichotomous categorization (*weak vs.*  
19 *strong*) and a recommendation either *for* or *against*. This categorization makes it difficult to  
20 explicitly state that multiple options are medically reasonable. Furthermore, information on patient  
21 preferences should be more often sought in guideline development. Oncologist experts are invited  
22 in guideline panels because of their content expertise, but this involves a risk when more evidence is  
23 available for benefits than for harms, and when there is no evidence on patient preferences. Then  
24 chances increase that that panel members resort to their own preferences, often favouring active  
25 treatment and neglecting harms.(39) The guideline development process, while aiming at achieving  
26 EBM, may threaten it by its reliance on expert judgment at the expense of involving patient  
27 preferences. GRADE publications accede that panels' judgements of patient preferences often rely  
28 on their interactions with patients, but how well such judgements correspond to typical values and  
29 preferences is uncertain.

30  
31 We do not know to what extent our analysis will hold for CPGs from other countries than the  
32 Netherlands. Dutch healthcare is likely less paternalistic than that in many other countries, and the  
33 Netherlands are leading in the implementation of SDM(40). We therefore expect more discrepancies  
34 between evidence and recommendations to arise elsewhere. De Kort et al.,(21) analysed a sample of  
35 evidence-based oncology guidelines from other countries, and found that recommendations were  
36 rarely explained and value judgements were not made explicit either. Further, we do not know if,  
37 but have no reason to expect that our findings will be different for other specialties. We urge  
38 researchers in other countries and other fields to evaluate their guidelines with preference-  
39 sensitivity in mind as well.

40  
41 An analysis like the one performed runs the risk of subjectivity, as the data extraction and coding  
42 requires interpretation. We therefore checked our results with the developers of the guidelines we  
43 studied. This provided a validation of our analysis. The aim of this endeavour was to highlight an  
44 issue that is a major barrier to patient-centred care and SDM in particular.(41) With the strong

1  
2  
3 1 current call for patient involvement, worldwide, it is important to establish to what extent guidelines  
4 2 potentially hinder such involvement, and our study may be seen as a first step in that direction.  
5 3

6 4  
7 4 In sum, our analysis points to a lack of transparency in the CPG development process about benefits  
8 5 and harms and their probabilities, the preferences of the guideline panel members, and their  
9 6 assumptions about patient preferences. Awareness needs to be created among CPG-developers that  
10 7 their judgments of the balance of benefits and harms are value-laden, and that variation exists in  
11 8 these judgments, among both clinicians and patients. Clear instructions and training to enhance  
12 9 knowledge and implementation of GRADE might improve the acknowledgement of preference-  
13 10 sensitive decisions in guidelines and support shared decision making. This will help avoid what  
14 11 McCartney feared in his 2016 Analysis in the BMJ: "there is the danger of guideline  
15 12 recommendations being applied to people who do not place the same values on those  
16 13 recommendations as their clinician (...)" (23)  
17 14  
18 15  
19 16

#### 20 17 **ACKNOWLEDGEMENTS**

21 18 We thank all interviewees for their participation in this study.  
22 19

#### 23 20 **AUTHORS CONTRIBUTION**

24 21 FRG, AHP, JEAP, and AMS designed the study. FRG, DH, BCMG, GJL and AMS were involved in  
25 22 acquisition of the data, FRG and AMS conducted the data extraction. FRG, ML, DH, TA, GJL, AHP, and  
26 23 AMS were involved in interpreting the results.  
27 24 FRG and AMS wrote the first drafts and final version of the manuscript. JEAP, ML, DH, TA, BCMG,  
28 25 GJL, and AHP have read the manuscript critically, made improvements to the content and wording of  
29 26 the work.  
30 27 FRG, JEAP, ML, DH, TA, BCMG, GJL, AHP, and AMS all agreed to the final version.  
31 28 The corresponding author attests that all listed authors meet authorship criteria and that no others  
32 29 meeting the criteria have been omitted.  
33 30  
34 31

#### 35 32 **EXCLUSIVE LICENCE STATEMENT**

36 33 The Corresponding Author has the right to grant on behalf of all authors and does grant on behalf of  
37 34 all authors, a worldwide licence to the Publishers and its licensees in perpetuity, in all forms, formats  
38 35 and media (whether known now or created in the future), to i) publish, reproduce, distribute, display  
39 36 and store the Contribution, ii) translate the Contribution into other languages, create adaptations,  
40 37 reprints, include within collections and create summaries, extracts and/or, abstracts of the  
41 38 Contribution and convert or allow conversion into any format including without limitation audio, iii)  
42 39 create any other derivative work(s) based in whole or part on the on the Contribution, iv) to exploit  
43 40 all subsidiary rights to exploit all subsidiary rights that currently exist or as may exist in the future in  
44 41 the Contribution, v) the inclusion of electronic links from the Contribution to third party material  
45 42 where-ever it may be located; and, vi) licence any third party to do any or all of the above.  
46 43

1  
2  
3  
4  
5  
6  
7  
8  
9  
10  
11  
12  
13  
14  
15  
16  
17  
18  
19  
20  
21  
22  
23  
24  
25  
26  
27  
28  
29  
30  
31  
32  
33  
34  
35  
36  
37  
38  
39  
40  
41  
42  
43  
44  
45  
46  
47  
48  
49  
50  
51  
52  
53  
54  
55  
56  
57  
58  
59  
60

**Box 1: The GRADE approach and GRADE's proposed role of patient values and preferences in CPG recommendation development:**

GRADE offers an approach to rate the certainty in the evidence and strength of recommendations, in which *strong* and *weak* (also known as *conditional*) recommendations are distinguished.

Consideration of patient preferences is a crucial step in deciding on the strength of the recommendation. According to the GRADE approach, first, the best estimates of effect for the interventions and the certainty in this evidence (quality of the evidence) is assessed, using up-to-date systematic reviews. Further, the CPG panel should consider a number of criteria that influence the strength of recommendations, such as variability or uncertainty in how patients value the main outcomes (both benefits and harms), the balance between benefits and harms, and considerations of resource use, health equity, feasibility and acceptability (from both stakeholder and patient perspective) of an intervention.(26-30) Based on an overall assessment across these criteria, CPG panels reach a conclusion about the direction of their recommendation (for or against the intervention) and the strength of their recommendation: strong or weak.(26) A high level of certainty across the criteria (such as high quality evidence, clear balance between benefits and harms, no uncertainty in patient preferences) allows for strong recommendations. A high level of uncertainty, i.e., preference-sensitive decisions, leads to weak recommendations: there is more than one single best option available, there is important uncertainty or variability in patient preferences, or the benefits and harms are closely balanced. Tension has been shown to occur between adherence to GRADE and the wish to make a strong recommendation out of conviction that a treatment is beneficial, despite the evidence quality or certainty being (very) low.(42)

To guarantee the acknowledgement of patient preferences in the development of recommendations, the GRADE strategy asks to clearly present i) how substantial benefits and harms are, what their balance is, and what the overall certainty of the evidence on these outcomes is, and ii) if there is uncertainty about or variability in how much patients value the important outcomes.(26, 27, 43) In other papers GRADE recommends guideline developers to make transparent and explicit statements iii) about the (variability in) patient values and preferences, as well as CPG panel assumptions of these values and preferences on which decisions on the strength of recommendations are based, in order to be able to judge the applicability of recommendations for decision making with the individual patient.(28, 29)

1  
2  
3 **Box 2. Examples of textual discrepancies between strength of recommendation and statements in**  
4 **other parts of the CPG module**  
5  
6  
7  
8

9  
10 **1. Strongly phrased recommendation for adjuvant radiotherapy after lumpectomy in DCIS**  
11 **patients, combined with a statement about the relevance of patient involvement in the decision:**

12 Recommendation

13 *"After complete excision of DCIS, radiotherapy of the whole chest wall (with or without boost) is*  
14 *recommended."* (Section: Recommendations, module 1)

15 Statement about patient involvement

16 *"Individual risk assessment and good deliberation with the informed patient determine whether*  
17 *radiotherapy is applied, with or without boost."* (Section: Recommendations, module 1)

18  
19  
20 **2. Strongly-phrased recommendation for adjuvant chemotherapy for patients with an MSI colon**  
21 **carcinoma, combined with a statement about very low-quality evidence.**

22 Recommendation

23 *"It is recommended that patients with an MSI carcinoma are offered only fluoropyrimidine-*  
24 *oxaliplatin-based chemotherapy."* (Section: Recommendations, module 4)

25 Statement about the evidence

26 *"The limited evidence concerning the value of oxaliplatin-based chemotherapy in this group shows*  
27 *no difference compared to patients with MSS tumours, so for patients with stage III MSI tumours,*  
28 *oxaliplatin-based chemotherapy remains recommended for now."* (Section: Literature review,  
29 module 4)  
30  
31  
32

33  
34  
35  
36  
37  
38  
39  
40  
41  
42  
43  
44  
45  
46  
47  
48  
49  
50  
51  
52  
53  
54  
55  
56  
57  
58  
59  
60

1  
2  
3 **1 Box 3: Extracted trade-off statements**  
4  
5

6 **Trade-off statement for a strong recommendation:**

- 7 • *It is generally agreed upon that a dose of 45–60 Gy in 3 fractions is safe and can achieve good (> 80%) local tumour control. The risk of radiation pneumonitis appears to be acceptable. However, long-term data on the late toxicity of SBRT is lacking, especially for T2 tumours. Evidence pertaining to quality of life is likewise sparse. (Conclusions, module 3a)*

12 **Trade-off statements for weak recommendations:**

- 13 • *Additional surgical resection after endoscopic removal of a malignant polyp should always be a balanced decision because of the relative high number needed to treat, for which the patient should always be fully informed about the potential oncologic benefit on the one hand and the risk of complications on the other (Recommendations, module 2a, used for weak recommendations)*
- 14 • *In various case-series, the incidence of local lymph node metastases in T1 colorectal carcinoma varies from 8 to 14 %.<sup>654 1082 1259</sup> There is also a large chance that surgical (segmental) resection of the colon has no therapeutic benefits, while being associated with morbidity and even mortality. Hence, it is important to make a well-considered choice for the treatment of malignant polyps.” (Section: Literature review, module 2a)*
- 15 • *For high risk malignant colon polyps the oncologic benefit of additional resection should be balanced against the risk of morbidity and possibly even mortality. In this trade-off the age, tumor location, comorbidity of the patient, and the preference of the patient should be taken into account. All patients should be discussed in the multidisciplinary team. (Section: Considerations, module 2a, used for weak recommendations)*
- 16 • *A retrospective subgroup analysis of the MOSAIC studying patients with Stage II colon carcinoma has shown that adding oxaliplatin to a fluoropyrimidine does not convey significant gain in dFS and OS. It seems useful to educate patients with high risk Stage II colon carcinoma about the possible advantages of adjuvant chemotherapy and the concomitant side effects. (Section: literature review, module 2b, used for weak recommendation) ]*
- 17 • *Treatment of centrally-located tumours is still under debate, given its high toxicity (Conclusions, module 3a, used for weak recommendation)*

18  
19  
20  
21  
22  
23  
24  
25  
26  
27  
28  
29  
30  
31  
32  
33  
34  
35  
36  
37  
38  
39  
40  
41  
42 **2**  
43  
44  
45  
46  
47  
48  
49  
50  
51  
52  
53  
54  
55  
56  
57  
58  
59  
60

1  
2  
3 **1 Box 4: Examples of CPG panels' values or preferences reflected in the CPG modules**  
4

| CPG statement on which the interpretation of the panel's preference is based.                                                                                                                                                                                                                | Description of the identified CPG panel's preference                                                                                                                                                                                                                                                                                                                                                                                                                                                                                                                                                                                                  | Concerning what type of recommendation |
|----------------------------------------------------------------------------------------------------------------------------------------------------------------------------------------------------------------------------------------------------------------------------------------------|-------------------------------------------------------------------------------------------------------------------------------------------------------------------------------------------------------------------------------------------------------------------------------------------------------------------------------------------------------------------------------------------------------------------------------------------------------------------------------------------------------------------------------------------------------------------------------------------------------------------------------------------------------|----------------------------------------|
| <i>If breast-conserving surgery is not feasible or desirable, there is an indication for mastectomy. (Section: Literature review, module 1)</i>                                                                                                                                              | The panel appears to prefer breast-sparing surgery to mastectomy; mastectomy is considered only when breast-sparing surgery is not feasible or desirable.                                                                                                                                                                                                                                                                                                                                                                                                                                                                                             | <i>2 weak</i>                          |
| <i>DCIS is often discovered based on calcifications on the mammogram that, when biopsied, turn out to be associated with this DCIS. DCIS does not metastasize, and patients with DCIS hence have an excellent prognosis with adequate local treatment. (Section: Introduction, module 1)</i> | The panel prefers local treatment and therefore has a more positive attitude about radiotherapy and a less positive attitude about endocrine therapy for DCIS from the outset. (Supplemental note: no survival benefit has been demonstrated for either radiotherapy or endocrine therapy. It is, however, suspected that a subgroup of the radiotherapy group does indeed have improved survival. Radiotherapy also has an effect on the risk reduction of an invasive recurrence, which appears to be more limited with endocrine therapy. This could be a reason for the more positive attitude toward radiotherapy compared to endocrine therapy) | <i>1 strong</i>                        |
| <i>The risk of radiation pneumonitis seems to be acceptable (Section: Conclusions, module 5)</i>                                                                                                                                                                                             | The panel finds the risk of radiation pneumonitis acceptable. In the literature, this risk is only represented in chance words: the risk is "very low" and "generally low". The reader is shown neither the absolute risk or patient preferences relevant to this trade-off.                                                                                                                                                                                                                                                                                                                                                                          | <i>1 strong and 1 weak</i>             |
| <i>Radiotherapy hence appears to be effective, considering that without adjuvant radiotherapy the risk of recurrence is expected to be higher and the chance of cure to be lower. (Section: Literature review, module 6)</i>                                                                 | In case of positive surgical margins, there is a strong recommendation in favour of adjuvant radiotherapy, arising from the assumption that the benefits outweigh the disadvantages. The phrase "appears to be effective" is used, but the guideline does not state the absolute survival gain and does not address side effects, short term or long term. Furthermore, we do not know if patients differ in how they weigh these considerations.                                                                                                                                                                                                     | <i>1 strong</i>                        |

2  
3  
4  
5

1  
2  
3 **1 Box 5: Examples of phrasings about the patient role**  
4  
5

6 **Statements that propose to inform the patient:**

- 7 1. *Additional surgical resection after endoscopic removal of a malignant polyp should always*  
8 *be a considered decision, given the relatively high 'number needed to treat', in which the*  
9 *patient must be fully informed about the possible oncological benefit on the one hand and*  
10 *the risk of complications on the other. (Section: Recommendations, module 3)*  
11 2. *It appears worthwhile to inform patients with a high-risk stage II colorectal carcinoma*  
12 *about the possible advantages of adjuvant chemotherapy and the associated side-effects.*  
13 *(Section: Literature review, module 4)*  
14

15  
16 **Statements that propose to include the patient's preferences in making the decision:**

- 17 1. *Side-effects and effectiveness of both endocrine therapy and radiotherapy should be*  
18 *weighed together with the patient. (Section: Recommendations, module 1)*  
19 2. *For high-risk malignant colon polyps, the oncological benefit of additional colon resection*  
20 *should always be weighed against the risk of morbidity and even mortality. Age, tumour*  
21 *location, comorbidity, and the patient's preference should be included in this trade-off.*  
22 *(Section: Considerations, module 3)*  
23  
24  
25

26  
27  
28  
29  
30  
31  
32  
33  
34  
35  
36  
37  
38  
39  
40  
41  
42  
43  
44  
45  
46  
47  
48  
49  
50  
51  
52  
53  
54  
55  
56  
57  
58  
59  
60

2



1  
2  
3  
4  
5  
6  
7  
8  
9  
10  
11  
12  
13  
14  
15  
16  
17  
18  
19  
20  
21  
22  
23  
24  
25  
26  
27  
28  
29  
30  
31  
32  
33  
34  
35  
36  
37  
38  
39  
40  
41  
42  
43  
44  
45  
46

**Table 1:** Overview of CPGs and modules analysed, number of interviews, and role and speciality of interviewees.

| Localisation                                 | Module                      | Publication date                                     | Approach                                         | Number of options discussed in recommendations | Strength of recommendations |      |         |         |        | Role and speciality of interviewees <sup>§</sup>                            |
|----------------------------------------------|-----------------------------|------------------------------------------------------|--------------------------------------------------|------------------------------------------------|-----------------------------|------|---------|---------|--------|-----------------------------------------------------------------------------|
|                                              |                             |                                                      |                                                  |                                                | In favour                   |      | Neutral | Against |        |                                                                             |
|                                              |                             |                                                      |                                                  |                                                | Strong                      | Weak |         | Weak    | strong |                                                                             |
| <b>Breast cancer</b>                         | DCIS                        | Unpublished concept (27 <sup>th</sup> February 2017) | GRADE                                            | 5                                              | 1                           | 0    | 3       | 0       | 1      | Surgeon (N=2)<br>Radiotherapist (N=2)                                       |
|                                              | Endocrine therapy           | Unpublished concept (27 <sup>th</sup> March 2017)    | GRADE                                            | 11                                             | 4                           | 7    | 0       | 0       | 0      | None<br><br>IKNL Supervisor (N=1)* Patient representative (N=1)             |
| <b>Colorectal cancer</b>                     | T1 carcinoma in polyp       | 16 <sup>th</sup> April 2014 (version 3)              | Evidence-based                                   | 3                                              | 1                           | 2    | 0       | 0       | 0      | Surgeon (N=1)<br>Gastroenterologist (N=1)                                   |
|                                              | Adjuvant chemotherapy       | 16 <sup>th</sup> April 2014 (version 3)              | Evidence-based                                   | 6                                              | 4                           | 2    | 0       | 0       | 0      | Oncologist (N=1)<br><br>IKNL Supervisor (N=1)* Patient representative (N=1) |
| <b>Resectable non-small cell lung cancer</b> | Stereotactic radiotherapy   | 16 <sup>th</sup> April 2014 (version 3)              | Evidence-based (2011) and Consensus-based (2013) | 3                                              | 1                           | 1    | 0       | 1       | 0      | Radiotherapist (N=3)**                                                      |
|                                              | (Neo) adjuvant radiotherapy | 16 <sup>th</sup> April 2014 (version 3)              | Evidence-based (2011) and Consensus-based (2013) | 4                                              | 1                           | 2    | 0       | 0       | 1      | Radiotherapist (N=1)**<br><br>IKNL Supervisor (N=1)                         |

---

|            |            |             |             |             |            |            |            |                                                                                                                                           |
|------------|------------|-------------|-------------|-------------|------------|------------|------------|-------------------------------------------------------------------------------------------------------------------------------------------|
| <b>N=3</b> | <b>N=6</b> | <b>N=32</b> | <b>N=12</b> | <b>N=14</b> | <b>N=3</b> | <b>N=1</b> | <b>N=2</b> | IKNL Supervisors N=2; Patient<br>representatives N=2;<br>Radiotherapists N=5; Surgeons<br>N=3; Oncologists N=1;<br>Gastroenterologist N=1 |
|------------|------------|-------------|-------------|-------------|------------|------------|------------|-------------------------------------------------------------------------------------------------------------------------------------------|

---

IKNL, Netherlands Comprehensive Cancer Organisation

\*interviewed once, both about the breast cancer and the colorectal carcinoma guidelines

\*\* one radiotherapist was interviewed once about two modules of the NSCLC CPG.

For peer review only

Table 2. Quantitative overview of the results of the CPG analysis

|                                                      |                                             | Strength of recommendation |                 |           |
|------------------------------------------------------|---------------------------------------------|----------------------------|-----------------|-----------|
|                                                      |                                             | Strong                     | Weak or neutral | Total     |
|                                                      |                                             | N (%)                      | N (%)           | N (%)     |
|                                                      |                                             | <b>14 (44)</b>             | <b>18 (56)</b>  | <b>32</b> |
| <b>Trade-offs mentioned</b>                          | <b>Yes</b>                                  | 7 (50)                     | 11 (61)         | 18 (56)   |
|                                                      | <b>No</b>                                   | 7 (50)                     | 7 (39)          | 14 (44)   |
| <b>Patient preferences assessed</b>                  | <b>Yes</b>                                  | 0                          | 0               | 0         |
| <b>CPG panel's preferences mentioned</b>             | <b>Yes, explicitly</b>                      | 0                          | 0               | 0         |
|                                                      | <b>Yes, implicitly</b>                      | 10 (71)                    | 7 (39)          | 17 (53)   |
|                                                      | <b>No</b>                                   | 4 (29)                     | 11 (61)         | 15 (47)   |
| <b>Statements about patient involvement included</b> | <b>Yes, to actively involve the patient</b> | 6 (43)                     | 12 (67)         | 18 (56)   |
|                                                      | <b>Yes, to inform the patient</b>           | 0                          | 2 (11)          | 2 (6)     |
|                                                      | <b>No</b>                                   | 8 (57)                     | 4 (22)          | 12 (38)   |

**REFERENCES**

1. O'Connor AM, Legare F, Stacey D. Risk communication in practice: the contribution of decision aids. *BMJ*. 2003;327(7417):736-40.
2. Burstein HJ, Lacchetti C, Griggs JJ. Adjuvant Endocrine Therapy for Women With Hormone Receptor-Positive Breast Cancer: American Society of Clinical Oncology Clinical Practice Guideline Update on Ovarian Suppression Summary. *Journal of Oncology Practice*. 2016;12(4):390-3.
3. Early Breast Cancer Trialists' Collaborative G, Peto R, Davies C, Godwin J, Gray R, Pan HC, et al. Comparisons between different polychemotherapy regimens for early breast cancer: meta-analyses of long-term outcome among 100,000 women in 123 randomised trials. *Lancet*. 2012;379(9814):432-44.
4. Whelan T, Sawka C, Levine M, Gafni A, Reyno L, Willan A, et al. Helping patients make informed choices: a randomized trial of a decision aid for adjuvant chemotherapy in lymph node-negative breast cancer. *J Natl Cancer Inst*. 2003;95(8):581-7.
5. Shue J, Karia RJ, Cardone D, Samuels J, Shah M, Slover JD. A Randomized Controlled Trial of Two Distinct Shared Decision-Making Aids for Hip and Knee Osteoarthritis in an Ethnically Diverse Patient Population. *Value Health*. 2016;19(4):487-93.
6. Stacey D, Hawker G, Dervin G, Tugwell P, Boland L, Pomey M-P, et al. Decision aid for patients considering total knee arthroplasty with preference report for surgeons: a pilot randomized controlled trial. *BMC Musculoskeletal Disorders*. 2014;15(1):54.
7. Stacey D, Taljaard M, Dervin G, Tugwell P, O'Connor AM, Pomey MP, et al. Impact of patient decision aids on appropriate and timely access to hip or knee arthroplasty for osteoarthritis: a randomized controlled trial. *Osteoarthritis Cartilage*. 2016;24(1):99-107.
8. Hamelinck VC, Bastiaannet E, Pieterse AH, Jannink I, van de Velde CJ, Liefers GJ, et al. Patients' preferences for surgical and adjuvant systemic treatment in early breast cancer: a systematic review. *Cancer Treat Rev*. 2014;40(8):1005-18.
9. Pieterse AH, Stiggelbout AM, Baas-Thijssen MC, van de Velde CJ, Marijnen CA. Benefit from preoperative radiotherapy in rectal cancer treatment: disease-free patients' and oncologists' preferences. *Br J Cancer*. 2007;97(6):717-24.
10. Couet N, Desroches S, Robitaille H, Vaillancourt H, Leblanc A, Turcotte S, et al. Assessments of the extent to which health-care providers involve patients in decision making: a systematic review of studies using the OPTION instrument. *Health Expect*. 2015;18(4):542-61.
11. Snijders HS, Kunneman M, Bonsing BA, de Vries AC, Tollenaar RA, Pieterse AH, et al. Preoperative risk information and patient involvement in surgical treatment for rectal and sigmoid cancer. *Colorectal Dis*. 2014;16(2):O43-9.
12. Kunneman M, Branda ME, Hargraves I, Pieterse AH, Montori VM. Fostering Choice Awareness for Shared Decision Making: A Secondary Analysis of Video-Recorded Clinical Encounters. *Mayo Clin Proc Innov Qual Outcomes*. 2018;2(1):60-8.
13. Kunneman M, Engelhardt EG, Ten Hove FL, Marijnen CA, Portielje JE, Smets EM, et al. Deciding about (neo-)adjuvant rectal and breast cancer treatment: Missed opportunities for shared decision making. *Acta Oncol*. 2016;55(2):134-9.
14. Kunneman M, Marijnen CA, Rozema T, Ceha HM, Grootenboers DA, Neelis KJ, et al. Decision consultations on preoperative radiotherapy for rectal cancer: large variation in benefits and harms that are addressed. *Br J Cancer*. 2015;112(1):39-43.
15. Engelhardt EG, Pieterse AH, van der Hout A, de Haes HJ, Kroep JR, Quarles van Ufford-Mannesse P, et al. Use of implicit persuasion in decision making about adjuvant cancer treatment: A potential barrier to shared decision making. *Eur J Cancer*. 2016;66:55-66.
16. Kunneman M, Stiggelbout AM, Marijnen CA, Pieterse AH. Probabilities of benefit and harms of preoperative radiotherapy for rectal cancer: What do radiation oncologists tell and what do patients understand? *Patient Educ Couns*. 2015;98(9):1092-8.

17. Kunneman M, Marijnen CA, Baas-Thijssen MC, van der Linden YM, Rozema T, Muller K, et al. Considering patient values and treatment preferences enhances patient involvement in rectal cancer treatment decision making. *Radiother Oncol.* 2015;117(2):338-42.
18. Pieterse AH, Kunneman M, Engelhardt EG, Brouwer NJ, Kroep JR, Marijnen CAM, et al. Oncologist, patient, and companion questions during pretreatment consultations about adjuvant cancer treatment: a shared decision-making perspective. *Psychooncology.* 2017;26(7):943-50.
19. Chong CA, Chen IJ, Naglie G, Krahn MD. How well do guidelines incorporate evidence on patient preferences? *J Gen Intern Med.* 2009;24(8):977-82.
20. McCormack JP, Loewen P. Adding "value" to clinical practice guidelines. *Can Fam Physician.* 2007;53(8):1326-7.
21. de Kort SJ, Burgers JS, Willems DL. Value judgements that matter to patients remain implicit in oncology guidelines: an observational study. *Neth J Med.* 2009;67(2):62-8.
22. Krahn M, Naglie G. The next step in guideline development: incorporating patient preferences. *JAMA.* 2008;300(4):436-8.
23. McCartney M, Treadwell J, Maskrey N, Lehman R. Making evidence based medicine work for individual patients. *BMJ.* 2016;353:i2452.
24. Montori VM, Brito JP, Murad MH. The optimal practice of evidence-based medicine: incorporating patient preferences in practice guidelines. *JAMA.* 2013;310(23):2503-4.
25. Shaneyfelt TM, Centor RM. Reassessment of clinical practice guidelines: go gently into that good night. *JAMA.* 2009;301(8):868-9.
26. Alonso-Coello P, Oxman AD, Moberg J, Brignardello-Petersen R, Akl EA, Davoli M, et al. GRADE Evidence to Decision (EtD) frameworks: a systematic and transparent approach to making well informed healthcare choices. 2: Clinical practice guidelines. *BMJ.* 2016;353:i2089.
27. Alonso-Coello P, Schunemann HJ, Moberg J, Brignardello-Petersen R, Akl EA, Davoli M, et al. GRADE Evidence to Decision (EtD) frameworks: a systematic and transparent approach to making well informed healthcare choices. 1: Introduction. *BMJ.* 2016;353:i2016.
28. Andrews J, Guyatt G, Oxman AD, Alderson P, Dahm P, Falck-Ytter Y, et al. GRADE guidelines: 14. Going from evidence to recommendations: the significance and presentation of recommendations. *J Clin Epidemiol.* 2013;66(7):719-25.
29. Andrews JC, Schunemann HJ, Oxman AD, Pottie K, Meerpohl JJ, Coello PA, et al. GRADE guidelines: 15. Going from evidence to recommendation-determinants of a recommendation's direction and strength. *J Clin Epidemiol.* 2013;66(7):726-35.
30. Stiggelbout AM, Van der Weijden T, De Wit MP, Frosch D, Legare F, Montori VM, et al. Shared decision making: really putting patients at the centre of healthcare. *BMJ.* 2012;344:e256.
31. Zhang Y, Coello PA, Brozek J, Wiercioch W, Etzeandia-Ikobaltzeta I, Akl EA, et al. Using patient values and preferences to inform the importance of health outcomes in practice guideline development following the GRADE approach. *Health Qual Life Outcomes.* 2017;15(1):52.
32. Gale NK, Heath G, Cameron E, Rashid S, Redwood S. Using the framework method for the analysis of qualitative data in multi-disciplinary health research. *BMC Med Res Methodol.* 2013;13:117.
33. Pope C, Ziebland S, Mays N. Qualitative research in health care. Analysing qualitative data. *BMJ.* 2000;320(7227):114-6.
34. Friese S. Atlas.ti 7 User manual. Berlin: Atlas.ti Scientific Software Development; 2012.
35. Alexander PE, Li SA, Gionfriddo MR, Stoltzfus RJ, Neumann I, Brito JP, et al. Senior GRADE methodologists encounter challenges as part of WHO guideline development panels: an inductive content analysis. *J Clin Epidemiol.* 2016;70:123-8.
36. Casarett D. The Science of Choosing Wisely--Overcoming the Therapeutic Illusion. *N Engl J Med.* 2016;374(13):1203-5.
37. Engelhardt EG, Pieterse AH, Han PK, van Duijn-Bakker N, Cluitmans F, Maartense E, et al. Disclosing the Uncertainty Associated with Prognostic Estimates in Breast Cancer. *Med Decis Making.* 2017;37(3):179-92.

- 1  
2  
3 38. Christie B. Catherine Calderwood: champion of "realistic medicine". BMJ. 2016;355:i5455.  
4 39. Ioannidis JPA. Hijacked evidence-based medicine: stay the course and throw the pirates  
5 overboard. J Clin Epidemiol. 2017;84:11-3.  
6 40. Coulter A. The global reach of shared decision making 2017 [Available from:  
7 [https://blogs.bmj.com/bmj/2017/07/13/angela-coulter-the-global-reach-of-shared-decision-](https://blogs.bmj.com/bmj/2017/07/13/angela-coulter-the-global-reach-of-shared-decision-making/)  
8 [making/](https://blogs.bmj.com/bmj/2017/07/13/angela-coulter-the-global-reach-of-shared-decision-making/).  
9  
10 41. van der Weijden T, Pieterse AH, Koelewijn-van Loon MS, Knaapen L, Legare F, Boivin A, et al.  
11 How can clinical practice guidelines be adapted to facilitate shared decision making? A qualitative  
12 key-informant study. BMJ Qual Saf. 2013;22(10):855-63.  
13 42. Alexander P.E. GMR, Li S.A., Bero L., Stoltzfus R.J., Neumann I., Brito J.P., Djulbegovic B.,  
14 Montori V.M., Norris S.L., Schünemann H.J., Thabane L., Guyatt G.H. A number of factors explain  
15 why WHO guideline developers make strong recommendations inconsistent with GRADE guidance. J  
16 Clin Epidemiol. 2016;70:111-22.  
17 43. Schunemann HJ, Wiercioch W, Brozek J, Etzeandia-Ikobaltzeta I, Mustafa RA, Manja V, et al.  
18 GRADE Evidence to Decision (EtD) frameworks for adoption, adaptation, and de novo development  
19 of trustworthy recommendations: GRADE-ADOLOPMENT. J Clin Epidemiol. 2017;81:101-10.  
20  
21  
22  
23  
24  
25  
26  
27  
28  
29  
30  
31  
32  
33  
34  
35  
36  
37  
38  
39  
40  
41  
42  
43  
44  
45  
46  
47  
48  
49  
50  
51  
52  
53  
54  
55  
56  
57  
58  
59  
60

## Standards for Reporting Qualitative Research (SRQR)\*

<http://www.equator-network.org/reporting-guidelines/srqr/>

Page/line no(s).

### Title and abstract

|                                                                                                                                                                                                                                                              |        |
|--------------------------------------------------------------------------------------------------------------------------------------------------------------------------------------------------------------------------------------------------------------|--------|
| <p><b>Title</b> - Concise description of the nature and topic of the study Identifying the study as qualitative or indicating the approach (e.g., ethnography, grounded theory) or data collection methods (e.g., interview, focus group) is recommended</p> | Page 1 |
| <p><b>Abstract</b> - Summary of key elements of the study using the abstract format of the intended publication; typically includes background, purpose, methods, results, and conclusions</p>                                                               | Page 2 |

### Introduction

|                                                                                                                                                                     |                     |
|---------------------------------------------------------------------------------------------------------------------------------------------------------------------|---------------------|
| <p><b>Problem formulation</b> - Description and significance of the problem/phenomenon studied; review of relevant theory and empirical work; problem statement</p> | Page 4              |
| <p><b>Purpose or research question</b> - Purpose of the study and specific objectives or questions</p>                                                              | Page 4, lines 39-43 |

### Methods

|                                                                                                                                                                                                                                                                                                                                                                                                             |                                                              |
|-------------------------------------------------------------------------------------------------------------------------------------------------------------------------------------------------------------------------------------------------------------------------------------------------------------------------------------------------------------------------------------------------------------|--------------------------------------------------------------|
| <p><b>Qualitative approach and research paradigm</b> - Qualitative approach (e.g., ethnography, grounded theory, case study, phenomenology, narrative research) and guiding theory if appropriate; identifying the research paradigm (e.g., postpositivist, constructivist/ interpretivist) is also recommended; rationale**</p>                                                                            | Page 4, lines 26-37<br>Page 5, lines 4-14<br>Page 7, line 27 |
| <p><b>Researcher characteristics and reflexivity</b> - Researchers' characteristics that may influence the research, including personal attributes, qualifications/experience, relationship with participants, assumptions, and/or presuppositions; potential or actual interaction between researchers' characteristics and the research questions, approach, methods, results, and/or transferability</p> | Page 6, lines 35-37                                          |
| <p><b>Context</b> - Setting/site and salient contextual factors; rationale**</p>                                                                                                                                                                                                                                                                                                                            | Page 5, lines 16-20                                          |
| <p><b>Sampling strategy</b> - How and why research participants, documents, or events were selected; criteria for deciding when no further sampling was necessary (e.g., sampling saturation); rationale**</p>                                                                                                                                                                                              | Page 5, lines 24-34<br>Page 7, lines 5-7                     |
| <p><b>Ethical issues pertaining to human subjects</b> - Documentation of approval by an appropriate ethics review board and participant consent, or explanation for lack thereof; other confidentiality and data security issues</p>                                                                                                                                                                        | Page 7, lines 8-10                                           |
| <p><b>Data collection methods</b> - Types of data collected; details of data collection procedures including (as appropriate) start and stop dates of data collection and analysis, iterative process, triangulation of sources/methods, and modification of procedures in response to evolving study findings; rationale**</p>                                                                             | Page 5, line 39 -<br>page 6, line 31<br>Page 7, lines 13-24  |

|                                                                                                                         |                                                                                                                                                                                                                                                       |                                                                 |
|-------------------------------------------------------------------------------------------------------------------------|-------------------------------------------------------------------------------------------------------------------------------------------------------------------------------------------------------------------------------------------------------|-----------------------------------------------------------------|
| 1<br>2<br>3<br>4<br>5<br>6<br>7<br>8<br>9<br>10<br>11<br>12<br>13<br>14<br>15<br>16<br>17<br>18<br>19<br>20<br>21<br>22 | <b>Data collection instruments and technologies</b> - Description of instruments (e.g., interview guides, questionnaires) and devices (e.g., audio recorders) used for data collection; if/how the instrument(s) changed over the course of the study | Page 5, lines 37;<br>Page 6. Lines 33-41<br>Page 7, lines 22-24 |
|                                                                                                                         | <b>Units of study</b> - Number and relevant characteristics of participants, documents, or events included in the study; level of participation (could be reported in results)                                                                        | Page 5, lines 24-25<br>Page 7, line 45-<br>page 8, line 4       |
|                                                                                                                         | <b>Data processing</b> - Methods for processing data prior to and during analysis, including transcription, data entry, data management and security, verification of data integrity, data coding, and anonymization/de-identification of excerpts    | Page 7, line 27-36                                              |
|                                                                                                                         | <b>Data analysis</b> - Process by which inferences, themes, etc., were identified and developed, including the researchers involved in data analysis; usually references a specific paradigm or approach; rationale**                                 | Page 6, line 41<br>Page 7, line 33-44                           |
|                                                                                                                         | <b>Techniques to enhance trustworthiness</b> - Techniques to enhance trustworthiness and credibility of data analysis (e.g., member checking, audit trail, triangulation); rationale**                                                                | Page 7, lines 13-17                                             |

### Results/findings

|                                                          |                                                                                                                                                                                                   |                                         |
|----------------------------------------------------------|---------------------------------------------------------------------------------------------------------------------------------------------------------------------------------------------------|-----------------------------------------|
| 23<br>24<br>25<br>26<br>27<br>28<br>29<br>30<br>31<br>32 | <b>Synthesis and interpretation</b> - Main findings (e.g., interpretations, inferences, and themes); might include development of a theory or model, or integration with prior research or theory | Pages 7, line 44-<br>page 11, line 18   |
|                                                          | <b>Links to empirical data</b> - Evidence (e.g., quotes, field notes, text excerpts, photographs) to substantiate analytic findings                                                               | Idem (including<br>Boxes and<br>Tables) |

### Discussion

|                                                                |                                                                                                                                                                                                                                                                                                                                                                                                             |                                       |
|----------------------------------------------------------------|-------------------------------------------------------------------------------------------------------------------------------------------------------------------------------------------------------------------------------------------------------------------------------------------------------------------------------------------------------------------------------------------------------------|---------------------------------------|
| 33<br>34<br>35<br>36<br>37<br>38<br>39<br>40<br>41<br>42<br>43 | <b>Integration with prior work, implications, transferability, and contribution(s) to the field</b> - Short summary of main findings; explanation of how findings and conclusions connect to, support, elaborate on, or challenge conclusions of earlier scholarship; discussion of scope of application/generalizability; identification of unique contribution(s) to scholarship in a discipline or field | Page 11, line 22<br>– page 13, line 6 |
|                                                                | <b>Limitations</b> - Trustworthiness and limitations of findings                                                                                                                                                                                                                                                                                                                                            | Page 12, lines<br>29-44               |

### Other

|                                        |                                                                                                                                               |                     |
|----------------------------------------|-----------------------------------------------------------------------------------------------------------------------------------------------|---------------------|
| 44<br>45<br>46<br>47<br>48<br>49<br>50 | <b>Conflicts of interest</b> - Potential sources of influence or perceived influence on study conduct and conclusions; how these were managed | Page 3, lines 12-14 |
|                                        | <b>Funding</b> - Sources of funding and other support; role of funders in data collection, interpretation, and reporting                      | Page 3, lines 8-11  |

\*The authors created the SRQR by searching the literature to identify guidelines, reporting standards, and critical appraisal criteria for qualitative research; reviewing the reference lists of retrieved sources; and contacting experts to gain feedback. The SRQR aims to improve the transparency of all aspects of qualitative research by providing clear standards for reporting qualitative research.



1  
2  
3 \*\*The rationale should briefly discuss the justification for choosing that theory, approach,  
4 method, or technique rather than other options available, the assumptions and limitations  
5 implicit in those choices, and how those choices influence study conclusions and  
6 transferability. As appropriate, the rationale for several items might be discussed together.  
7

8 **Reference:**

9 [O'Brien BC, Harris IB, Beckman TJ, Reed DA, Cook DA. Standards for reporting qualitative  
10 research: a synthesis of recommendations. \*Academic Medicine\*, Vol. 89, No. 9 / Sept 2014  
11 DOI: 10.1097/ACM.0000000000000388](#)  
12  
13  
14  
15  
16  
17  
18  
19  
20  
21  
22  
23  
24  
25  
26  
27  
28  
29  
30  
31  
32  
33  
34  
35  
36  
37  
38  
39  
40  
41  
42  
43  
44  
45  
46  
47  
48  
49  
50  
51  
52  
53  
54  
55  
56  
57  
58  
59  
60

For peer review only

# BMJ Open

## The role of patient preferences in clinical practice guidelines: a multiple methods study using guidelines from oncology as a case

|                                 |                                                                                                                                                                                                                                                                                                                                                                                                                                                                                                                                                                                                                                                                                                                                                                                                                                                                            |
|---------------------------------|----------------------------------------------------------------------------------------------------------------------------------------------------------------------------------------------------------------------------------------------------------------------------------------------------------------------------------------------------------------------------------------------------------------------------------------------------------------------------------------------------------------------------------------------------------------------------------------------------------------------------------------------------------------------------------------------------------------------------------------------------------------------------------------------------------------------------------------------------------------------------|
| Journal:                        | <i>BMJ Open</i>                                                                                                                                                                                                                                                                                                                                                                                                                                                                                                                                                                                                                                                                                                                                                                                                                                                            |
| Manuscript ID                   | bmjopen-2019-032483.R2                                                                                                                                                                                                                                                                                                                                                                                                                                                                                                                                                                                                                                                                                                                                                                                                                                                     |
| Article Type:                   | Original research                                                                                                                                                                                                                                                                                                                                                                                                                                                                                                                                                                                                                                                                                                                                                                                                                                                          |
| Date Submitted by the Author:   | 05-Nov-2019                                                                                                                                                                                                                                                                                                                                                                                                                                                                                                                                                                                                                                                                                                                                                                                                                                                                |
| Complete List of Authors:       | Gärtner , Fania; Leiden University Medical Center<br>Portielje, Johanneke; Leiden University Medical Center, Clinical Oncology<br>Langendam, Miranda; Academic Medical Center, Clinical Epidemiology, Biostatistics and Bioinformatics<br>Hairwassers, Desiree; Breast Cancer Association the Netherlands<br>Agoritsas, Thomas; University Hospitals of Geneva, Division of General Internal Medicine & Division of Clinical Epidemiology; McMaster University Faculty of Health Sciences, Department of Health Research Methods, Evidence, and Impact<br>Gijssen, Brigitte; Netherlands Comprehensive Cancer Organisation<br>Liefers, Gerrit-Jan; Leids Universitair Medisch Centrum, Surgery; Leids Universitair Medisch Centrum,<br>Pieterse, A.H. ; Leids Universitair Medisch Centrum, Medical Decision Making<br>Stiggelbout, Anne; Leiden University Medical Center |
| <b>Primary Subject Heading</b>: | Health services research                                                                                                                                                                                                                                                                                                                                                                                                                                                                                                                                                                                                                                                                                                                                                                                                                                                   |
| Secondary Subject Heading:      | Communication, Ethics, Evidence based practice, Oncology, Qualitative research                                                                                                                                                                                                                                                                                                                                                                                                                                                                                                                                                                                                                                                                                                                                                                                             |
| Keywords:                       | Protocols & guidelines < HEALTH SERVICES ADMINISTRATION & MANAGEMENT, shared decision making, evidence-based medicine, GRADE, patient preferences, choice awareness                                                                                                                                                                                                                                                                                                                                                                                                                                                                                                                                                                                                                                                                                                        |
|                                 |                                                                                                                                                                                                                                                                                                                                                                                                                                                                                                                                                                                                                                                                                                                                                                                                                                                                            |

SCHOLARONE™  
Manuscripts

# The role of patient preferences in clinical practice guidelines: a multiple methods study using guidelines from oncology as a case

F Gärtner (1) (<https://orcid.org/0000-0002-0351-0204>), J Portielje (2) (<https://orcid.org/0000-0002-5169-6306>), M Langendam (3) (<https://orcid.org/0000-0001-9038-3209>), D Hairwassers (4), T Agoritsas (5,6) (<https://orcid.org/0000-0002-6182-9969>), B Gijzen (7) (<https://orcid.org/0000-0003-4578-0293>), GJ Liefers (8) (<https://orcid.org/0000-0001-7326-8313>), AH Pieterse (1) (<https://orcid.org/0000-0001-6395-0052>), AM Stiggelbout (1) (<https://orcid.org/0000-0002-6293-4509>)

1. Medical Decision Making, Department of Biomedical Data Sciences, Leiden University Medical Center, Leiden, The Netherlands
2. Department of Clinical Oncology, Leiden University Medical Center, Leiden, The Netherlands
3. Department of Clinical Epidemiology, Biostatistics and Bioinformatics, Amsterdam UMC, Amsterdam, The Netherlands
4. Breast Cancer Association The Netherlands (Borstkankervereniging Nederland), The Netherlands
5. Division General Internal Medicine, University Hospitals of Geneva, Geneva, Switzerland
6. Department of Health Research Methods, Evidence, and Impact, McMaster University, Hamilton, L8S 4K1, Canada
7. The Netherlands Comprehensive Cancer Organisation (IKNL), Maastricht/Utrecht, The Netherlands
8. Department of Surgery, Leiden University Medical Center, Leiden, The Netherlands

**Word count:** 4797

**Keywords:** EBM, Clinical Practice Guidelines, Shared Decision Making, patient preferences, patient-centred care, choice awareness

**Corresponding author:**

AM Stiggelbout, A.M.Stiggelbout@lumc.nl

1  
2  
3 **1 ABSTRACT (299 words)**

4 *2 Objectives:* Many treatment decisions are preference-sensitive, and call for shared decision-making,  
5 3 notably when benefits are limited or uncertain, and harms impact quality of life. We explored if  
6 4 clinical practice guidelines (CPGs) acknowledge preference-sensitive decisions in how they motivate  
7 5 and phrase their recommendations.

8 6 *Design:* We performed a qualitative analysis of the content of CPGs , and verified the results in semi-  
9 7 structured interviews with CPG panel members.

10 8 *Setting:* Dutch oncology CPGs issued in 2010 or later, concerning primary treatment with curative  
11 9 intent.

12 10 *Participants:* 14 CPG panel members.

13 11 *Main outcomes:* For treatment recommendations from six CPG modules, two researchers extracted:  
14 12 strength of recommendation in terms of GRADE and its consistency with the CPG text; completeness  
15 13 of presentation of benefits and harms; incorporation of patient preferences; statements on the  
16 14 panel's benefits-harm tradeoff underlying recommendation; advice on patient involvement in  
17 15 decision-making.

18 16 *Results:* We identified 32 recommendations, 18 were acknowledged preference-sensitive decisions.  
19 17 Three of 14 strong recommendations should have been weak based on the module text. The  
20 18 reporting of benefits and harms, and their probabilities, was sufficiently complete and clear to  
21 19 inform the strength of the recommendation in one of the six modules only. Numerical probabilities  
22 20 were seldom presented. None of the modules presented information on patient preferences. CPG  
23 21 panel's preferences were not made explicit, but appeared to have impacted 15 of 32  
24 22 recommendations. Advice to involve patients and their preferences in decision-making was given for  
25 23 20 recommendations (14 weak). Interviewees confirmed these findings. Explanations for lack of  
26 24 information were e.g. that clinicians know the information and that CPGs must be short.  
27 25 Explanations for trade-offs made were cultural-historical preferences, compliance with daily care,  
28 26 presumed role of CPGs, and lack of time.

29 27 *Conclusions:* The motivation and phrasing of CPG recommendations do not stimulate choice  
30 28 awareness and a neutral presentation of options, thus hindering shared decision making.  
31 29  
32 30  
33 31  
34 32  
35 33  
36 34  
37 35  
38  
39  
40  
41  
42  
43  
44  
45  
46  
47  
48  
49  
50  
51  
52  
53  
54  
55  
56  
57  
58  
59  
60

1  
2  
3 1 SUMMARY BOX  
4

5 2 Strengths and limitations of this study  
6

- 7  
8 3 • Strength of the study is that we used GRADE for the qualitative analysis of the guidelines, as  
9 4 weak recommendations in GRADE reflect preference-sensitive decisions.  
10 5 • Strength of the study is the validation of the qualitative analysis of the guidelines in in-depth  
11 6 interviews with the guideline developers.  
12 7 • Limitation of the study is that we studied oncology guidelines from one country only .  
13 8

14  
15  
16 9 FUNDING  
17

18  
19 10 This work was supported by the Dutch Cancer Society grant number UL 2015-7615. The funding  
20 11 agreement ensured the authors' independence in designing the study, interpreting the data, writing,  
21 12 and publishing the report.  
22

23 13 COMPETING INTERESTS  
24

25  
26 14 TA and ML are active members of the GRADE working group. BG is employed at The Netherlands  
27 15 Comprehensive Cancer Organisation (IKNL), the organization responsible for development of the  
28 16 CPGs that were analyzed. e data, writing, and publishing the report.  
29

30 17 DATA SHARING  
31

32  
33 18 Anonymized transcripts of the interviews and extraction forms (in Dutch) may be shared upon  
34 19 reasonable request to the corresponding author.  
35

36 20  
37  
38  
39  
40  
41  
42  
43  
44  
45  
46  
47  
48  
49  
50  
51  
52  
53  
54  
55  
56  
57  
58  
59  
60

## 1. INTRODUCTION

Many decisions in healthcare are preference-sensitive, in particular when treatments are burdensome, benefits are limited or uncertain, and harms may impact quality of life.<sup>(1)</sup> Examples are decisions about adjuvant treatment in oncology (2-4) or about hip or knee arthroplasty for osteoarthritis.<sup>(5-7)</sup> Research shows that patients as well as clinicians often vary considerably in their evaluation of the balance of benefits and harms. Further, clinicians are not always able to predict their individual patients' preferences for treatments or outcomes of treatment.<sup>(8, 9)</sup> Shared decision making (SDM) is therefore advocated particularly in preference-sensitive decisions, but is not yet common practice.<sup>(10, 11)</sup> Clinicians are not prone to fostering choice awareness in their patients,<sup>(12, 13)</sup> often present treatment options in unbalanced ways, e.g., by overestimating benefits and minimizing harms,<sup>(14)</sup> or steer in other ways, consciously or unconsciously.<sup>(15)</sup> Further, numerical probabilities needed to make a trade-off are seldom discussed,<sup>(16)</sup> and patient preferences infrequently elicited.<sup>(17, 18)</sup> This raises the question if clinicians perceive these decisions as preference-sensitive? Clinical practice guidelines (CPGs) could play a role in this perception, given the impact they have on what treatment options clinicians present to their patients. While CPGs may use wording that suggests that a decision is preference-sensitive, such as "we suggest" or "clinicians might", rather than "we recommend" or "clinicians should", clinicians may still not fully appreciate the importance of offering more than one option to their patients.

It is unknown if recommendations in current CPGs identify preference-sensitive decisions and demand a role for patient preferences in decision making. Two older studies showed that the relevance of preferences of individual patients was not acknowledged in many CPGs.<sup>(19, 20)</sup> CPG developers often assume "generally accepted" values in developing recommendations, but do not acknowledge this in the phrasing of the recommendation.<sup>(21)</sup> A request for a more systematic incorporation of patient preferences in CPGs has been expressed repeatedly in high impact journals since the publications of these studies.<sup>(22-25)</sup> The Grading of Recommendations Assessment, Development, and Evaluation (GRADE) working group –whose approach is nowadays considered the standard in CPG development– has published a framework that acknowledges the integration of patients' values and preferences in the development of CPG recommendations.<sup>(26-31)</sup> In the GRADE approach, preference-sensitive decisions are reflected in so-called "weak", or "conditional" recommendations. These arise when benefits and harms are closely balanced, evidence is lacking or of uncertain quality, when patients' preferences are expected to vary substantially, but also when no evidence on patient preferences is available, even with moderate or strong evidence of high quality on the benefits of an option.<sup>(28)</sup> In such situations, GRADE still leads to weak recommendations, assuming that most informed patients would choose the recommended treatment, but a substantial number would not<sup>(28, 29, 31)</sup> (see Box 1 for a summary of the role that GRADE proposes for patient values and preferences in CPG development).

1  
2  
3 **1 Box 1: The GRADE approach and GRADE's proposed role of patient values and preferences in CPG**  
4 **2 recommendation development**  
5  
6 **3**  
7  
8

9 GRADE offers an approach to rate the certainty in the evidence and strength of recommendations, in  
10 which *strong* and *weak* (also known as *conditional*) recommendations are distinguished. Consideration  
11 of patient preferences is a crucial step in deciding on the strength of the recommendation. According to  
12 the GRADE approach, first, the best estimates of effect for the interventions and the certainty in this  
13 evidence (quality of the evidence) is assessed, using up-to-date systematic reviews. Further, the CPG  
14 panel should consider a number of criteria that influence the strength of recommendations, such as  
15 variability or uncertainty in how patients value the main outcomes (both benefits and harms), the  
16 balance between benefits and harms, and considerations of resource use, health equity, feasibility and  
17 acceptability (from both stakeholder and patient perspective) of an intervention.(26-30) Based on an  
18 overall assessment across these criteria, CPG panels reach a conclusion about the direction of their  
19 recommendation (for or against the intervention) and the strength of their recommendation: strong or  
20 weak.(26) A high level of certainty across the criteria (such as high quality evidence, clear balance  
21 between benefits and harms, no uncertainty in patient preferences) allows for strong  
22 recommendations. A high level of uncertainty, i.e., preference-sensitive decisions, leads to weak  
23 recommendations: there is more than one single best option available, there is important uncertainty  
24 or variability in patient preferences, or the benefits and harms are closely balanced. Tension has been  
25 shown to occur between adherence to GRADE and the wish to make a strong recommendation out of  
26 conviction that a treatment is beneficial, despite the evidence quality or certainty being (very) low.(32)  
27  
28  
29  
30  
31

32  
33 To guarantee the acknowledgement of patient preferences in the development of recommendations,  
34 the GRADE strategy asks to clearly present i) how substantial benefits and harms are, what their  
35 balance is, and what the overall certainty of the evidence on these outcomes is, and ii) if there is  
36 uncertainty about or variability in how much patients value the important outcomes.(26, 27, 33) In  
37 other papers GRADE recommends guideline developers to make transparent and explicit statements iii)  
38 about the (variability in) patient values and preferences, as well as CPG panel assumptions of these  
39 values and preferences on which decisions on the strength of recommendations are based, in order to  
40 be able to judge the applicability of recommendations for decision making with the individual  
41 patient.(28, 29)  
42  
43  
44  
45  
46

47 **4** Therefore, a key ingredient for the identification of preference-sensitive decisions is the  
48 **5** acknowledgment of values and preferences in the rationale for CPG recommendations. The aim of  
49 **6** our study was therefore to explore to what extent CPGs acknowledge preference-sensitive decisions  
50 **7** in the way they support and phrase their recommendations. We further wished to assess if the CPGs  
51 **8** facilitate the communication of the preference-sensitive nature of these decisions to patients.  
52  
53  
54  
55  
56  
57  
58  
59  
60

## 2. METHODS

We performed a qualitative analysis of Dutch oncologic CPGs, which we next verified and refined in semi-structured interviews with members of CPG development panels.

### 2.1 Qualitative analysis of CPGs

#### 2.1.1 Selected CPG modules

We used Dutch oncologic CPGs as a case, because oncology is strongly guideline-driven, decisions are often preference-sensitive, the guideline development process is organized nationally, and the CPGs are open access. The Netherlands Comprehensive Cancer Organisation (IKNL) develops guidelines “under responsibility of the most relevant professional or scientific society, usually following evidence-based methodology” ([www.oncoline.nl](http://www.oncoline.nl)). We selected three tumour-specific CPGs, and of each we selected all content of two modules to include in our analysis (i.e., the sections of the CPGs that address specific treatments or patient groups). We selected a convenience sample of modules for prevalent cancers that we expected to contain at least one preference-sensitive decision, calling for a weak recommendation. This expectation was based on earlier research from our group (e.g., (11, 13, 15)), views from the oncology experts on our research team, and/or on the availability of literature on SDM and decision aids for the treatment in that module. Each of the modules included more than one recommendation.

Further criteria for selection of the CPGs and the modules were: published on [www.oncoline.nl](http://www.oncoline.nl), issued in 2010 or later, and concerning primary treatment with curative intent. Table 1 presents the CPGs and modules we selected. For the breast cancer CPG, our contact person at the IKNL provided us confidentially with the most recent revision of the two selected modules, which were not yet published at the time of our analysis. In none of the modules explicit reference was made to GRADE.

#### 2.1.2 Data extraction and analysis

We assessed if the CPG acknowledges preference-sensitive decisions, and whether the user is to understand the strength of a recommendation, based on the information presented. To this aim we developed a coding scheme that consisted of the five following themes, based on the GRADE framework ((28)).

**1. Strength of recommendations:** First, we scored the strength of the recommendation (*strongly in favour/ weakly in favour/ neutral / weakly against/ strongly against* a specific option) for each treatment option described in the Recommendation section of the CPG. Scoring was solely based on the phrasing used in that section.. The categories strong and weak that we used are in line with GRADE. We added the ‘neutral’ category if a weak recommendation for more than one option was given.

Next, we assessed whether this strength of recommendation was supported by information elsewhere in the guideline, including information about the certainty of the evidence, the balance between benefits and harms and their probabilities, the variability or uncertainty in how patients value the benefits and harms, or the absence of evidence on patient preferences, even with moderate or strong evidence of high quality on the benefits of an option. If other criteria were



1 provided, we coded these as well. We extracted all information that indicated a discrepancy with the  
2 strength of recommendation, and scored whether or not textual discrepancies were identified  
3 (*yes/no*). We based this on the CPG text, and did not resort to the supporting literature.

4  
5 2. Balance of benefits and harms (trade-offs): We defined a *trade-off* as a statement presenting the  
6 balance of benefits and harms in the treatment decision, ideally based on the probability of benefits  
7 and harms, the quality of the evidence, and on how much patients value the outcomes. We  
8 extracted statements about the trade-offs made in the CPG or about the trade-offs to be made in  
9 the clinical encounter with the individual patient (*trade-offs made explicit/trade-offs not made*  
10 *explicit*). We also judged whether the presentation of outcomes was sufficiently complete and clear  
11 to inform the trade-off (*sufficient/insufficient*).

12  
13 3. Patient preferences: We assessed if patient preferences had been incorporated (*yes/no*), and if so,  
14 how (*literature search/data collection by CPG panel/other*). Also, we extracted whether explicit  
15 assumptions were made regarding patient preferences (*yes/no*).

16  
17 4. CPG panel's values and preferences: We extracted information about the preferences that  
18 supported the CPG panel's weighing of benefits and harms, and summarized per treatment  
19 recommendation if these preferences were explicitly mentioned (*yes/no*). This theme does not  
20 directly originate from the GRADE recommendations. We added it as we encountered statements  
21 suggesting that CPG panel's values and preferences had influenced the development of  
22 recommendations. Finally, we assessed if the CPGs facilitated discussion of patient preferences for  
23 weak recommendations, as for the latter "clinicians and other health care providers need to devote  
24 more time to the process of shared decision making by which they ensure that the informed choice  
25 reflects individual values".((28))

26  
27 5. Advice on how to involve the patient: We extracted statements that described how to involve an  
28 individual patient or his/her preferences in the decision making process, and summarized per  
29 recommendation if such statement was given (*yes, actively involving the patient or patient*  
30 *preferences in the decision making/yes, informing the patient/no advice about patient involvement*).

31  
32 Two coders (FG and AS) independently applied a first draft of the coding scheme to a CPG module  
33 that would not be included in the final selection. They subsequently discussed the coding process  
34 and any inconsistencies, and updated the coding scheme. They had not been involved in the  
35 development of any CPG in oncology nor GRADE, and had no existing working relationship with the  
36 members of the respective CPG panels. The coders independently applied the coding scheme to one  
37 of the selected modules, and resolved any discrepancies by consensus. Based on this discussion no  
38 further changes were made to the scheme. One researcher (FG) then coded the remaining modules,  
39 and the second checked the extraction and scoring. They discussed any inconsistency between them  
40 until agreement was reached. Data extracted was analysed descriptively.

## 41 42 43 **2.2 Semi-structured interviews with CPG developers**

### 44 2.2.1 Sampling

1 We or our IKNL contact person invited all panel members involved in the development of the  
2 selected modules for participation. Membership and size of the different CPG panels varied, not all  
3 were multidisciplinary, and not all included a patient representative. We aimed to interview at least  
4 one member of each specialty involved in the development of a module, the patient representative,  
5 and the IKNL supervisor of the CPG.. As patient representatives did not participate in this study  
6 based on a paid position, the respective patient organizations received an incentive of 100 Euros.  
7 The study protocol did not require review from a medical ethics committee as no patients or lay  
8 people were recruited.

### 9 10 2.2.2 Data collection

11 In semi-structured interviews, we first checked whether the interviewee agreed with our  
12 interpretation of the strength of recommendations, our extraction of the discrepancies found in the  
13 CPG text, of the trade-offs, and the completeness and clarity of the presentation of the benefits and  
14 harms, of the role of patient preferences, and of the preferences of the CPG panels that supported  
15 the recommendations. For the benefits, harms, and trade-offs we asked them how the developers  
16 selected which ones to present, and whether the presentation of benefits and harms aimed to  
17 facilitate communication in the clinical encounter. Finally, we discussed the function of statements  
18 concerning the involvement of patients and their preferences in decision making for the individual  
19 patient.

20 We adapted the questions to the specific content of the module to be discussed. For each  
21 subsequent interview we added or adapted questions based on earlier interviews. Interviews lasted  
22 30 to 60 minutes, were audiotaped, and transcribed verbatim. One interviewer (FG) trained in  
23 qualitative research methods and highly experienced in interviewing carried out all interviews.

### 24 25 2.2.3 Coding and analysis

26 We adhered to the Framework Approach to code and analyse the interviews.(34, 35) The coding  
27 scheme was based on the five themes of the CPG analysis described above. First, two researchers  
28 (FG and AS) independently familiarized themselves with the data, and coded three interviews  
29 deductively, to supplement our coding scheme with any additional emerging themes. Dissimilarities  
30 in coding were discussed and codes were adapted based on consensus. Second, one researcher  
31 applied deductive coding to all other interviews and refined, and reduced the codes in a process of  
32 re-reading and constant comparison of codes. Third, categories of codes were clustered to generate  
33 (sub)themes. Steps two and three were performed by one researcher and checked by the second.  
34 Inconsistencies in interpretation of the data and formulation of codes and themes were discussed  
35 until consensus was reached. Coding was performed using Atlas.ti software.(36)

## 36 37 **2.3 Patient involvement**

38 The CPG committee involved patient representatives for two modules, and we interviewed these  
39 patients. One patient (DH) took part in the writing of the manuscript. The article will be shared with  
40 the Netherlands Federation of Cancer Patient Societies NFK.

## 41 42 **3. RESULTS**

43 We present the results of the qualitative analysis and the interviews together, structured around the  
44 five themes mentioned above. We interviewed 14 CPG panel members: 10 clinicians, two patient  
45 representatives, and two IKNL supervisors (Table 1). For one module (adjuvant endocrine therapy in

breast cancer), only one of the clinician panel members indicated to have time to participate. After an interruption due to a clinical urgency she did not want to resume the interview because she found the questions too critical. Therefore only the IKNL supervisor and the patient panel member were interviewed. Patients were not part of the CPG panel for the NSCLC modules. To illustrate our analyses we add examples of the extractions of the CPG modules in Box 2-5.

### 3.1 Strength of CPG recommendations

In the six modules we identified 32 recommendations, of which 14 were phrased as strong and 18 as weak or neutral. The proportion of weak or neutral recommendations was just over half for all modules, except for that on adjuvant chemotherapy for colorectal carcinoma, which had fewer weak recommendations (33%). For five of the recommendations, both strong (three) and weak (one) or neutral (one), we found discrepancies between the strength of recommendation and extracted sentences from the module text. Box 2 shows examples of such discrepancies. In two of the strong recommendations, the discrepancy concerned evidence that was limited or of (very) low quality.

#### Box 2. Examples of textual discrepancies between strength of recommendation and statements in other parts of the CPG module

**1. Strongly phrased recommendation for adjuvant radiotherapy after lumpectomy in DCIS patients, combined with a statement about the relevance of patient involvement in the decision:**  
Recommendation

*"After complete excision of DCIS, radiotherapy of the whole chest wall (with or without boost) is recommended."* (Section: Recommendations, module 1)

Statement about patient involvement

*"Individual risk assessment and good deliberation with the informed patient determine whether radiotherapy is applied, with or without boost."* (Section: Recommendations, module 1)

**2. Strongly-phrased recommendation for adjuvant chemotherapy for patients with an MSI colon carcinoma, combined with a statement about very low-quality evidence.**

Recommendation

*"It is recommended that patients with an MSI carcinoma are offered only fluoropyrimidine-oxaliplatin-based chemotherapy."* (Section: Recommendations, module 4)

Statement about the evidence

*"The limited evidence concerning the value of oxaliplatin-based chemotherapy in this group shows no difference compared to patients with MSS tumours, so for patients with stage III MSI tumours, oxaliplatin-based chemotherapy remains recommended for now."* (Section: Literature review, module 4)

The CPG panel members confirmed our interpretation of the strength of recommendations. They explained that the three strong recommendations in the case of limited evidence were based on a valuation of the outcomes by the CPG panel (see further under 3.4). One explanation for the discrepancies between the strength of recommendation and the extracted were the differences in the handling of low quality evidence between methodologists and clinicians. One clinician described

1  
2  
3 1 methodologists as being more careful in drawing conclusions, while clinicians incorporate current  
4 2 standards of practice in the formulation of recommendations.  
5  
6 3

7 4 **Panel member:** *I think that it is inherent to making recommendations, where*  
8 5 *clinicians and methodologists clash. I am currently preparing the revision of the*  
9 6 *guideline, and what one sees is that we simply clash immediately with the*  
10 7 *methodologists in the preparation of the revision. Those are very dogmatic in their*  
11 8 *methodologic thinking. And the problem is, that that does not work, particularly not*  
12 9 *for the medical literature, so to say. And that is why the GRADE methodology*  
13 10 *explicitly discusses that in their approach, that one can upgrade the recommendation*  
14 11 *if one agrees as professional group that something should or should not be done.*  
15 12 (Interview 10 ,about T1 carcinoma in polyp)  
16 12  
17 13

### 18 14 **3.2 Information supporting the balance of benefits and harms**

19 15 Three of the modules (T1 carcinoma in polyp and adjuvant chemotherapy in colorectal cancer,  
20 16 stereotactic radiotherapy in NSCLC) included explicit trade-off statements (see Box 3). Probabilities  
21 17 of outcomes were mentioned in one of these, but for the benefits only. One trade-off statement  
22 18 substantiating a strong recommendation included the presentation of a value judgment, but it was  
23 19 unclear whose values it presented “*it is agreed upon that it is safe ...*,” and “*the risk of radiation*  
24 20 *pneumonitis seems acceptable*”.

25 21 For one of the six modules, adjuvant chemotherapy for colorectal cancer, we rated the report of  
26 22 benefits and harms and their probabilities as sufficiently complete and clear to inform the strength  
27 23 of recommendation. In three modules information was lacking about benefits, in four about harms,  
28 24 and harms were often only presented generically (e.g., “complications”, “psychological impact”).  
29 25 Relative rather than absolute risk reduction was often presented, verbal labels rather than numbers  
30 26 were used to convey risk, e.g., “*The chance of eventually preserving the breast is higher if radiation*  
31 27 *of the breast already takes place after the first excision*”.  
32  
33  
34  
35  
36  
37  
38  
39  
40  
41  
42  
43  
44  
45  
46  
47  
48  
49  
50  
51  
52  
53  
54  
55  
56  
57  
58  
59  
60

1  
2  
3 1 **Box 3: Extracted trade-off statements**  
4  
5

6 **Trade-off statement for a strong recommendation:**

- 7 • *It is generally agreed upon that a dose of 45–60 Gy in 3 fractions is safe and can achieve*  
8 *good (> 80%) local tumour control. The risk of radiation pneumonitis appears to be*  
9 *acceptable. However, long-term data on the late toxicity of SBRT is lacking, especially for T2*  
10 *tumours. Evidence pertaining to quality of life is likewise sparse. (Conclusions, module 3a)*  
11

12 **Trade-off statements for weak recommendations:**

- 13 • *Additional surgical resection after endoscopic removal of a malignant polyp should always*  
14 *be a balanced decision because of the relative high number needed to treat, for which the*  
15 *patient should always be fully informed about the potential oncologic benefit on the one*  
16 *hand and the risk of complications on the other (Recommendations, module 2a, used for*  
17 *weak recommendations)*  
18  
19 • *In various case-series, the incidence of local lymph node metastases in T1 colorectal*  
20 *carcinoma varies from 8 to 14 %.<sup>654 1082 1259</sup> There is also a large chance that surgical*  
21 *(segmental) resection of the colon has no therapeutic benefits, while being associated with*  
22 *morbidity and even mortality. Hence, it is important to make a well-considered choice for*  
23 *the treatment of malignant polyps.” (Section: Literature review, module 2a)*  
24  
25 • *For high risk malignant colon polyps the oncologic benefit of additional resection should be*  
26 *balanced against the risk of morbidity and possibly even mortality. In this trade-off the age,*  
27 *tumor location, comorbidity of the patient, and the preference of the patient should be*  
28 *taken into account. All patients should be discussed in the multidisciplinary team. (Section:*  
29 *Considerations, module 2a, used for weak recommendations)*  
30  
31 • *A retrospective subgroup analysis of the MOSAIC studying patients with Stage II colon*  
32 *carcinoma has shown that adding oxaliplatin to a fluoropyrimidine does not convey*  
33 *significant gain in dFS and OS. It seems useful to educate patients with high risk Stage II*  
34 *colon carcinoma about the possible advantages of adjuvant chemotherapy and the*  
35 *concomitant side effects. (Section: literature review, module 2b, used for weak*  
36 *recommendation) ]*  
37  
38 • *Treatment of centrally-located tumours is still under debate, given its high toxicity*  
39 *(Conclusions, module 3a, used for weak recommendation)*  
40  
41

42 2  
43  
44  
45  
46  
47  
48  
49  
50  
51  
52  
53  
54  
55  
56  
57  
58  
59  
60

1  
2  
3 1 Some interviewees found that transparency about the trade-offs in the CPG text could be improved,  
4 2 while others found an explicit mention, including details about benefits and harms and their  
5 3 probabilities, unnecessary. Reasons for the latter were time constraints, the aim to keep the CPG  
6 4 short, the assumption that CPG-users know the balance of benefits and harms, or that the weighting  
7 5 of benefits and harms was acceptable to everyone. One interviewee, e.g., stated that not  
8 6 recommending endocrine treatment in DCIS was “common knowledge” and that “*we also could*  
9 7 *have chosen to just leave out the whole paragraph about this adjuvant therapy, to just not mention it*  
10 8 *at all.*” (Interview 15)  
11  
12  
13  
14

15 10 The interviewees indicated that in none of the modules patients had been involved in the selection  
16 11 of the outcomes described. Some acknowledged that outcomes might be missing, but a substantial  
17 12 number did not regard a complete presentation of outcomes and their probabilities as necessary,  
18 13 using the following arguments: guidelines should be short, harms are assumed to be common  
19 14 knowledge for clinicians or might be presented in other modules, evidence for long-term harms is  
20 15 lacking, and probabilities from the literature are not applicable to the Dutch setting or would only be  
21 16 representative at the hospital level, not at that of the individual clinician (i.e., for mortality due to  
22 17 surgery). Several interviewees were especially reticent to present probabilities in terms of absolute  
23 18 risk reduction, as those percentages would soon be dated, differed between patient groups, or  
24 19 would be too time-consuming to calculate. One stated to have argued to include Numbers Needed  
25 20 to Treat in the CPG, to no avail.  
26  
27  
28  
29

30 22 **Interviewer:** *and for what reason is the other side of the coin not mentioned in the CPG?*  
31 23 *You indicated, already, that actually...*

32 24 **Panel-member:** *the CPG is mostly written to, what we provide as recommendation*  
33 25 *towards the patient, for the outcome of treatment. I don't know if the CPG is written at*  
34 26 *least, I have never interpreted it as such, but I don't know if one should put in the CPG,*  
35 27 *let's say, what's it called, all risks of treatment. That differs per agent, have different*  
36 28 *risks. And then the CPG becomes much more extensive. But that is also the baseline*  
37 29 *knowledge that every oncologist should have.*

38 30 (Interview 7, about adjuvant chemotherapy for colon carcinoma)  
39  
40  
41

### 3.3 Patient preferences

42 32  
43 33 None of the modules stated that evidence about patient preferences had been searched for or  
44 34 elicited. No information was presented about generic patient preferences, or about variation in  
45 35 patient preferences, either from the literature or assumed by the panel.  
46 36

47 37  
48 38 Some interviewees acknowledged that patient preferences may vary and may differ from clinician  
49 39 preferences, and they stressed that the awareness of such variation sometimes motivated a weak  
50 40 recommendation. Reasons not to include information about patient preferences were: time and  
51 41 capacity constraints, the assumption that no evidence exists, or lack of awareness that this  
52 42 information is to be included. Others were reluctant to include information about preference  
53 43 variation, because it could threaten the relationship between specialties (if this information would  
54 44 lead to patients choosing against the generally accepted treatment modality). Numerous  
55 45 assumptions about patient preferences were voiced, such as that patients prefer lumpectomy to  
56 46 mastectomy, length of life to quality of life, and active treatment to refraining from treatment.  
57  
58  
59  
46 Interviewees also stressed that if patients have a strong preference, they will express it anyway.

1  
2  
3 1  
4 2 **3.4 CPG panels' values and preferences**  
5 3 None of the modules explicitly labelled statements as presenting the CPG panel's values and  
6 4 preferences that underlie their weighing of the benefits and harms. We found implicit reference to  
7 5 CPG panels' preferences, having influenced the development of the recommendation in 15/32  
8 6 recommendations (see Box 4). These preferences concerned 9/14 strong recommendations and  
9 7 6/18 weak recommendations (see Table 2).  
10 8  
11 9

12  
13  
14  
15 **Box 4: Examples of CPG panels' values or preferences reflected in the CPG modules**

| CPG statement on which the interpretation of the panel's preference is based.                                                                                                                                                                                                                | Description of the identified CPG panel's preference                                                                                                                                                                                                                                                                                                                                                                                                                                                                                                                                                                                                  | Concerning what type of recommendation |
|----------------------------------------------------------------------------------------------------------------------------------------------------------------------------------------------------------------------------------------------------------------------------------------------|-------------------------------------------------------------------------------------------------------------------------------------------------------------------------------------------------------------------------------------------------------------------------------------------------------------------------------------------------------------------------------------------------------------------------------------------------------------------------------------------------------------------------------------------------------------------------------------------------------------------------------------------------------|----------------------------------------|
| <i>If breast-conserving surgery is not feasible or desirable, there is an indication for mastectomy. (Section: Literature review, module 1)</i>                                                                                                                                              | The panel appears to prefer breast-sparing surgery to mastectomy; mastectomy is considered only when breast-sparing surgery is not feasible or desirable.                                                                                                                                                                                                                                                                                                                                                                                                                                                                                             | 2 weak                                 |
| <i>DCIS is often discovered based on calcifications on the mammogram that, when biopsied, turn out to be associated with this DCIS. DCIS does not metastasize, and patients with DCIS hence have an excellent prognosis with adequate local treatment. (Section: Introduction, module 1)</i> | The panel prefers local treatment and therefore has a more positive attitude about radiotherapy and a less positive attitude about endocrine therapy for DCIS from the outset. (Supplemental note: no survival benefit has been demonstrated for either radiotherapy or endocrine therapy. It is, however, suspected that a subgroup of the radiotherapy group does indeed have improved survival. Radiotherapy also has an effect on the risk reduction of an invasive recurrence, which appears to be more limited with endocrine therapy. This could be a reason for the more positive attitude toward radiotherapy compared to endocrine therapy) | 1 strong                               |
| <i>The risk of radiation pneumonitis seems to be acceptable (Section: Conclusions, module 5)</i>                                                                                                                                                                                             | The panel finds the risk of radiation pneumonitis acceptable. In the literature, this risk is only represented in chance words: the risk is "very low" and "generally low". The reader is shown neither the absolute risk or patient preferences relevant to this trade-off.                                                                                                                                                                                                                                                                                                                                                                          | 1 strong and 1 weak                    |
| <i>Radiotherapy hence appears to be effective, considering that without adjuvant radiotherapy the risk of recurrence is expected to be higher and the chance of cure to be lower. (Section: Literature review, module 6)</i>                                                                 | In case of positive surgical margins, there is a strong recommendation in favour of adjuvant radiotherapy, arising from the assumption that the benefits outweigh the disadvantages. The phrase "appears to be effective" is used, but the guideline does not state the absolute survival gain and does not address side effects, short term or long term. Furthermore, we do not know if patients differ in how they weigh these considerations.                                                                                                                                                                                                     | 1 strong                               |

11  
12  
13  
14

As described under 3.1, the interviewees sometimes explained discrepancies between the strength of recommendation and the extracted information by the CPG panel's valuation of the outcomes. Explanations for the panel members' preferences beyond the evidence were: compliance with daily practice; the organisation of care; culture (a preference for radiotherapy seemed more culturally and historically determined than evidence-based); and concerns about keeping a good relationship between specialties when their treatments compete.

Some interviewees found that CPG panels' preferences underlying the weighing of benefits and harms should be made explicit. One interviewee stated that having an external party critically reviewing the CPGs before publication would foster this. The panel members often expressed their own preference for active treatment versus refraining from (further) treatment or active surveillance, even at the expense of over-treating a substantial part of the patient population.

**Panel member:** *That is watertight, radiotherapy does have an effect. Not for everyone, far from it, but for some. And we cannot sufficiently select for whom it does, so we say, give radiation to all.*

(Interview 4, about radiotherapy for DCIS patients)

Their motivation was mostly a strong belief in survival gain for a subgroup that cannot be identified as of yet. In these instances, panel preferences for active treatment had influenced the balancing of benefits and harms, such that a recommendation for active treatment would not be a weak one. This was argued e.g. for treatment aimed at reducing local recurrence rates without concomitant survival gain. Concerning this example, an interviewee argued in one instance that it was preferable simply to not include survival as an outcome, as no survival gain was possible given the already high survival (Interview 2, about radiotherapy for DCIS).

**Panel member:** *... but I find it a bit of a bromide to say that DCIS, or rather that radiotherapy for DCIS yields no survival benefit and therefore we shouldn't do it. Because one cannot improve upon 99 % survival benefit. The important thing is, in which sub-groups those recurrences occur that might not be such nice recurrences, that call for a lot more treatment and the like....*

(Interview 2, about radiotherapy for DCIS patients)

At the same time, others voiced opinions against over-treatment and pointed out that the paradigm in favour of over-treatment to avoid under-treatment is shifting, particularly in patients diagnosed by population screening (DCIS, T1 carcinoma in polyp).

### 3.5 Advice about patient involvement in decision-making

Five modules included in total 20 statements about the patient's role in decision-making (see Box 5). Relatively more statements (14) were seen for the weak than for the strong (6) recommendations. All statements recommended to include the patient's preferences in making the decision except for two, relating to weak recommendations, that recommended to inform the patient about the trade-off. One of the three CPGs included a separate chapter about decision-making, in which it was recommended to elicit the preferences of the patient in an SDM process.

Interviewees disagreed on the necessity of recommendations about patient involvement in decision-making. Several stressed that these statements were included only because the patient



1  
2  
3 1 representative asked for it. Others mentioned that the inclusion was based on the opinion of  
4 2 individual panel members.  
5  
6 3  
7

8 4 **Box 5: Examples of phrasings about the patient role**  
9  
10  
11  
12

13 **Statements that propose to inform the patient:**

- 14 1. *Additional surgical resection after endoscopic removal of a malignant polyp should always*  
15 *be a considered decision, given the relatively high 'number needed to treat', in which the*  
16 *patient must be fully informed about the possible oncological benefit on the one hand and*  
17 *the risk of complications on the other. (Section: Recommendations, module 3)*  
18  
19 2. *It appears worthwhile to inform patients with a high-risk stage II colorectal carcinoma*  
20 *about the possible advantages of adjuvant chemotherapy and the associated side-effects.*  
21 *(Section: Literature review, module 4)*  
22

23 **Statements that propose to include the patient's preferences in making the decision:**

- 24 1. *Side-effects and effectiveness of both endocrine therapy and radiotherapy should be*  
25 *weighed together with the patient. (Section: Recommendations, module 1)*  
26  
27 2. *For high-risk malignant colon polyps, the oncological benefit of additional colon resection*  
28 *should always be weighed against the risk of morbidity and even mortality. Age, tumour*  
29 *location, comorbidity, and the patient's preference should be included in this trade-off.*  
30 *(Section: Considerations, module 3)*  
31  
32

33 5

34 6

35 7

36  
37  
38 8 **4. DISCUSSION**

39 9 Healthcare is increasingly guideline-driven, which promotes quality of care and reduces unwarranted  
40 10 practice variation. But guidelines may be a barrier to SDM if they do not acknowledge the  
41 11 preference-sensitive nature of many treatment decisions.(1, 30) The aim of this study was to explore  
42 12 to what extent CPGs acknowledge preference-sensitive decisions in their recommendations. Our  
43 13 analysis showed that the guidelines involved incomplete and unclear presentation of benefits,  
44 14 harms, and the probabilities thereof. This makes it difficult for the users to judge the  
45 15 appropriateness of the strength of the recommendation. Further, it may hinder patient engagement  
46 16 in decision-making, which requires that patients are fully informed about the trade-offs. Moreover,  
47 17 patients may be directly accessing the guidelines, and inclusion of this information makes guidelines  
48 18 also more useful to them. Whether or not clinicians have complete knowledge about all benefits  
49 19 and harms and their probabilities is questionable, and from an earlier study we know that at least  
50 20 many clinicians do not share this information with their patients during the decision making  
51 21 process.(14, 15) Complete and clear presentation in CPGs of the benefits and harms help to fill  
52 22 knowledge gaps in CPG users, and acknowledge the importance of the information for the trade-offs  
53 23 to be made with the individual patient in preference-sensitive decisions.  
54  
55  
56  
57  
58  
59  
60

1  
2  
3 1 Furthermore, information on patient preferences or the variation therein, was not included in any  
4 2 of the six modules analysed. If GRADE were to be followed, this lack of evidence on patient  
5 3 preferences should have led to more weak recommendations than seen. Additionally, we found  
6 4 indications that panel members' assumptions about patient preferences as well as their own  
7 5 preferences, determined the recommendations. This corroborates findings of De Kort et al. (21) on  
8 6 the role of value judgements in guideline formulation in palliative oncology. They found that  
9 7 preferences, such as those for intervening and prolonging life, were not mentioned in the guidelines  
10 8 but had played an important role in determining final recommendations. In line with a study by  
11 9 Alexander et al. (37), it appeared that panel members find it difficult to refrain from providing a clear  
12 10 recommendation in a case of limited or conflicting evidence. CPG panel preferences for active  
13 11 treatment had influenced the way the panel had balanced benefits and harms, such that a  
14 12 recommendation for active treatment would be strong and overtreatment likely. The strong belief in  
15 13 survival gain for a subgroup that cannot be identified as of yet fosters the so-called therapeutic  
16 14 illusion, in which both physicians and patients overestimate the benefits of treatment, since patients  
17 15 are seemingly cured by treatment while they might have had the same outcome without  
18 16 treatment.(38) Rather than routinely resort to active treatment in these instances, the discussion  
19 17 should be opened on how to deal with such uncertainties. Little research is available yet on how best  
20 18 to communicate uncertainty,(39) but this does not relieve us from the obligation to discuss matters  
21 19 honestly with patients. Such openness would contribute to reducing unnecessary treatment,  
22 20 addressing unacceptable variation, and delivering more appropriate, personalised care.(40)  
23 21 Guidelines can facilitate this discussion by acknowledging preference-sensitive decisions, and  
24 22 encouraging users to become more aware of choice and presenting multiple options to patients.  
25 23

24 24 A limitation of the format of GRADE, is that it asks for a dichotomous categorization (weak vs.  
25 25 strong) and a recommendation either *for* or *against*. This categorization makes it difficult to  
26 26 explicitly state that multiple options are medically reasonable. Furthermore, information on patient  
27 27 preferences should be more often sought in guideline development. Oncologist experts are invited  
28 28 in guideline panels because of their content expertise, but this involves a risk when more evidence is  
29 29 available for benefits than for harms, and when there is no evidence on patient preferences. Then  
30 30 chances increase that that panel members resort to their own preferences, often favouring active  
31 31 treatment and neglecting harms.(41) The guideline development process, while aiming at achieving  
32 32 EBM, may threaten it by its reliance on expert judgment at the expense of involving patient  
33 33 preferences. GRADE publications accede that panels' judgements of patient preferences often rely  
34 34 on their interactions with patients, but how well such judgements correspond to typical values and  
35 35 preferences is uncertain.  
36 36

37 37 We do not know to what extent our analysis will hold for CPGs from other countries than the  
38 38 Netherlands. Dutch healthcare is likely less paternalistic than that in many other countries, and the  
39 39 Netherlands are leading in the implementation of SDM(42). We therefore expect more discrepancies  
40 40 between evidence and recommendations to arise elsewhere. De Kort et al.,(21) analysed a sample of  
41 41 evidence-based oncology guidelines from other countries, and found that recommendations were  
42 42 rarely explained and value judgements were not made explicit either. Further, we do not know if,  
43 43 but have no reason to expect that our findings will be different for other specialties. We urge  
44 44 researchers in other countries and other fields to evaluate their guidelines with preference-  
45 45 sensitivity in mind as well.

1  
2  
3 1  
4 2 An analysis like the one performed runs the risk of subjectivity, as the data extraction and coding  
5 3 requires interpretation. We therefore checked our results with the developers of the guidelines we  
6 4 studied. This provided a validation of our analysis. The aim of this endeavour was to highlight an  
7 5 issue that is a major barrier to patient-centred care and SDM in particular.(43) With the strong  
8 6 current call for patient involvement, worldwide, it is important to establish to what extent guidelines  
9 7 potentially hinder such involvement, and our study may be seen as a first step in that direction.  
10 8

11 9 In sum, our analysis points to a lack of transparency in the CPG development process about benefits  
12 10 and harms and their probabilities, the preferences of the guideline panel members, and their  
13 11 assumptions about patient preferences. Awareness needs to be created among CPG-developers that  
14 12 their judgments of the balance of benefits and harms are value-laden, and that variation exists in  
15 13 these judgments, among both clinicians and patients. Clear instructions and training to enhance  
16 14 knowledge and implementation of GRADE might improve the acknowledgement of preference-  
17 15 sensitive decisions in guidelines and support shared decision making. This will help avoid what  
18 16 McCartney feared in his 2016 Analysis in the BMJ: “there is the danger of guideline  
19 17 recommendations being applied to people who do not place the same values on those  
20 18 recommendations as their clinician (...)”.(23)  
21 19

## 22 ACKNOWLEDGEMENTS

23 We thank all interviewees for their participation in this study.  
24

## 25 AUTHORS CONTRIBUTION

26 FG, AHP, JP, and AMS designed the study. FG, DH, BG, GJL and AMS were involved in acquisition of  
27 the data, FG and AMS conducted the data extraction. FG, ML, DH, TA, GJL, AHP, and AMS were  
28 involved in interpreting the results.

29 FG and AMS wrote the first drafts and final version of the manuscript. JP, ML, DH, TA, BG, GJL, and  
30 AHP have read the manuscript critically, made improvements to the content and wording of the  
31 work.

32 FG, JP, ML, DH, TA, BG, GJL, AHP, and AMS all agreed to the final version.

33 The corresponding author attests that all listed authors meet authorship criteria and that no others  
34 meeting the criteria have been omitted.  
35

## 37 EXCLUSIVE LICENCE STATEMENT

38 The Corresponding Author has the right to grant on behalf of all authors and does grant on behalf of  
39 all authors, a worldwide licence to the Publishers and its licensees in perpetuity, in all forms, formats  
40 and media (whether known now or created in the future), to i) publish, reproduce, distribute, display  
41 and store the Contribution, ii) translate the Contribution into other languages, create adaptations,  
42 reprints, include within collections and create summaries, extracts and/or, abstracts of the  
43 Contribution and convert or allow conversion into any format including without limitation audio, iii)  
44 create any other derivative work(s) based in whole or part on the on the Contribution, iv) to exploit  
45 all subsidiary rights to exploit all subsidiary rights that currently exist or as may exist in the future in  
60

1 the Contribution, v) the inclusion of electronic links from the Contribution to third party material  
2 where-ever it may be located; and, vi) licence any third party to do any or all of the above.  
3

For peer review only

CONFIDENTIAL

1  
2  
3  
4  
5  
6  
7  
8  
9  
10  
11  
12  
13  
14  
15  
16  
17  
18  
19  
20  
21  
22  
23  
24  
25  
26  
27  
28  
29  
30  
31  
32  
33  
34  
35  
36  
37  
38  
39  
40  
41  
42  
43  
44  
45  
46

**Table 1:** Overview of CPGs and modules analysed, number of interviews, and role and speciality of interviewees.

| Localisation                                 | Module                      | Publication date                                           | Approach                                         | Number of options discussed in recommendations | Strength of recommendations |      |         |         |        | Role and speciality of interviewees <sup>§</sup>                            |
|----------------------------------------------|-----------------------------|------------------------------------------------------------|--------------------------------------------------|------------------------------------------------|-----------------------------|------|---------|---------|--------|-----------------------------------------------------------------------------|
|                                              |                             |                                                            |                                                  |                                                | In favour                   |      | Neutral | Against |        |                                                                             |
|                                              |                             |                                                            |                                                  |                                                | Strong                      | Weak |         | Weak    | strong |                                                                             |
| <b>Breast cancer</b>                         | DCIS                        | IKNL, unpublished concept (27 <sup>th</sup> February 2017) | GRADE                                            | 5                                              | 1                           | 0    | 3       | 0       | 1      | Surgeon (N=2)<br>Radiotherapist (N=2)                                       |
|                                              | Endocrine therapy           | IKNL, unpublished concept (27 <sup>th</sup> March 2017)    | GRADE                                            | 11                                             | 4                           | 7    | 0       | 0       | 0      | None<br><br>IKNL Supervisor (N=1)* Patient representative (N=1)             |
| <b>Colorectal cancer</b>                     | T1 carcinoma in polyp       | 16 <sup>th</sup> April 2014 (version 3)                    | Evidence-based                                   | 3                                              | 1                           | 2    | 0       | 0       | 0      | Surgeon (N=1)<br>Gastroenterologist (N=1)                                   |
|                                              | Adjuvant chemotherapy       | 16 <sup>th</sup> April 2014 (version 3)                    | Evidence-based                                   | 6                                              | 4                           | 2    | 0       | 0       | 0      | Oncologist (N=1)<br><br>IKNL Supervisor (N=1)* Patient representative (N=1) |
| <b>Resectable non-small cell lung cancer</b> | Stereotactic radiotherapy   | 16 <sup>th</sup> April 2014 (version 3)                    | Evidence-based (2011) and Consensus-based (2013) | 3                                              | 1                           | 1    | 0       | 1       | 0      | Radiotherapist (N=3)**                                                      |
|                                              | (Neo) adjuvant radiotherapy | 16 <sup>th</sup> April 2014 (version 3)                    | Evidence-based (2011) and Consensus-based (2013) | 4                                              | 1                           | 2    | 0       | 0       | 1      | Radiotherapist (N=1)**<br><br>IKNL Supervisor (N=1)                         |

---

|            |            |             |             |             |            |            |            |                                                                                                                                           |
|------------|------------|-------------|-------------|-------------|------------|------------|------------|-------------------------------------------------------------------------------------------------------------------------------------------|
| <b>N=3</b> | <b>N=6</b> | <b>N=32</b> | <b>N=12</b> | <b>N=14</b> | <b>N=3</b> | <b>N=1</b> | <b>N=2</b> | IKNL Supervisors N=2; Patient<br>representatives N=2;<br>Radiotherapists N=5; Surgeons<br>N=3; Oncologists N=1;<br>Gastroenterologist N=1 |
|------------|------------|-------------|-------------|-------------|------------|------------|------------|-------------------------------------------------------------------------------------------------------------------------------------------|

---

IKNL, Netherlands Comprehensive Cancer Organisation

\*interviewed once, both about the breast cancer and the colorectal carcinoma guidelines

\*\* one radiotherapist was interviewed once about two modules of the NSCLC CPG.

For peer review only

Table 2. Quantitative overview of the results of the CPG analysis

|                                                      |                                             | Strength of recommendation |                 |           |
|------------------------------------------------------|---------------------------------------------|----------------------------|-----------------|-----------|
|                                                      |                                             | Strong                     | Weak or neutral | Total     |
|                                                      |                                             | N (%)                      | N (%)           | N (%)     |
|                                                      |                                             | <b>14 (44)</b>             | <b>18 (56)</b>  | <b>32</b> |
| <b>Trade-offs mentioned</b>                          | <b>Yes</b>                                  | 7 (50)                     | 11 (61)         | 18 (56)   |
|                                                      | <b>No</b>                                   | 7 (50)                     | 7 (39)          | 14 (44)   |
| <b>Patient preferences assessed</b>                  | <b>Yes</b>                                  | 0                          | 0               | 0         |
| <b>CPG panel's preferences mentioned</b>             | <b>Yes, explicitly</b>                      | 0                          | 0               | 0         |
|                                                      | <b>Yes, implicitly</b>                      | 10 (71)                    | 7 (39)          | 17 (53)   |
|                                                      | <b>No</b>                                   | 4 (29)                     | 11 (61)         | 15 (47)   |
| <b>Statements about patient involvement included</b> | <b>Yes, to actively involve the patient</b> | 6 (43)                     | 12 (67)         | 18 (56)   |
|                                                      | <b>Yes, to inform the patient</b>           | 0                          | 2 (11)          | 2 (6)     |
|                                                      | <b>No</b>                                   | 8 (57)                     | 4 (22)          | 12 (38)   |

**REFERENCES**

1. O'Connor AM, Legare F, Stacey D. Risk communication in practice: the contribution of decision aids. *BMJ*. 2003;327(7417):736-40.
2. Burstein HJ, Lacchetti C, Griggs JJ. Adjuvant Endocrine Therapy for Women With Hormone Receptor-Positive Breast Cancer: American Society of Clinical Oncology Clinical Practice Guideline Update on Ovarian Suppression Summary. *Journal of Oncology Practice*. 2016;12(4):390-3.
3. Early Breast Cancer Trialists' Collaborative G, Peto R, Davies C, Godwin J, Gray R, Pan HC, et al. Comparisons between different polychemotherapy regimens for early breast cancer: meta-analyses of long-term outcome among 100,000 women in 123 randomised trials. *Lancet*. 2012;379(9814):432-44.
4. Whelan T, Sawka C, Levine M, Gafni A, Reyno L, Willan A, et al. Helping patients make informed choices: a randomized trial of a decision aid for adjuvant chemotherapy in lymph node-negative breast cancer. *J Natl Cancer Inst*. 2003;95(8):581-7.
5. Shue J, Karia RJ, Cardone D, Samuels J, Shah M, Slover JD. A Randomized Controlled Trial of Two Distinct Shared Decision-Making Aids for Hip and Knee Osteoarthritis in an Ethnically Diverse Patient Population. *Value Health*. 2016;19(4):487-93.
6. Stacey D, Hawker G, Dervin G, Tugwell P, Boland L, Pomey M-P, et al. Decision aid for patients considering total knee arthroplasty with preference report for surgeons: a pilot randomized controlled trial. *BMC Musculoskeletal Disorders*. 2014;15(1):54.
7. Stacey D, Taljaard M, Dervin G, Tugwell P, O'Connor AM, Pomey MP, et al. Impact of patient decision aids on appropriate and timely access to hip or knee arthroplasty for osteoarthritis: a randomized controlled trial. *Osteoarthritis Cartilage*. 2016;24(1):99-107.
8. Hamelinck VC, Bastiaannet E, Pieterse AH, Jannink I, van de Velde CJ, Liefers GJ, et al. Patients' preferences for surgical and adjuvant systemic treatment in early breast cancer: a systematic review. *Cancer Treat Rev*. 2014;40(8):1005-18.
9. Pieterse AH, Stiggelbout AM, Baas-Thijssen MC, van de Velde CJ, Marijnen CA. Benefit from preoperative radiotherapy in rectal cancer treatment: disease-free patients' and oncologists' preferences. *Br J Cancer*. 2007;97(6):717-24.
10. Couet N, Desroches S, Robitaille H, Vaillancourt H, Leblanc A, Turcotte S, et al. Assessments of the extent to which health-care providers involve patients in decision making: a systematic review of studies using the OPTION instrument. *Health Expect*. 2015;18(4):542-61.
11. Snijders HS, Kunneman M, Bonsing BA, de Vries AC, Tollenaar RA, Pieterse AH, et al. Preoperative risk information and patient involvement in surgical treatment for rectal and sigmoid cancer. *Colorectal Dis*. 2014;16(2):O43-9.
12. Kunneman M, Branda ME, Hargraves I, Pieterse AH, Montori VM. Fostering Choice Awareness for Shared Decision Making: A Secondary Analysis of Video-Recorded Clinical Encounters. *Mayo Clin Proc Innov Qual Outcomes*. 2018;2(1):60-8.
13. Kunneman M, Engelhardt EG, Ten Hove FL, Marijnen CA, Portielje JE, Smets EM, et al. Deciding about (neo-)adjuvant rectal and breast cancer treatment: Missed opportunities for shared decision making. *Acta Oncol*. 2016;55(2):134-9.
14. Kunneman M, Marijnen CA, Rozema T, Ceha HM, Grootenboers DA, Neelis KJ, et al. Decision consultations on preoperative radiotherapy for rectal cancer: large variation in benefits and harms that are addressed. *Br J Cancer*. 2015;112(1):39-43.
15. Engelhardt EG, Pieterse AH, van der Hout A, de Haes HJ, Kroep JR, Quarles van Ufford-Mannesse P, et al. Use of implicit persuasion in decision making about adjuvant cancer treatment: A potential barrier to shared decision making. *Eur J Cancer*. 2016;66:55-66.
16. Kunneman M, Stiggelbout AM, Marijnen CA, Pieterse AH. Probabilities of benefit and harms of preoperative radiotherapy for rectal cancer: What do radiation oncologists tell and what do patients understand? *Patient Educ Couns*. 2015;98(9):1092-8.



17. Kunneman M, Marijnen CA, Baas-Thijssen MC, van der Linden YM, Rozema T, Muller K, et al. Considering patient values and treatment preferences enhances patient involvement in rectal cancer treatment decision making. *Radiother Oncol.* 2015;117(2):338-42.
18. Pieterse AH, Kunneman M, Engelhardt EG, Brouwer NJ, Kroep JR, Marijnen CAM, et al. Oncologist, patient, and companion questions during pretreatment consultations about adjuvant cancer treatment: a shared decision-making perspective. *Psychooncology.* 2017;26(7):943-50.
19. Chong CA, Chen IJ, Naglie G, Krahn MD. How well do guidelines incorporate evidence on patient preferences? *J Gen Intern Med.* 2009;24(8):977-82.
20. McCormack JP, Loewen P. Adding "value" to clinical practice guidelines. *Can Fam Physician.* 2007;53(8):1326-7.
21. de Kort SJ, Burgers JS, Willems DL. Value judgements that matter to patients remain implicit in oncology guidelines: an observational study. *Neth J Med.* 2009;67(2):62-8.
22. Krahn M, Naglie G. The next step in guideline development: incorporating patient preferences. *JAMA.* 2008;300(4):436-8.
23. McCartney M, Treadwell J, Maskrey N, Lehman R. Making evidence based medicine work for individual patients. *BMJ.* 2016;353:i2452.
24. Montori VM, Brito JP, Murad MH. The optimal practice of evidence-based medicine: incorporating patient preferences in practice guidelines. *JAMA.* 2013;310(23):2503-4.
25. Shaneyfelt TM, Centor RM. Reassessment of clinical practice guidelines: go gently into that good night. *JAMA.* 2009;301(8):868-9.
26. Alonso-Coello P, Oxman AD, Moberg J, Brignardello-Petersen R, Akl EA, Davoli M, et al. GRADE Evidence to Decision (EtD) frameworks: a systematic and transparent approach to making well informed healthcare choices. 2: Clinical practice guidelines. *BMJ.* 2016;353:i2089.
27. Alonso-Coello P, Schunemann HJ, Moberg J, Brignardello-Petersen R, Akl EA, Davoli M, et al. GRADE Evidence to Decision (EtD) frameworks: a systematic and transparent approach to making well informed healthcare choices. 1: Introduction. *BMJ.* 2016;353:i2016.
28. Andrews J, Guyatt G, Oxman AD, Alderson P, Dahm P, Falck-Ytter Y, et al. GRADE guidelines: 14. Going from evidence to recommendations: the significance and presentation of recommendations. *J Clin Epidemiol.* 2013;66(7):719-25.
29. Andrews JC, Schunemann HJ, Oxman AD, Pottie K, Meerpohl JJ, Coello PA, et al. GRADE guidelines: 15. Going from evidence to recommendation-determinants of a recommendation's direction and strength. *J Clin Epidemiol.* 2013;66(7):726-35.
30. Stiggelbout AM, Van der Weijden T, De Wit MP, Frosch D, Legare F, Montori VM, et al. Shared decision making: really putting patients at the centre of healthcare. *BMJ.* 2012;344:e256.
31. Zhang Y, Coello PA, Brozek J, Wiercioch W, Etxeandia-Ikobaltzeta I, Akl EA, et al. Using patient values and preferences to inform the importance of health outcomes in practice guideline development following the GRADE approach. *Health Qual Life Outcomes.* 2017;15(1):52.
32. Alexander P.E. GMR, Li S.A., Bero L., Stoltzfus R.J., Neumann I., Brito J.P., Djulbegovic B., Montori V.M., Norris S.L., Schünemann H.J., Thabane L., Guyatt G.H. A number of factors explain why WHO guideline developers make strong recommendations inconsistent with GRADE guidance. *J Clin Epidemiol.* 2016;70:111-22.
33. Schunemann HJ, Wiercioch W, Brozek J, Etxeandia-Ikobaltzeta I, Mustafa RA, Manja V, et al. GRADE Evidence to Decision (EtD) frameworks for adoption, adaptation, and de novo development of trustworthy recommendations: GRADE-ADOLOPMENT. *J Clin Epidemiol.* 2017;81:101-10.
34. Gale NK, Heath G, Cameron E, Rashid S, Redwood S. Using the framework method for the analysis of qualitative data in multi-disciplinary health research. *BMC Med Res Methodol.* 2013;13:117.
35. Pope C, Ziebland S, Mays N. Qualitative research in health care. Analysing qualitative data. *BMJ.* 2000;320(7227):114-6.
36. Friese S. Atlas.ti 7 User manual. Berlin: Atlas.ti Scientific Software Development; 2012.

- 1  
2  
3 37. Alexander PE, Li SA, Gionfriddo MR, Stoltzfus RJ, Neumann I, Brito JP, et al. Senior GRADE  
4 methodologists encounter challenges as part of WHO guideline development panels: an inductive  
5 content analysis. *J Clin Epidemiol*. 2016;70:123-8.  
6  
7 38. Casarett D. The Science of Choosing Wisely--Overcoming the Therapeutic Illusion. *N Engl J*  
8 *Med*. 2016;374(13):1203-5.  
9 39. Engelhardt EG, Pieterse AH, Han PK, van Duijn-Bakker N, Cluitmans F, Maartense E, et al.  
10 Disclosing the Uncertainty Associated with Prognostic Estimates in Breast Cancer. *Med Decis*  
11 *Making*. 2017;37(3):179-92.  
12 40. Christie B. Catherine Calderwood: champion of "realistic medicine". *BMJ*. 2016;355:i5455.  
13 41. Ioannidis JPA. Hijacked evidence-based medicine: stay the course and throw the pirates  
14 overboard. *J Clin Epidemiol*. 2017;84:11-3.  
15 42. Coulter A. The global reach of shared decision making 2017 [Available from:  
16 [https://blogs.bmj.com/bmj/2017/07/13/angela-coulter-the-global-reach-of-shared-decision-](https://blogs.bmj.com/bmj/2017/07/13/angela-coulter-the-global-reach-of-shared-decision-making/)  
17 [making/](https://blogs.bmj.com/bmj/2017/07/13/angela-coulter-the-global-reach-of-shared-decision-making/).  
18  
19 43. van der Weijden T, Pieterse AH, Koelewijn-van Loon MS, Knaapen L, Legare F, Boivin A, et al.  
20 How can clinical practice guidelines be adapted to facilitate shared decision making? A qualitative  
21 key-informant study. *BMJ Qual Saf*. 2013;22(10):855-63.  
22  
23  
24  
25  
26  
27  
28  
29  
30  
31  
32  
33  
34  
35  
36  
37  
38  
39  
40  
41  
42  
43  
44  
45  
46  
47  
48  
49  
50  
51  
52  
53  
54  
55  
56  
57  
58  
59  
60

## Standards for Reporting Qualitative Research (SRQR)\*

<http://www.equator-network.org/reporting-guidelines/srqr/>

Page/line no(s).

### Title and abstract

|                                                                                                                                                                                                                                                              |        |
|--------------------------------------------------------------------------------------------------------------------------------------------------------------------------------------------------------------------------------------------------------------|--------|
| <p><b>Title</b> - Concise description of the nature and topic of the study Identifying the study as qualitative or indicating the approach (e.g., ethnography, grounded theory) or data collection methods (e.g., interview, focus group) is recommended</p> | Page 1 |
| <p><b>Abstract</b> - Summary of key elements of the study using the abstract format of the intended publication; typically includes background, purpose, methods, results, and conclusions</p>                                                               | Page 2 |

### Introduction

|                                                                                                                                                                     |                     |
|---------------------------------------------------------------------------------------------------------------------------------------------------------------------|---------------------|
| <p><b>Problem formulation</b> - Description and significance of the problem/phenomenon studied; review of relevant theory and empirical work; problem statement</p> | Page 4              |
| <p><b>Purpose or research question</b> - Purpose of the study and specific objectives or questions</p>                                                              | Page 4, lines 39-43 |

### Methods

|                                                                                                                                                                                                                                                                                                                                                                                                             |                                                              |
|-------------------------------------------------------------------------------------------------------------------------------------------------------------------------------------------------------------------------------------------------------------------------------------------------------------------------------------------------------------------------------------------------------------|--------------------------------------------------------------|
| <p><b>Qualitative approach and research paradigm</b> - Qualitative approach (e.g., ethnography, grounded theory, case study, phenomenology, narrative research) and guiding theory if appropriate; identifying the research paradigm (e.g., postpositivist, constructivist/ interpretivist) is also recommended; rationale**</p>                                                                            | Page 4, lines 26-37<br>Page 5, lines 4-14<br>Page 7, line 27 |
| <p><b>Researcher characteristics and reflexivity</b> - Researchers' characteristics that may influence the research, including personal attributes, qualifications/experience, relationship with participants, assumptions, and/or presuppositions; potential or actual interaction between researchers' characteristics and the research questions, approach, methods, results, and/or transferability</p> | Page 6, lines 35-37                                          |
| <p><b>Context</b> - Setting/site and salient contextual factors; rationale**</p>                                                                                                                                                                                                                                                                                                                            | Page 5, lines 16-20                                          |
| <p><b>Sampling strategy</b> - How and why research participants, documents, or events were selected; criteria for deciding when no further sampling was necessary (e.g., sampling saturation); rationale**</p>                                                                                                                                                                                              | Page 5, lines 24-34<br>Page 7, lines 5-7                     |
| <p><b>Ethical issues pertaining to human subjects</b> - Documentation of approval by an appropriate ethics review board and participant consent, or explanation for lack thereof; other confidentiality and data security issues</p>                                                                                                                                                                        | Page 7, lines 8-10                                           |
| <p><b>Data collection methods</b> - Types of data collected; details of data collection procedures including (as appropriate) start and stop dates of data collection and analysis, iterative process, triangulation of sources/methods, and modification of procedures in response to evolving study findings; rationale**</p>                                                                             | Page 5, line 39 -<br>page 6, line 31<br>Page 7, lines 13-24  |

|                                                                                                                         |                                                                                                                                                                                                                                                       |                                                                 |
|-------------------------------------------------------------------------------------------------------------------------|-------------------------------------------------------------------------------------------------------------------------------------------------------------------------------------------------------------------------------------------------------|-----------------------------------------------------------------|
| 1<br>2<br>3<br>4<br>5<br>6<br>7<br>8<br>9<br>10<br>11<br>12<br>13<br>14<br>15<br>16<br>17<br>18<br>19<br>20<br>21<br>22 | <b>Data collection instruments and technologies</b> - Description of instruments (e.g., interview guides, questionnaires) and devices (e.g., audio recorders) used for data collection; if/how the instrument(s) changed over the course of the study | Page 5, lines 37;<br>Page 6. Lines 33-41<br>Page 7, lines 22-24 |
|                                                                                                                         | <b>Units of study</b> - Number and relevant characteristics of participants, documents, or events included in the study; level of participation (could be reported in results)                                                                        | Page 5, lines 24-25<br>Page 7, line 45-<br>page 8, line 4       |
|                                                                                                                         | <b>Data processing</b> - Methods for processing data prior to and during analysis, including transcription, data entry, data management and security, verification of data integrity, data coding, and anonymization/de-identification of excerpts    | Page 7, line 27-36                                              |
|                                                                                                                         | <b>Data analysis</b> - Process by which inferences, themes, etc., were identified and developed, including the researchers involved in data analysis; usually references a specific paradigm or approach; rationale**                                 | Page 6, line 41<br>Page 7, line 33-44                           |
|                                                                                                                         | <b>Techniques to enhance trustworthiness</b> - Techniques to enhance trustworthiness and credibility of data analysis (e.g., member checking, audit trail, triangulation); rationale**                                                                | Page 7, lines 13-17                                             |

### Results/findings

|                                                          |                                                                                                                                                                                                   |                                         |
|----------------------------------------------------------|---------------------------------------------------------------------------------------------------------------------------------------------------------------------------------------------------|-----------------------------------------|
| 23<br>24<br>25<br>26<br>27<br>28<br>29<br>30<br>31<br>32 | <b>Synthesis and interpretation</b> - Main findings (e.g., interpretations, inferences, and themes); might include development of a theory or model, or integration with prior research or theory | Pages 7, line 44-<br>page 11, line 18   |
|                                                          | <b>Links to empirical data</b> - Evidence (e.g., quotes, field notes, text excerpts, photographs) to substantiate analytic findings                                                               | Idem (including<br>Boxes and<br>Tables) |

### Discussion

|                                                                |                                                                                                                                                                                                                                                                                                                                                                                                             |                                       |
|----------------------------------------------------------------|-------------------------------------------------------------------------------------------------------------------------------------------------------------------------------------------------------------------------------------------------------------------------------------------------------------------------------------------------------------------------------------------------------------|---------------------------------------|
| 33<br>34<br>35<br>36<br>37<br>38<br>39<br>40<br>41<br>42<br>43 | <b>Integration with prior work, implications, transferability, and contribution(s) to the field</b> - Short summary of main findings; explanation of how findings and conclusions connect to, support, elaborate on, or challenge conclusions of earlier scholarship; discussion of scope of application/generalizability; identification of unique contribution(s) to scholarship in a discipline or field | Page 11, line 22<br>– page 13, line 6 |
|                                                                | <b>Limitations</b> - Trustworthiness and limitations of findings                                                                                                                                                                                                                                                                                                                                            | Page 12, lines<br>29-44               |

### Other

|                                        |                                                                                                                                               |                     |
|----------------------------------------|-----------------------------------------------------------------------------------------------------------------------------------------------|---------------------|
| 44<br>45<br>46<br>47<br>48<br>49<br>50 | <b>Conflicts of interest</b> - Potential sources of influence or perceived influence on study conduct and conclusions; how these were managed | Page 3, lines 12-14 |
|                                        | <b>Funding</b> - Sources of funding and other support; role of funders in data collection, interpretation, and reporting                      | Page 3, lines 8-11  |

\*The authors created the SRQR by searching the literature to identify guidelines, reporting standards, and critical appraisal criteria for qualitative research; reviewing the reference lists of retrieved sources; and contacting experts to gain feedback. The SRQR aims to improve the transparency of all aspects of qualitative research by providing clear standards for reporting qualitative research.

1  
2  
3 \*\*The rationale should briefly discuss the justification for choosing that theory, approach,  
4 method, or technique rather than other options available, the assumptions and limitations  
5 implicit in those choices, and how those choices influence study conclusions and  
6 transferability. As appropriate, the rationale for several items might be discussed together.  
7

8 **Reference:**

9 [O'Brien BC, Harris IB, Beckman TJ, Reed DA, Cook DA. Standards for reporting qualitative  
10 research: a synthesis of recommendations. \*Academic Medicine\*, Vol. 89, No. 9 / Sept 2014  
11 DOI: 10.1097/ACM.0000000000000388](#)  
12  
13  
14  
15  
16  
17  
18  
19  
20  
21  
22  
23  
24  
25  
26  
27  
28  
29  
30  
31  
32  
33  
34  
35  
36  
37  
38  
39  
40  
41  
42  
43  
44  
45  
46  
47  
48  
49  
50  
51  
52  
53  
54  
55  
56  
57  
58  
59  
60

For peer review only
